# Supplementary material for: TPDYs: strained macrocyclic diynes for bioconjugation processes
Source: Royal Society of Chemistry journal article supplement (doi:10.1039/d4cc05367b), 2024-12-04
Supplement: d4cc05367b1.pdf [file d4cc05367b1.pdf]

## SUPPORTING INFORMATION

# TPDYs: Strained Macrocyclic Diynes for Bioconjugation Processes

Bernard D'Onofrio,<sup>1†</sup> Corentin Cruché,<sup>1†</sup> Kirsten N. Hurdal,<sup>2</sup> Adem Hadjabdelhafid-Parisien,<sup>1</sup> Joelle N. Pelletier,<sup>1\*</sup> Radu Iftimie,<sup>1\*</sup> Rebecca L. Davis,<sup>2\*</sup> and Shawn K. Collins<sup>1\*</sup>

1. Département de Chimie, Centre for Green Chemistry and Catalysis, Université de Montréal, 1375 Avenue Thérèse-Lavoie-Roux, Montréal, QC CANADA H2V 0B3 *Correspondance* : shawn.collins@umontreal.ca

2. Department of Chemistry, University of Manitoba, 144 Dysart Rd., Winnipeg, MB, CANADA R3T

‡ These authors contributed equally to this manuscript.

## Table of Contents

|                                       |    |
|---------------------------------------|----|
| <b>GENERAL</b>                        | 3  |
| <b>SYNTHESIS OF TPDYS AND ADDUCTS</b> | 4  |
| <b>NMR SPECTRA</b>                    | 26 |
| <b>COMPUTATIONAL STRUCTURES</b>       | 39 |
| <b>X-RAY CRYSTALLOGRAPHY</b>          | 89 |

## GENERAL

All reactions that were carried out under anhydrous conditions were performed under an inert argon or nitrogen atmosphere in glassware that had previously been dried overnight at 120 °C or had been flame dried and cooled under a stream of argon or nitrogen. All chemical products were obtained from Sigma-Aldrich Chemical Company, Oakwood Chemical or Alfa Aesar and were reagent quality. Technical solvents were obtained from VWR International Co. Anhydrous solvents (CH<sub>2</sub>Cl<sub>2</sub>, Et<sub>2</sub>O, THF, DMF, toluene, and n-hexane) were dried and deoxygenated using a GlassContour system (Irvine, CA). Isolated yields reflect the mass obtained following flash column silica gel chromatography. Organic compounds were purified using silica gel obtained from Silicycle Chemical division (40-63 nm; 230-240 mesh). Analytical thin-layer chromatography (TLC) was performed on glass-backed silica gel 60 coated with a fluorescence indicator (Silicycle Chemical division, 0.25 mm, F254.). Visualization of TLC plate was performed by UV (254 nm), KMnO<sub>4</sub> or p-anisaldehyde stains. All mixed solvent eluents are reported as v/v solutions. Concentration refers to removal of volatiles at low pressure on a rotary evaporator. All reported compounds were homogeneous by thin layer chromatography (TLC) and by <sup>1</sup>H NMR. NMR spectra were taken in deuterated CDCl<sub>3</sub> using Bruker AV-400 and AV-500 instruments unless otherwise noted. Signals due to the solvent served as the internal standard (CHCl<sub>3</sub>: δ 7.27 for <sup>1</sup>H, δ 77.0 for <sup>13</sup>C). The acquisition parameters are shown on all spectra. The <sup>1</sup>H NMR chemical shifts and coupling constants were determined assuming first-order behavior. Multiplicity is indicated by one or more of the following: s (singlet), d (doublet), t (triplet), q (quartet), m (multiplet), br (broad); the list of couplings constants (J) corresponds to the order of the multiplicity assignment. High resolution mass spectroscopy (HRMS) was done by the Centre régional de spectrométrie de masse at the Département de Chimie, Université de Montréal from an Agilent LC-MSD TOF system using ESI mode of ionization unless otherwise noted. X-ray structures were obtained from a shock-cooled single crystal at 150 K on a Bruker Venture Metaljet k-geometry diffractometer with a Metal Jet using a Helios MX Mirror Optics as monochromator and a Bruker CMOS Photon III detector. The diffractometer was equipped with an Oxford Cryostream 700 low temperature device and used GaK<sub>α</sub> radiation (λ = 1.34139 Å). Computational studies were done with a commercial computer equipped with 24 processor and 32 GB of RAM.

## SYNTHESIS OF TPDYS AND ADDUCTS

### Synthesis of 3,5-TPDY : Multi-Step Synthesis:

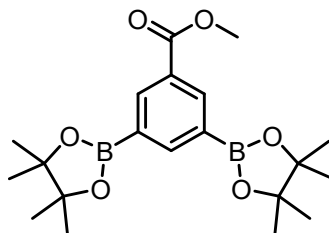

**Methyl 3,5-bis(4,4,5,5-tetramethyl-1,3,2-dioxaborolan-2-yl)benzoate (2):** In an open sealed tube was added methyl 3,5-dibromobenzoate (1.0 g, 3.4 mmol, 1 eq.), bis(pinacolato)diboron (1.99 g, 7.82 mmol, 2.3 eq.), and KOAc (2.0 g, 20.4 mmol, 6 eq.). Dry 1,4-dioxane (15 mL, [227 mM]) was added, and the mixture was purged with N<sub>2</sub> for 10 min. Under N<sub>2</sub> atmosphere, Pd(dppf)Cl<sub>2</sub> · CH<sub>2</sub>Cl<sub>2</sub> (124 mg, 0.170 mmol, 0.05 eq.) was added. The reaction vial was sealed with a Teflon cap and the mixture was then heated to 90 °C for 16 h. The reaction mixture was cooled to room temperature, filtered through a thin pad of Celite (eluting with 50 mL EtOAc), and concentrated. Purification by column chromatography (4 to 12% AcOEt in Hexanes) afforded the desired product as a white solid (1.21 g, 92%). <sup>1</sup>H NMR (500 MHz, CDCl<sub>3</sub>): δ 8.55 (d, *J* = 1.3 Hz, 2H), 8.45 – 8.41 (m, 1H), 3.91 (s, 3H), 1.35 (s, 24H); <sup>13</sup>C NMR (101 MHz, CDCl<sub>3</sub>): δ 167.3, 145.6, 138.7, 129.1, 84.2, 77.4, 52.1, 25.0; HRMS (ESI): *m/z* calculated for C<sub>20</sub>H<sub>30</sub>[<sup>11</sup>B]<sub>2</sub>O<sub>6</sub> [M+H]<sup>+</sup>, 389.2301; found: 389.2304.

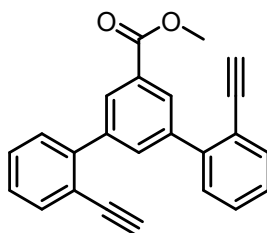

**Methyl 2,2''-diethynyl-[1,1':3',1''-terphenyl]-5'-carboxylate (4):** In a sealed tube vessel was added methyl 3,5-bis(4,4,5,5-tetramethyl-1,3,2-dioxaborolan-2-yl)benzoate (500 mg, 1.3 mmol, 1 eq.) and tripotassium phosphate (1.78 g, 7.7 mmol, 6 eq.). Toluene (26 mL [47 mM]) and H<sub>2</sub>O (2.6 mL [47 mM]) were added, and the mixture was purged with N<sub>2</sub> for 10 min. Under N<sub>2</sub> atmosphere was added (2-bromophenylethynyl)trimethylsilane (631 μL, 3.0 mmol, 2.3 eq.), followed by SPhos (69.3 mg, 0.17 mmol, 0.13 eq.) and palladium acetate (18.8 mg, 0.084 mmol, 0.065 eq.). The vessel was sealed with a Teflon cap and the reaction mixture was then heated to 90 °C for 5 h. The reaction mixture was cooled to room temperature, filtered through a thin pad of Celite (eluting with 50 mL EtOAc), and concentrated. The crude mixture was diluted in AcOEt, washed with 10 mL of a saturated solution of K<sub>2</sub>CO<sub>3</sub> and saturated brine, dried over Na<sub>2</sub>SO<sub>4</sub>, and concentrated *in vacuo*. The resulting solid was diluted in 5 mL of THF, and TBAF (6 mL, 1M in THF, 12 eq.) was added. The solution was stirred for 5 h. Then, 20 mL of water were added and the mixture was extracted with 3 x 10 mL of AcOEt. The combined organics were dried with MgSO<sub>4</sub> and then concentrated under reduced pressure. Purification by column chromatography (10% AcOEt in Hexanes) afforded the desired product as a brown solid (308 mg, 71 %). <sup>1</sup>H NMR (400 MHz, CDCl<sub>3</sub>): δ 8.31 (d, *J* = 1.8 Hz, 2H), 7.99 (dd, *J* = 1.8, 1.8 Hz, 1H), 7.68 – 7.61 (m, 2H), 7.50 – 7.40 (m, 4H), 7.40 – 7.30 (m, 2H), 3.95 (s, 3H), 3.09 (s, 2H); <sup>13</sup>C NMR (101 MHz, CDCl<sub>3</sub>): δ 167.1, 143.4, 140.4, 134.7, 134.1, 130.0, 129.7, 129.7, 129.3, 127.7, 120.7, 83.0, 80.9, 52.4; HRMS (ESI): *m/z* calculated for C<sub>24</sub>H<sub>16</sub>O<sub>2</sub> [M+H]<sup>+</sup>, 337.1223; found: 337.1210.

### Synthesis of 3,5-TPDY : One-Pot Synthesis:

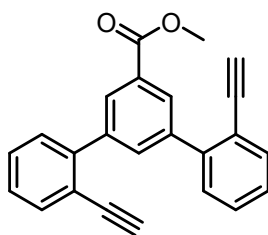

**Methyl 2,2''-diethynyl-[1,1':3',1''-terphenyl]-5'-carboxylate (4):** In a sealed tube vessel was added XPhos-Pd G3 (8.46 mg, 10  $\mu$ mol, 0.02 eq.), XPhos (9.53 mg, 20  $\mu$ mol, 0.04 eq.), tetrahydroxydiboron (269 mg, 3 mmol, 6 eq.), and KOAc (294 mg, 3 mmol, 6 eq.). The vessel was sealed and the atmosphere was flushed with N<sub>2</sub>. Degassed EtOH (5 mL, [0.1M]) was added via syringe followed by the addition of the dibromoarene (147mg, 0.5 mmol, 1 eq.). The reaction mixture was then heated to 80 °C for 1.5 h. Then a needle outlet attached to a manifold under argon was inserted into the septum and degassed aqueous K<sub>2</sub>CO<sub>3</sub> (6 eq., 1.8M, 1.67 mL, 3 mmol) and (2-bromophenylethynyl)trimethylsilane (257 mg, 1 mmol, 2 eq.) were added via syringe. The manifold needle was removed, and the reaction mixture was again heated to 80 °C for 15 h. The reaction mixture was cooled to room temperature, filtered through a thin pad of Celite (eluting with 50 mL EtOAc), and concentrated. The crude solid diluted with 20 mL of water, and the mixture was extracted with EtOAc (3  $\times$  10 mL), and the combined organics were dried with MgSO<sub>4</sub> and then concentrated under reduced pressure. The resulting solid was diluted in 5 mL of THF, and TBAF (6 mL, 1M in THF, 12 eq.) was added. The solution was stirred for 5 h. Then, 20 mL of water was added, and the mixture was extracted with 3  $\times$  10 mL of AcOEt. The combined organics were dried with MgSO<sub>4</sub> and then concentrated under reduced pressure. Purification by column chromatography (10% AcOEt in Hexanes) afforded the desired product as a brown solid (132 mg, 55%).

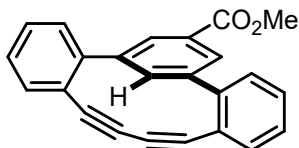

**3,5-TPDY (5):** To a solution of copper acetate (432 mg, 2.38 mmol, 4 eq.) in Et<sub>2</sub>O:Pyridine 1:1 [3 mM] was slowly added over a period of 3 h a solution of methyl 2,2''-diethynyl-[1,1':3',1''-terphenyl]-5'-carboxylate (200 mg, 0.60 mmol, 1 eq.) in 20 mL of Et<sub>2</sub>O:Pyridine 1:3. The solution was then stirred for an additional 2 h or until full consumption of the starting material observed by TLC. The solvent was removed, and the solution was diluted in CH<sub>2</sub>Cl<sub>2</sub>. The organic phase was then washed with 1M HCl twice, a saturated solution of NH<sub>4</sub>OH four times and saturated brine. The organic phase was then dried over Na<sub>2</sub>SO<sub>4</sub>, and concentrated *in vacuo*, to give the pure product as an off-white solid (190 mg, 96%). Alternatively, the product can be purified by flash column chromatography (0 $\rightarrow$ 1% AcOEt in Hexanes). <sup>1</sup>H NMR (400 MHz, CDCl<sub>3</sub>):  $\delta$  8.55 (dd,  $J$  = 1.8, 1.8 Hz, 1H), 8.02 (d,  $J$  = 1.8 Hz, 2H), 7.62 (dd,  $J$  = 7.8, 1.3 Hz, 2H), 7.51 – 7.43 (m, 2H), 7.40 – 7.31 (m, 2H), 7.31 – 7.26 (m, 2H), 3.94 (s, 3H); <sup>13</sup>C NMR (101 MHz, CDCl<sub>3</sub>):  $\delta$  166.9, 147.9, 142.1, 140.4, 131.5, 130.5, 130.1, 129.9, 128.1, 127.7, 121.9, 107.6, 87.0, 52.4; HRMS (ESI):  $m/z$  calculated for C<sub>24</sub>H<sub>14</sub>O<sub>2</sub> [M+H]<sup>+</sup>, 335.1067; found: 335.1069.

## Synthesis of 3,5-TPDY-PEG-NH<sub>3</sub>Cl

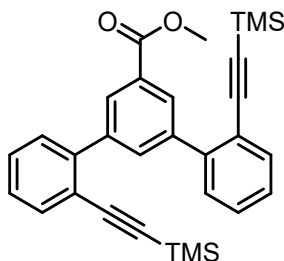

**Methyl 2,2''-bis((trimethylsilyl)ethynyl)-[1,1':3',1''-terphenyl]-5'-carboxylate (S1):** In a sealed tube was added methyl 3,5-bis(4,4,5,5-tetramethyl-1,3,2-dioxaborolan-2-yl)benzoate (500 mg, 1.3 mmol, 1 eq.) and tripotassium phosphate (1.78 g, 7.7 mmol, 6 eq.). Toluene (26 mL [47 mM]) and H<sub>2</sub>O (2.6 mL [47 mM]) were added, and the mixture was purged with N<sub>2</sub> for 10 min. Under N<sub>2</sub> atmosphere was added (2-bromophenylethynyl)trimethylsilane (631  $\mu$ L, 3.0 mmol, 2.3 eq.), followed by SPhos (69.3 mg, 0.17 mmol, 0.13 eq.) and palladium acetate (18.8 mg, 0.084 mmol, 0.065 eq.). The vessel was sealed with a Teflon cap and the reaction mixture was then heated to 90 °C for 5 h. The reaction mixture was cooled to room temperature, filtered through a thin pad of Celite (eluting with 50 mL EtOAc), and concentrated. The crude mixture was diluted in AcOEt, washed with 10 mL of a saturated solution of K<sub>2</sub>CO<sub>3</sub> and saturated brine, dried over Na<sub>2</sub>SO<sub>4</sub>, and concentrated *in vacuo*. Purification by flash column chromatography (0→2% AcOEt in Hexanes) afforded the pure product as a orange sticky solid (450 mg, 73 %). <sup>1</sup>H NMR (400 MHz, CDCl<sub>3</sub>):  $\delta$  8.35 (d, *J* = 1.8 Hz, 2H), 8.11 (dd, *J* = 1.8, 1.8 Hz, 1H), 7.60 (dd, *J* = 7.7, 1.4 Hz, 2H), 7.47 (dd, *J* = 7.8, 1.4 Hz, 2H), 7.40 (ddd, *J* = 7.6, 7.6, 1.4 Hz, 2H), 7.31 (ddd, *J* = 7.5, 7.6 1.4, Hz, 2H), 3.94 (s, 3H), 0.04 (s, 18H); <sup>13</sup>C NMR (101 MHz, CDCl<sub>3</sub>):  $\delta$  167.2, 143.0, 140.2, 135.0, 133.7, 129.7, 129.7, 129.5, 129.0, 127.5, 121.6, 104.4, 98.2, 52.2, -0.3; HRMS (ESI): *m/z* calculated for C<sub>30</sub>H<sub>32</sub>O<sub>2</sub>Si<sub>2</sub> [M+H]<sup>+</sup>, 481.2014; found: 481.2007.

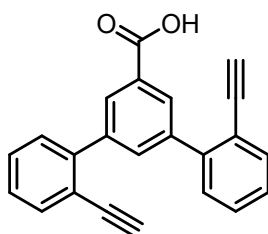

**2,2''-Diethynyl-[1,1':3',1''-terphenyl]-5'-carboxylic acid (6):** 2,2''-Diethynyl-[1,1':3',1''-terphenyl]-5'-carboxylate (140 mg, 0.42 mmol, 1 eq.) was dissolved in THF:H<sub>2</sub>O 12:1 (4.4 mL, [96 mM]). Sodium methoxide (25% wt in MeOH, 2 mL, 18 eq.) was slowly added and the mixture was stirred at room temperature overnight. The solution was quenched with 1M HCl, and extracted three times with CH<sub>2</sub>Cl<sub>2</sub>. The organic phases were combined, washed with saturated brine, dried over Na<sub>2</sub>SO<sub>4</sub>, and concentrated *in vacuo*. Purification by flash column chromatography (20→60% AcOEt in Hexanes) afforded the pure product as a orange powder (121 mg, 90%). NMR (400 MHz, CDCl<sub>3</sub>):  $\delta$  8.43 – 8.38 (m, 2H), 8.07 – 8.02 (m, 1H), 7.69 – 7.62 (m, 2H), 7.50 – 7.42 (m, 4H), 7.41 – 7.31 (m, 2H), 3.11 (s, 2H); <sup>13</sup>C NMR (101 MHz, CDCl<sub>3</sub>):  $\delta$  143.2, 140.5, 135.5, 134.1, 130.3, 129.7, 129.3, 127.7, 120.7, 82.9, 81.0; HRMS (ESI): *m/z* calculated for C<sub>23</sub>H<sub>14</sub>O<sub>2</sub> [M+H]<sup>+</sup>, 323.1067; found: 323.1061.

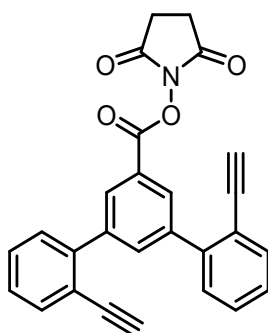

**2,5-Dioxopyrrolidin-1-yl 2,2''-diethynyl-[1,1':3',1''-terphenyl]-5'-carboxylate (S2c):** 2,2''-Diethynyl-[1,1':3',1''-terphenyl]-5'-carboxylic acid (150 mg, 0.47 mmol, 1 eq.) and N-hydroxysuccinimide (64 mg, 0.56 mmol, 1.2 eq.) were dissolved in dry  $\text{CH}_2\text{Cl}_2$  (7.5 mL, [62 mM]). N-(3-Dimethylaminopropyl)-N'-ethylcarbodiimide hydrochloride (107 mg, 0.56 mmol, 1.2 eq.) was added and the mixture was stirred at room temperature overnight. The mixture was then diluted with 30 mL of  $\text{CH}_2\text{Cl}_2$  and washed twice with 10 mL of water. The organic phase was dried over  $\text{MgSO}_4$  and concentrated *in vacuo*. Purification by flash column chromatography (20→40% AcOEt in Hexanes) afforded the pure product as a off-white powder (142 mg, 73 %).  **$^1\text{H}$  NMR (400 MHz,  $\text{CDCl}_3$ ):**  $\delta$  8.41 (d,  $J = 1.7$  Hz, 2H), 8.09 (dd,  $J = 1.7, 1.7$  Hz, 1H), 7.68 – 7.61 (m, 2H), 7.49 – 7.41 (m, 4H), 7.36 (ddd,  $J = 7.6, 5.2, 3.7$  Hz, 2H), 3.13 (s, 2H), 2.91 (br, 4H);  **$^{13}\text{C}$  NMR (101 MHz,  $\text{CDCl}_3$ ):**  $\delta$  169.3, 162.0, 142.7, 140.9, 136.7, 134.1, 130.5, 129.6, 129.4, 128.0, 125.0, 120.8, 82.7, 81.3, 25.8; **HRMS (ESI):**  $m/z$  calculated for  $\text{C}_{27}\text{H}_{17}\text{NO}_4$   $[\text{M}+\text{NH}_4]^+$ , 437.1496; found: 437.1507.

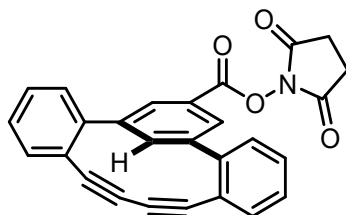

**3,5-TPDY-OSucc (7):** To a solution of copper acetate (482 mg, 2.65 mmol, 5.2 eq.) in  $\text{Et}_2\text{O}$ :Pyridine 1:1 [3 mM] was slowly added over a period of 3 h a solution of 2,5-dioxopyrrolidin-1-yl 2,2''-diethynyl-[1,1':3',1''-terphenyl]-5'-carboxylate (214 mg, 0.51 mmol, 1 eq.) in 20 mL of  $\text{Et}_2\text{O}$ :Pyridine 1:3. The solution was then stirred for an additional 2 h or until full consumption of the starting material observed by TLC. The solvent was removed, and the solution was diluted in  $\text{CH}_2\text{Cl}_2$ . The organic phase was then washed with 1M HCl twice and saturated brine. The organic phase was then dried over  $\text{Na}_2\text{SO}_4$  and concentrated *in vacuo*. Purification by flash column chromatography (20→60% AcOEt in Hexanes) afforded the pure product as an off-white powder (170 mg, 80 %).  **$^1\text{H}$  NMR (400 MHz,  $\text{CDCl}_3$ ):**  $\delta$  8.63 (dd,  $J = 1.7, 1.7$  Hz, 1H), 8.10 (d,  $J = 1.8$  Hz, 2H), 7.62 (dd,  $J = 7.4, 1.1$  Hz, 2H), 7.52 – 7.44 (m, 2H), 7.37 (dd,  $J = 7.6, 1.3$  Hz, 2H), 7.31 – 7.20 (m, 2H), 2.92 (s, 4H);  **$^{13}\text{C}$  NMR (101 MHz,  $\text{CDCl}_3$ ):**  $\delta$  169.3, 161.8, 147.2, 144.0, 141.0, 132.2, 130.4, 130.2, 128.4, 127.7, 124.9, 121.9, 107.2, 87.0, 25.8; **HRMS (ESI):**  $m/z$  calculated for  $\text{C}_{27}\text{H}_{15}\text{NO}_4$   $[\text{M}+\text{NH}_4]^+$ , 435.1339; found: 435.1334.

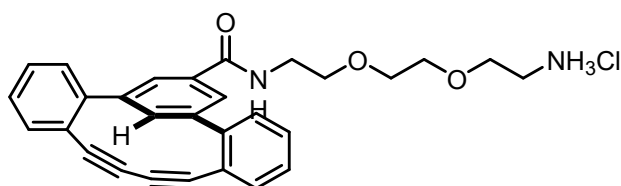

**3,5-TPDY-PEG-NH<sub>3</sub>Cl (8)**: 3,5-TPDY-OSucc (60 mg, 0.144 mmol, 1 eq.) and tert-butyl (2-(2-(2-aminoethoxy)ethoxy)ethyl)carbamate (65 mg, 0.262 mmol, 1.8 eq.) were dissolved in CH<sub>2</sub>Cl<sub>2</sub> (2 mL, [72 mM]) and the reaction was stirred at room temperature for 5 h. The solvent was then concentrated *in vacuo* and purification by flash column chromatography (50→100% AcOEt in Hexanes) afforded 3,5-TPDY-PEG-NHBoc. The product was then directly dissolved in 1 mL of HCl 4M in dioxane. The reaction was stirred until disappearance of the starting material and then 7 mL of hexanes were added. The precipitate was filtered and rinsed with hexanes, affording the desired product as an off-white solid (22 mg, 34 %) <sup>1</sup>H NMR (400 MHz, DMSO-d<sub>6</sub>): δ 8.82 (dd, *J* = 5.6, 5.6 Hz, 1H), 8.40 (dd, *J* = 1.7, 1.7 Hz, 1H), 7.97 (br, 3H), 7.84 (d, *J* = 1.8 Hz, 2H), 7.76 (dd, *J* = 7.8, 1.3 Hz, 2H), 7.66 – 7.58 (m, 2H), 7.47 (ddd, *J* = 7.6, 7.6, 1.3 Hz, 2H), 7.39 (dd, *J* = 7.7, 1.4 Hz, 2H), 3.65 – 3.52 (m, 9H), 3.50 – 3.40 (m, 2H), 2.99 – 2.87 (m, 2H); <sup>13</sup>C NMR (101 MHz, DMSO-d<sub>6</sub>): δ 165.8, 147.6, 139.5, 139.3, 134.1, 130.8, 130.6, 129.2, 128.4, 127.5, 120.4, 107.9, 86.2, 69.7, 69.5, 68.9, 66.6.

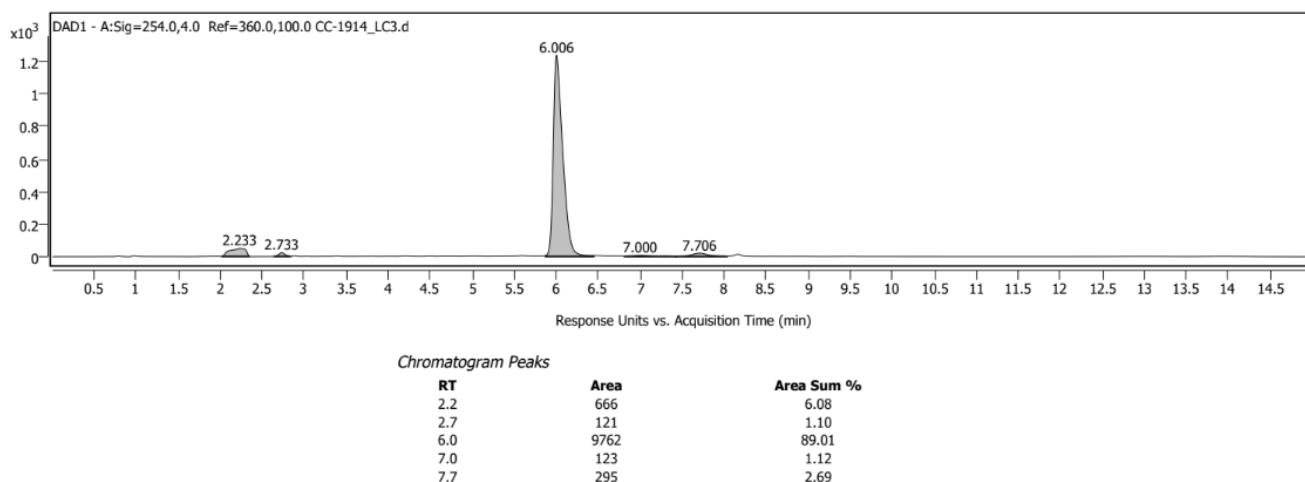

Figure S1 : HPLC chromatogram of **3,5-TPDY-PEG-NH<sub>3</sub>Cl**.

## Strain-Promoted Alkyne-Azide Cycloadditions

### General procedure

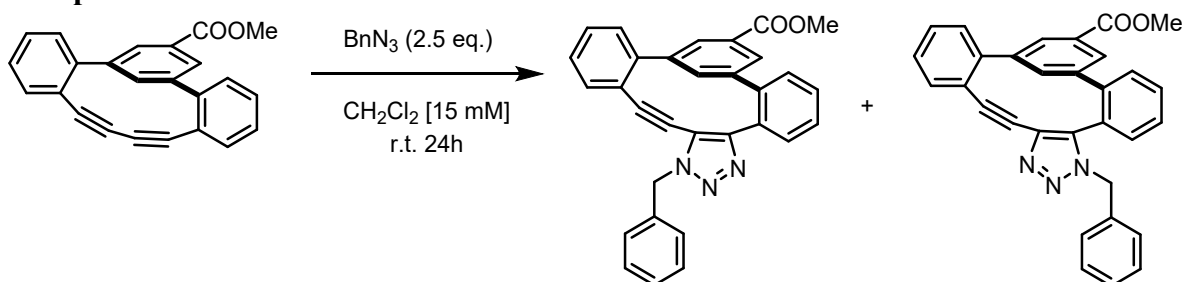

General Protocol: To a solution of 3,5-TPDY (50 mg, 0.15 mmol, 1 eq.) in CH<sub>2</sub>Cl<sub>2</sub> [15 mM] was added benzyl azide (50 mg, 0.37 mmol, 2.5 eq.) and the reaction was stirred at room temperature for 24 h. The solution was then concentrated *in vacuo*. Purification by flash column chromatography (1→2% AcOEt in Hexanes) afforded the desired regioisomers as off-white solids (66 mg, 94%, 7:3).

## Kinetic Measurements

The second order rate constants were measured using <sup>1</sup>H NMR spectroscopy in CDCl<sub>3</sub> at 25 °C using 1,3,5-trimethoxybenzene as an internal standard. A solution of the diyne [22 mM] and 1,3,5-

trimethoxybenzene [7mM] in 4 mL of  $\text{CDCl}_3$  was prepared. In an NMR tube was added 0.5 mL of the solution. The tube was used to calibrate the NMR instrument and as a  $t=0$  reference. Then, 0.25 mL (2.5 eq.) of a solution of benzylazide [110 mM] in  $\text{CDCl}_3$  was added and the NMR tube was vigorously shaken and put into an NMR spectrometer immediately. Measurements were taken at the specified interval until 50% conversion was achieved. The experiment was repeated three times. The rate constants were estimated using the equation:

$$k = \frac{1}{t(a-b)} \times \ln \frac{b(a-x)}{a(b-x)}$$

k is the rate constant in  $\text{M}^{-1} \times \text{s}^{-1}$

t is the reaction time in seconds

a is the initial concentration of benzyl azide in mol/L

b is the initial concentration of the alkyne in mol/L

x is the sum of the concentrations of the regioisomer in mol/L

k is the slope of the graphic plot of  $\frac{1}{(a-b)} \times \ln \frac{b(a-x)}{a(b-x)}$  versus the reaction time



### 3,5-TPDY

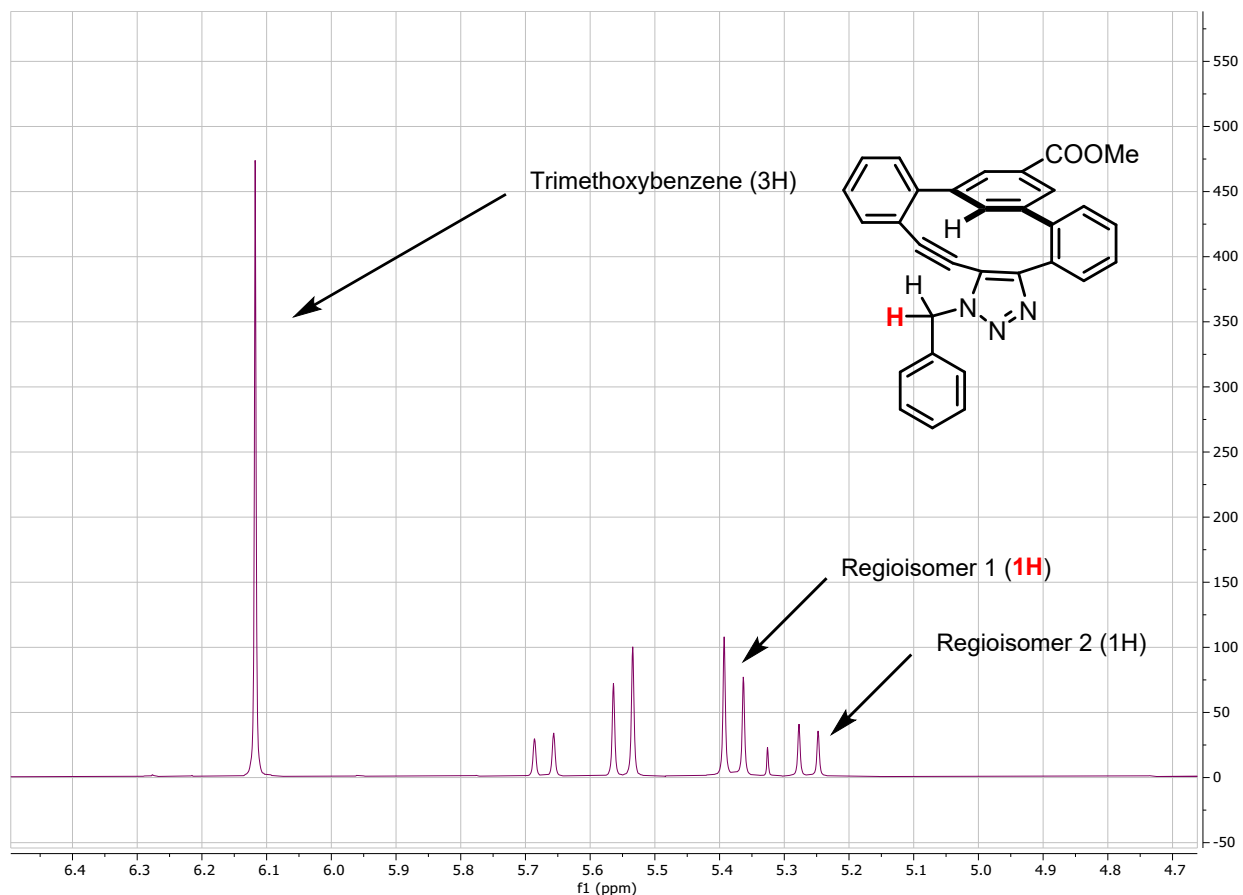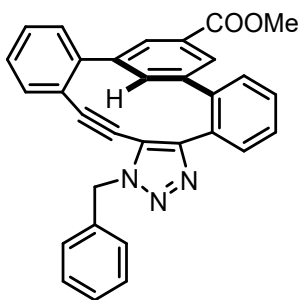

**Regioisomer 5c-triazole 1:** <sup>1</sup>H NMR (400 MHz, CDCl<sub>3</sub>): δ 8.35 (dd, *J* = 1.7, 1.7 Hz, 1H), 7.98 – 7.91 (m, 2H), 7.76 (dd, *J* = 7.8, 1.4 Hz, 1H), 7.71 (d, *J* = 7.6 Hz, 1H), 7.56 – 7.35 (m, 5H), 7.35 – 7.28 (m, 4H), 7.28 – 7.22 (m, 2H), 5.53 (d, *J* = 14.9 Hz, 1H), 5.36 (d, *J* = 14.8 Hz, 1H), 3.90 (s, 3H); <sup>13</sup>C NMR (176 MHz, CDCl<sub>3</sub>): δ 166.9, 149.4, 145.3, 141.9, 140.6, 140.0, 138.1, 134.7, 133.1, 131.4, 130.5, 129.9, 129.8, 129.7, 128.9, 128.8, 128.5, 128.5, 128.3, 128.2, 128.1, 128.1, 127.0, 122.3, 118.8, 103.3, 83.6, 53.1, 52.3; HRMS (ESI): *m/z* calculated for C<sub>31</sub>H<sub>21</sub>N<sub>3</sub>O<sub>2</sub> [M+H]<sup>+</sup>, 468.1707; found: 468.1708.

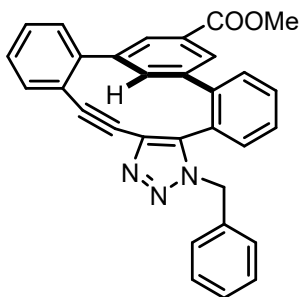

**Regioisomer 5c-triazole 2:**  $^1\text{H NMR}$  (400 MHz,  $\text{CDCl}_3$ ):  $\delta$  8.15 (dd,  $J = 1.8, 1.8$  Hz, 1H), 7.87 (dd,  $J = 1.7, 1.7$  Hz, 1H), 7.60 (dd,  $J = 7.7, 1.3$  Hz, 1H), 7.57 – 7.52 (m, 1H), 7.51 – 7.40 (m, 3H), 7.38 – 7.28 (m, 3H), 7.25 – 7.20 (m, 3H), 6.96 (dd,  $J = 1.7, 1.7$  Hz, 1H), 6.68 – 6.63 (m, 2H), 5.64 (d,  $J = 14.8$  Hz, 1H), 5.23 (d,  $J = 14.8$  Hz, 1H), 3.91 (s, 3H);  $^{13}\text{C NMR}$  (101 MHz,  $\text{CDCl}_3$ ):  $\delta$  166.7, 145.0, 142.9, 141.5, 138.4, 138.3, 138.0, 134.2, 131.5, 130.3, 130.3, 129.9, 129.8, 129.6, 128.9, 128.5, 128.4, 128.1, 127.6, 126.9, 123.0, 96.4, 88.2, 53.5, 52.2; **HRMS (ESI):**  $m/z$  calculated for  $\text{C}_{31}\text{H}_{21}\text{N}_3\text{O}_2$   $[\text{M}+\text{H}]^+$ , 468.1707; found: 468.1708.

*Note:* Regioisomers configurations were confirmed by X-ray crystallography of the regioisomer **5c-triazole 1**.

Kinetics measurements were taken every 5 min for 40 minutes

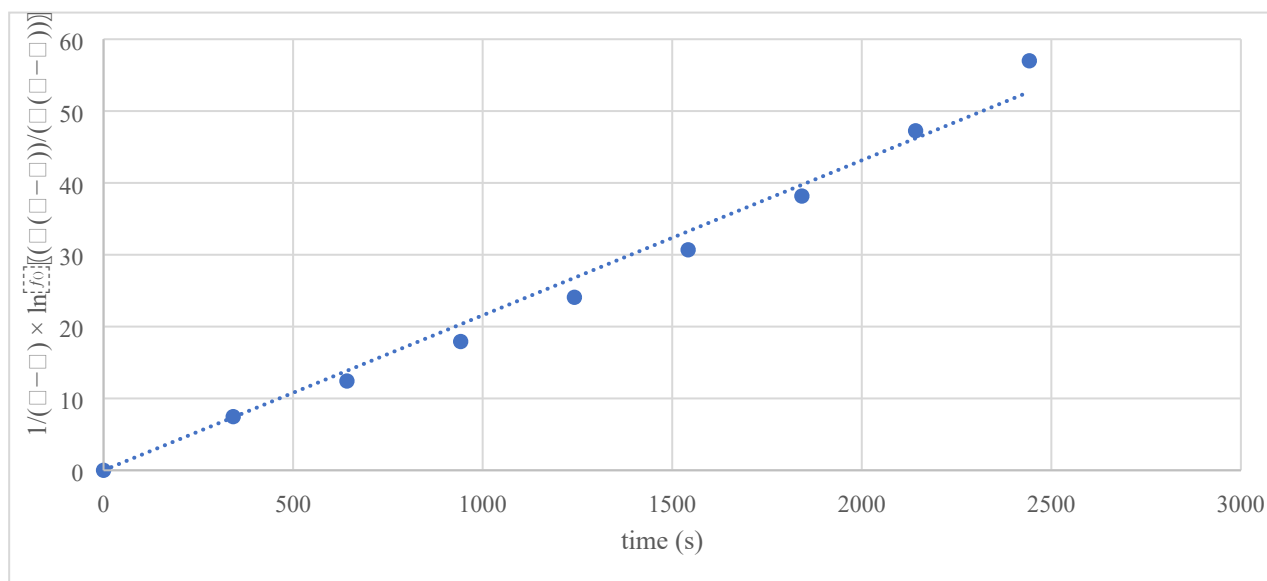

Figure S2: Plot of  $\frac{1}{(a-b)} \times \ln \frac{b(a-x)}{a(b-x)}$  versus the reaction time for 3,5-TPDY Run 1

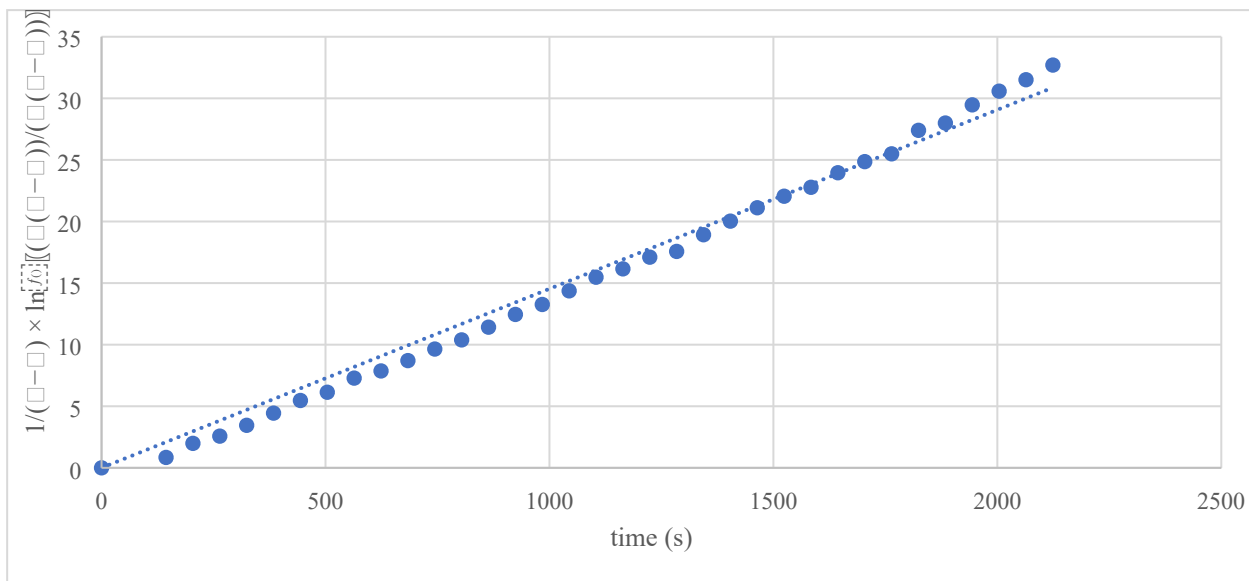

Figure S3: Plot of  $\frac{1}{(a-b)} \times \ln \frac{b(a-x)}{a(b-x)}$  versus the reaction time for 3,5-TPDY Run 2

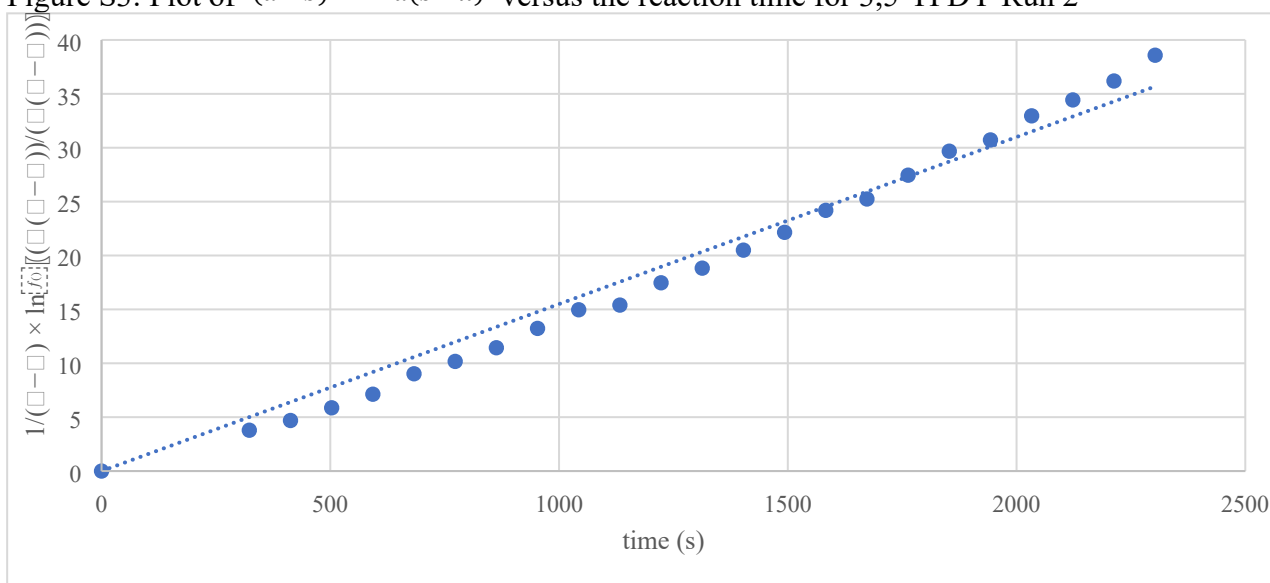

Figure S4: Plot of  $\frac{1}{(a-b)} \times \ln \frac{b(a-x)}{a(b-x)}$  versus the reaction time for 3,5-TPDY Run 3  
 Average rate constant:  $k = 1.7 \pm 1 \cdot 10^{-2} \text{ M}^{-1}\cdot\text{s}^{-1}$

### 3,5-TPDY PEG

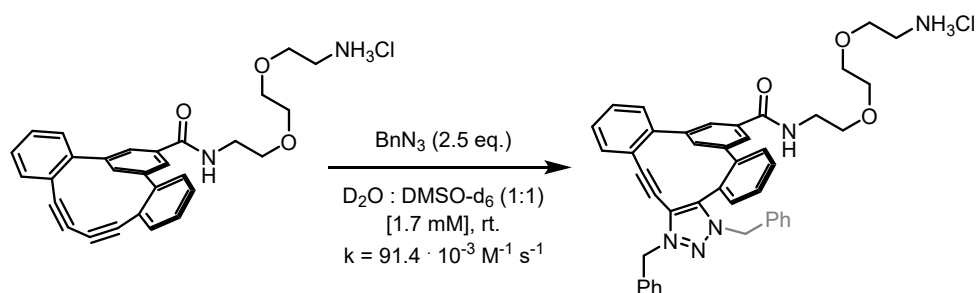

*Note: exo and endo isomers not determined due to complex spectra.*

Kinetics measurements were taken every 60 sec for 12 minutes

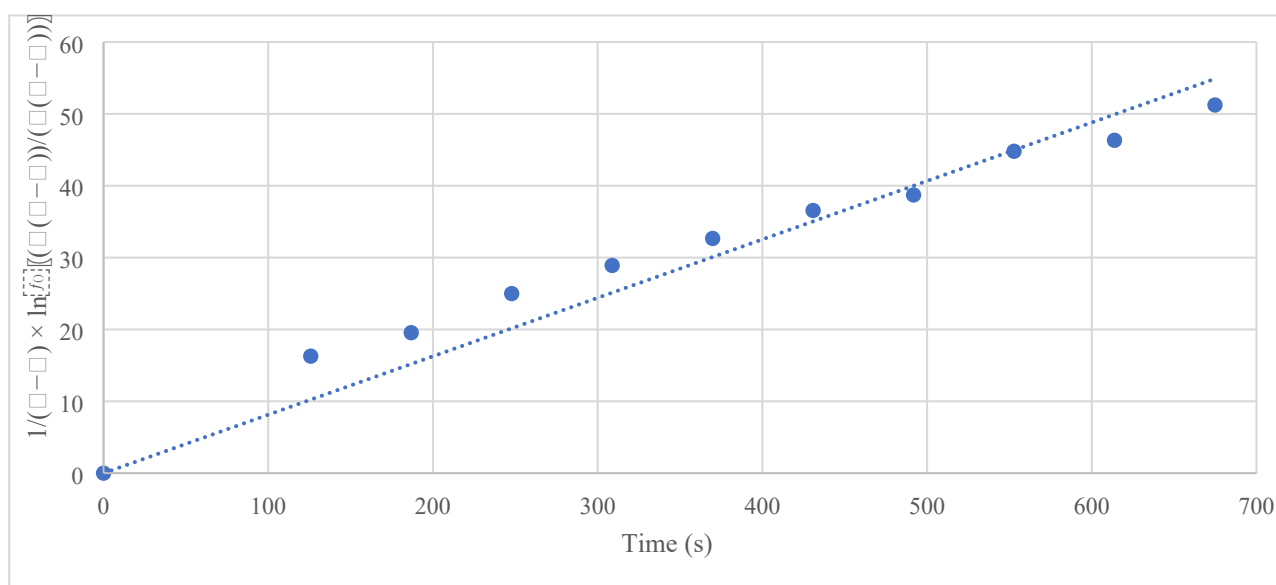

Figure S7: Plot of  $\frac{1}{(a-b)} \times \ln \frac{b(a-x)}{a(b-x)}$  versus the reaction time for 3,5-TPDY PEG Run 1

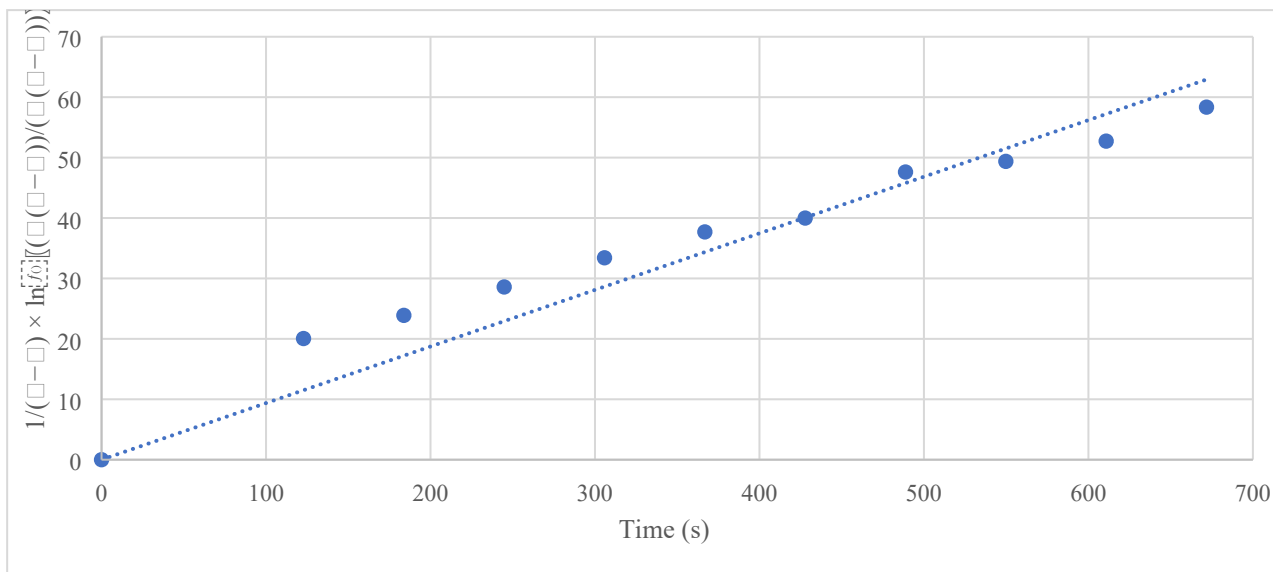

Figure S8: Plot of  $\frac{1}{(a-b)} \times \ln \frac{b(a-x)}{a(b-x)}$  versus the reaction time for 3,5-TPDY PEG Run 2

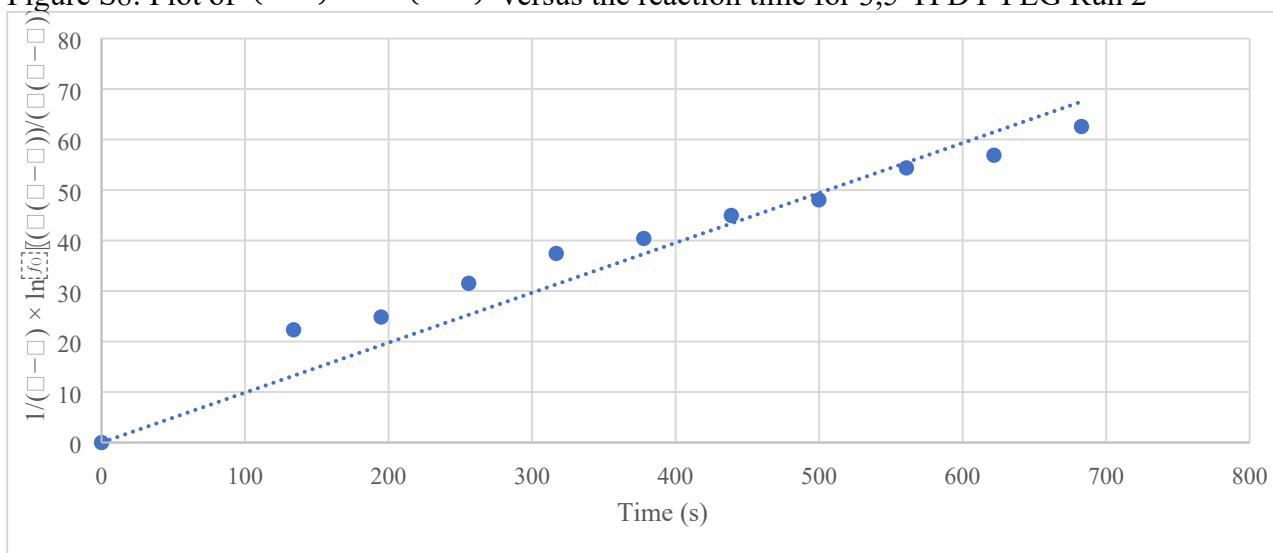

Figure S9: Plot of  $\frac{1}{(a-b)} \times \ln \frac{b(a-x)}{a(b-x)}$  versus the reaction time for 3,5-TPDY PEG Run 3  
Average :  $k = 91.4 \times 10^{-3} \text{ M}^{-1} \text{ s}^{-1}$

### 3,5-TPDY Cycloaddition with EDA

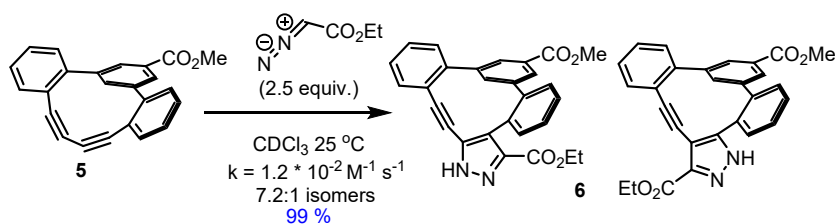

To a solution of 3,5-TPDY (30 mg, 0.0897 mmol, 1 eq.) in  $\text{CH}_2\text{Cl}_2$  [15 mM] was added ethyl diazoacetate solution 13 % in  $\text{CH}_2\text{Cl}_2$  (180  $\mu\text{L}$ , 0.224 mmol, 2.5 eq.) and the reaction was stirred at room temperature for 3 h. The solution was then concentrated *in vacuo*. Purification by flash column chromatography (5 : 20 : 75  $\rightarrow$  20 : 20 : 60 (AcOEt :  $\text{CH}_2\text{Cl}_2$  : Hexanes)) afforded the desired regioisomers as a pale yellow solid (40 mg, 99%, 7.2:1). *Note: exo and endo isomers were separated and NMR spectra shown below.*

**$^1\text{H}$  NMR (400 MHz, Chloroform-*d*):**  $\delta$  8.20 (dd,  $J = 1.7$  Hz, 1H), 7.96 – 7.91 (m, 2H), 7.68 (dd,  $J = 7.7, 1.2$  Hz, 1H), 7.52 – 7.41 (m, 2H), 7.41 – 7.30 (m, 4H), 7.26 – 7.22 (m, 1H), 4.31 – 4.11 (m, 2H), 3.89 (s, 3H), 1.17 (t,  $J = 7.1$  Hz, 3H);  **$^{13}\text{C}$  NMR (101 MHz,  $\text{CDCl}_3$ ):** 167.1, 160.3, 145.8, 142.2, 141.3, 140.1, 138.1, 134.3, 130.6, 130.0, 129.8, 129.7, 129.1, 128.1, 128.0, 127.8, 127.6, 127.1, 126.9, 122.9, 96.9, 87.6, 77.5, 77.2, 76.8, 61.4, 52.3, 14.0; **HRMS (ESI):**  $m/z$  calculated for  $\text{C}_{28}\text{H}_{20}\text{N}_2\text{O}_4$  [M+H] $^+$ , 449.1515; found: 449.1496

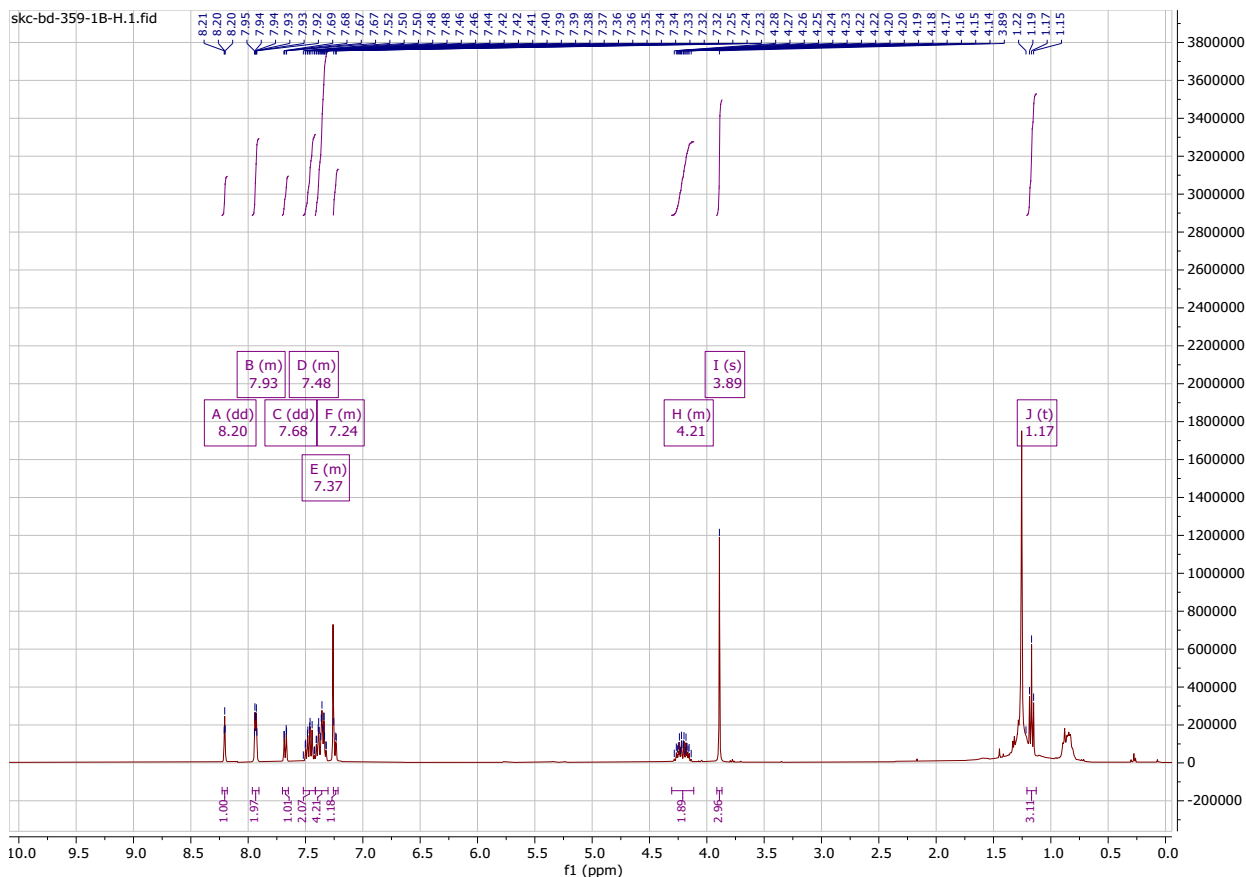

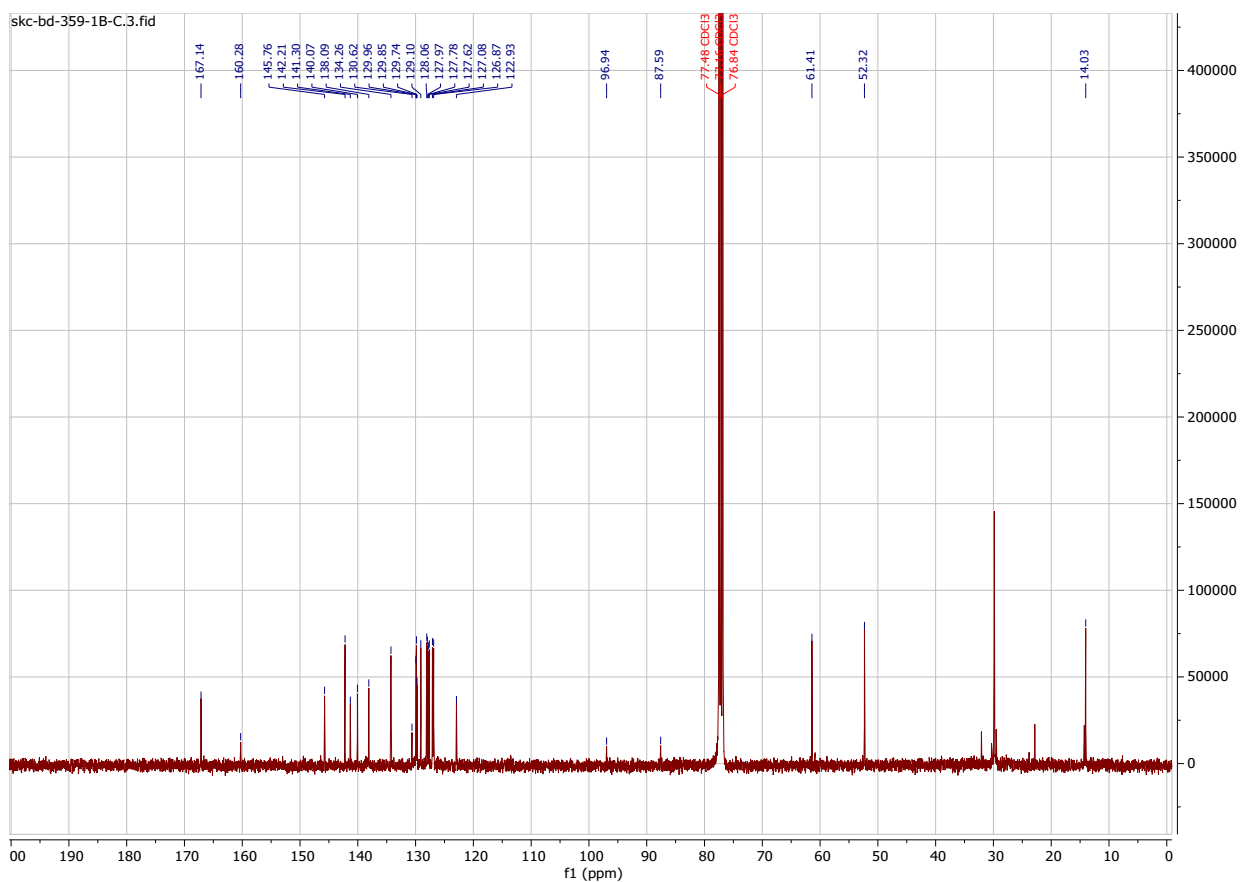

**<sup>1</sup>H NMR (400 MHz, Chloroform-*d*):**  $\delta$  8.44 (dd,  $J = 1.7$  Hz, 1H), 7.94 (dd,  $J = 1.6$  Hz, 1H), 7.86 (dd,  $J = 1.6$  Hz, 1H), 7.65 (dd,  $J = 7.6, 1.3$  Hz, 1H), 7.50 – 7.39 (m, 5H), 7.36 – 7.30 (m, 2H), 4.38 – 4.22 (m, 2H), 3.87 (s, 3H), 1.32 (t,  $J = 7.1$  Hz, 3H); **<sup>13</sup>C NMR (101 MHz, CDCl<sub>3</sub>):**  $\delta$  167.1, 160.7, 144.6, 142.3, 141.5, 138.9, 138.7, 132.1, 131.2, 130.7, 130.3, 129.7, 129.5, 129.2, 129.2, 128.3, 128.2, 128.1, 127.8, 126.6, 124.3, 104.4, 96.7, 88.8, 61.4, 52.3, 14.2. **HRMS (ESI):**  $m/z$  calculated for C<sub>28</sub>H<sub>20</sub>N<sub>2</sub>O<sub>4</sub> [M+H]<sup>+</sup>, 449.14958; found: 449.14931

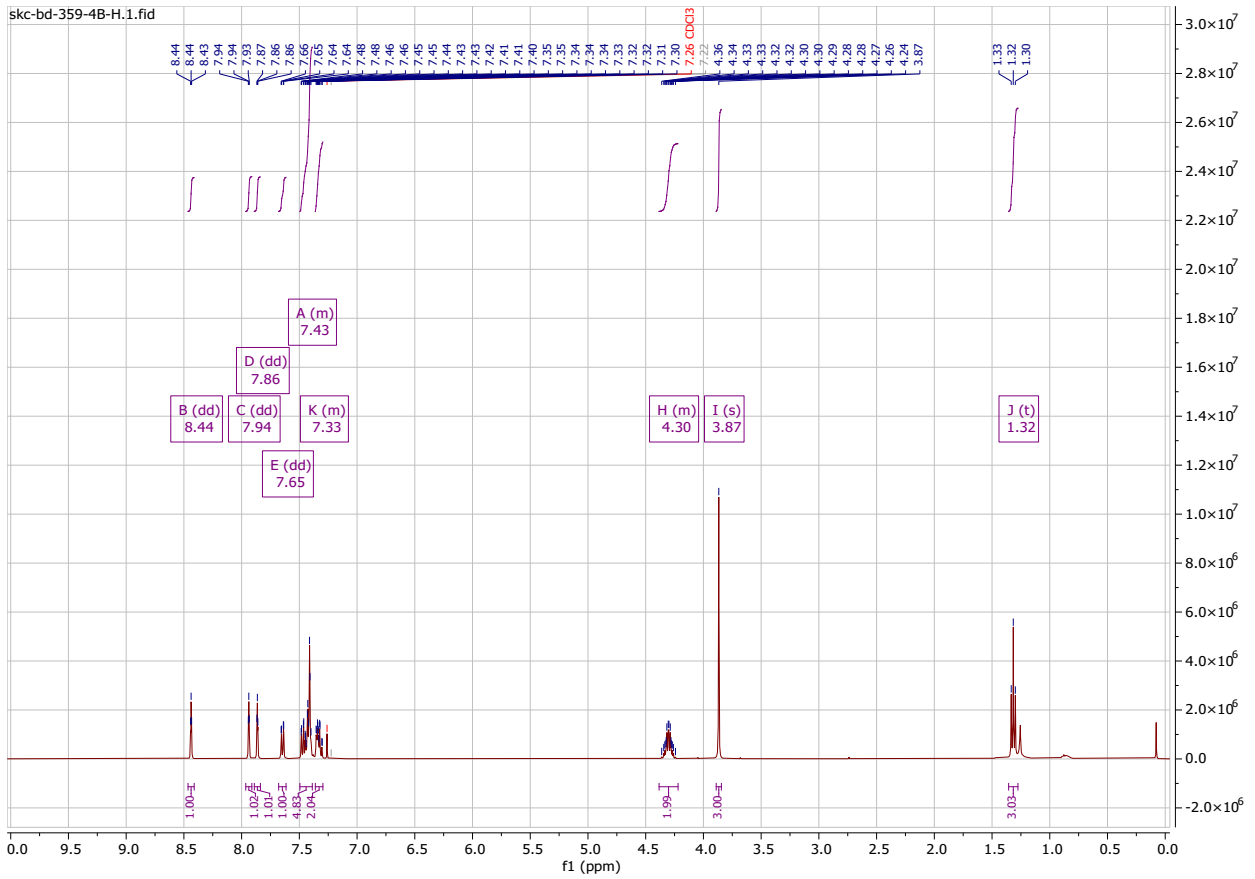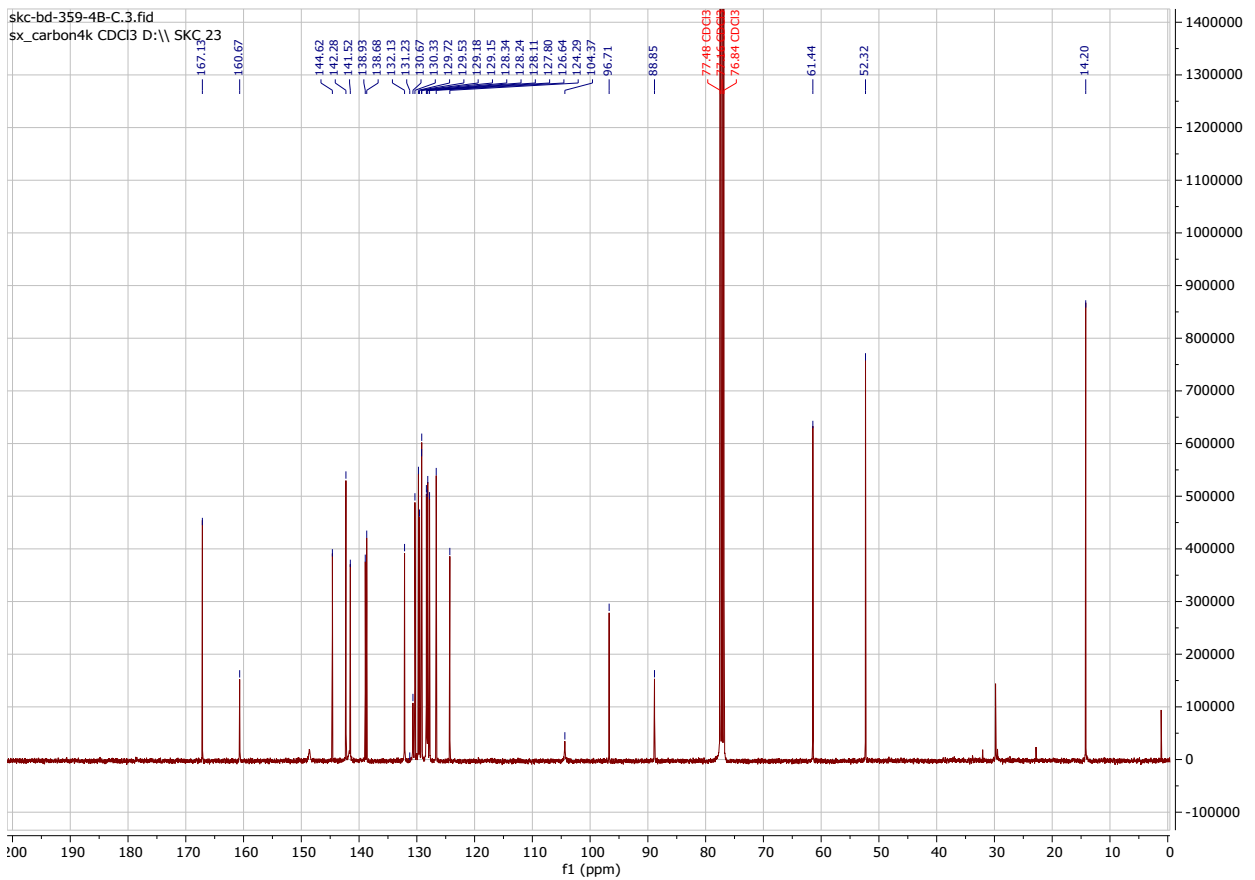

Kinetics measurements were taken every 90 sec for 45 minutes



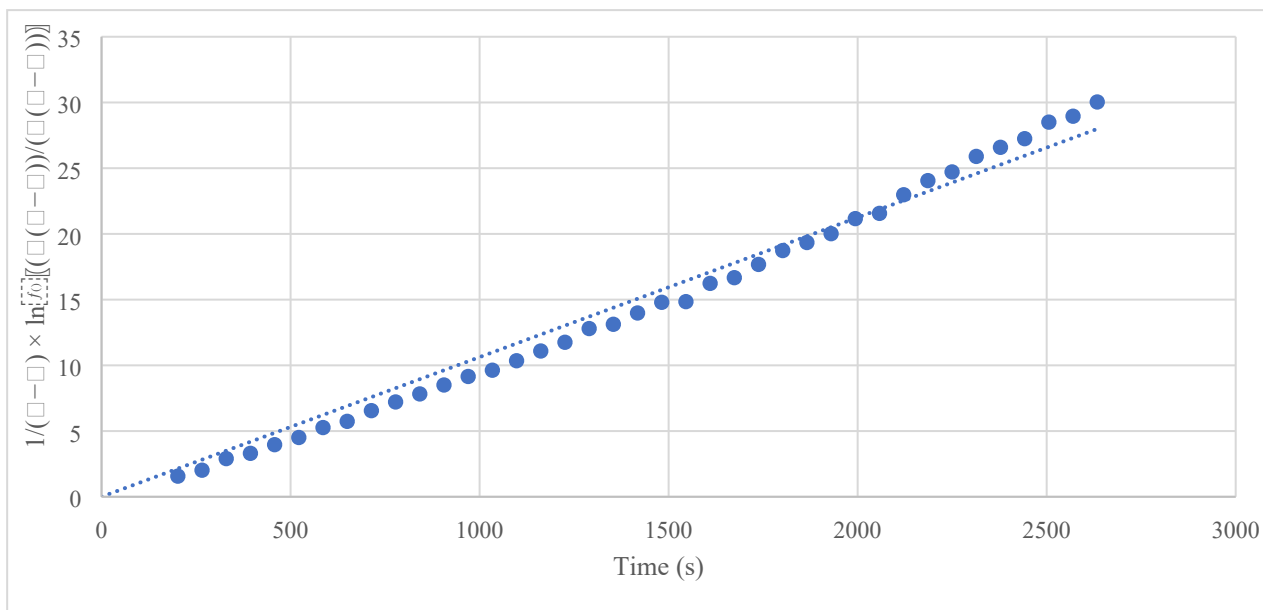

Figure 10: Plot of  $\frac{1}{(a-b)} \times \ln\left(\frac{b(a-x)}{a(b-x)}\right)$  versus the reaction time for 3,5-TPDY cycloaddition with ethyl diazoacetate Run 1

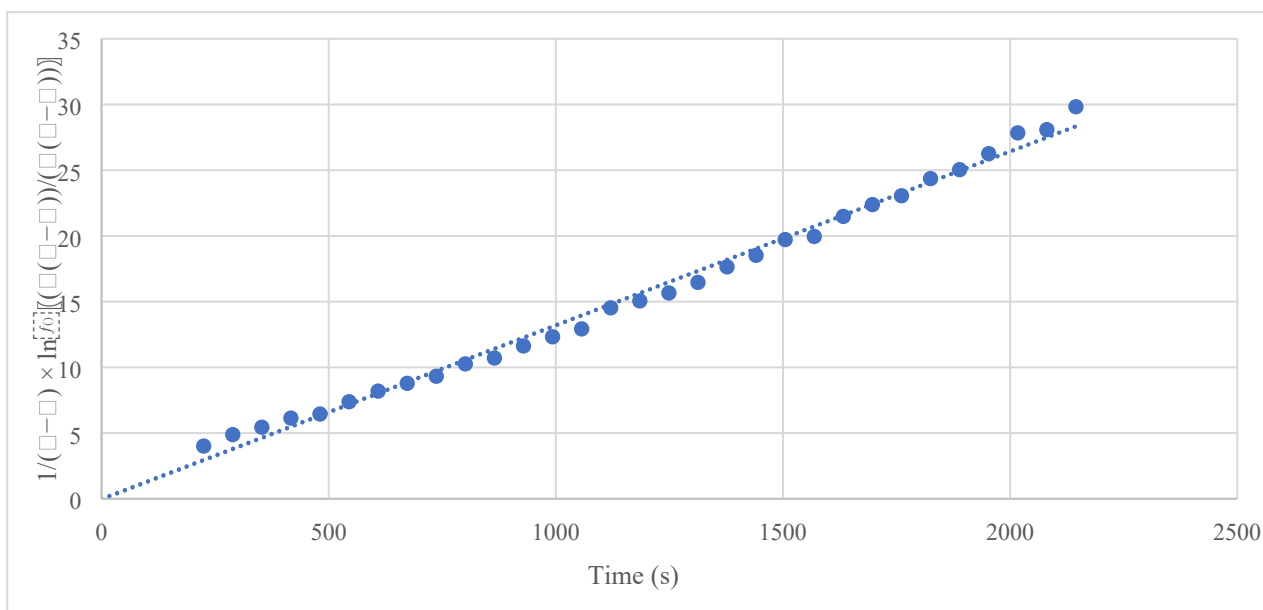

Figure 11: Plot of  $\frac{1}{(a-b)} \times \ln\left(\frac{b(a-x)}{a(b-x)}\right)$  versus the reaction time for 3,5-TPDY cycloaddition with ethyl diazoacetate Run 2

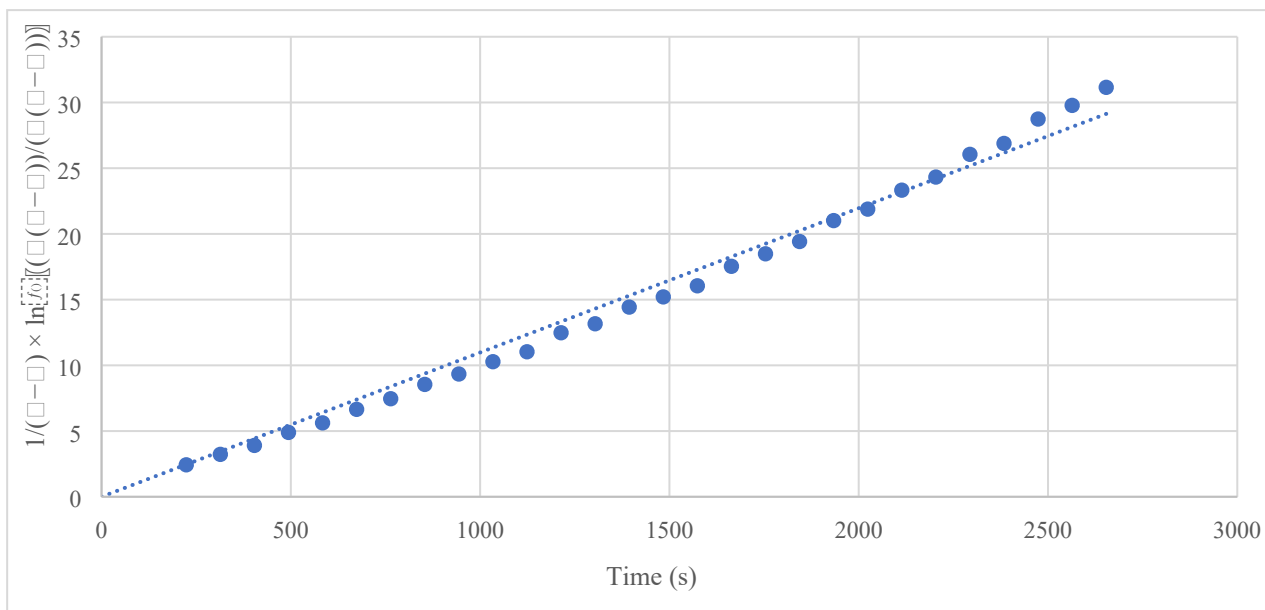

Figure 12: Plot of  $\frac{1}{(a-b)} \times \ln \frac{b(a-x)}{a(b-x)}$  versus the reaction time for 3,5-TPDY cycloaddition with ethyl diazoacetate Run 3

Average rate constant:  $k = 1.2 \times 10^{-2} \text{ M}^{-1} \cdot \text{s}^{-1}$

### 3,5-TPDY Cycloaddition with 3,6-di-2-pyridyl-1,2,4,5-tetrazine

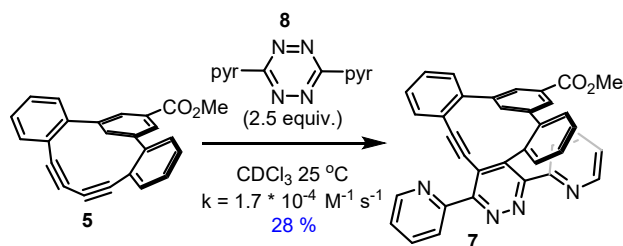

To a solution of 3,5-TPDY (17.9 mg, 0.0535 mmol, 1 eq.) in CH<sub>2</sub>Cl<sub>2</sub> [15 mM] was added 3,6-di-2-pyridyl-1,2,4,5-tetrazine (31.6 mg, 0.134 mmol, 2.5 eq.) and the reaction was stirred at room temperature for 24 h. The solution was then concentrated *in vacuo*. Purification by flash column chromatography (AcOEt in Hexanes) afforded the desired product as a dark yellow solid (8 mg, 28 %).

**<sup>1</sup>H NMR (400 MHz, Chloroform-*d*):**  $\delta$  8.79 – 8.72 (m, 1H), 8.48 – 8.40 (m, 2H), 8.05 (dd,  $J = 1.7$  Hz, 1H), 7.87 (dd,  $J = 1.7$  Hz, 1H), 7.84 – 7.73 (m, 3H), 7.73 – 7.62 (m, 2H), 7.44 (td,  $J = 7.4$ , 1.8 Hz, 1H), 7.40 – 7.30 (m, 2H), 7.30 – 7.18 (m, 4H), 7.16 – 7.09 (m, 1H), 6.99 (td,  $J = 7.7$ , 1.4 Hz, 1H), 6.66 – 6.60 (m, 1H), 3.87 (s, 3H); **<sup>13</sup>C NMR (101 MHz, CDCl<sub>3</sub>):**  $\delta$  167.1, 160.9, 159.4, 156.3, 155.4, 148.9, 148.6, 145.7, 143.2, 141.6, 140.5, 140.4, 137.5, 136.6, 136.2, 136.1, 131.9, 130.4, 130.2, 129.8, 128.2, 128.0, 127.9, 127.4, 127.4, 126.9, 126.1, 125.0, 124.8, 124.1, 123.8, 122.7, 122.7, 104.9, 91.0, 52.3; **HRMS (ESI):**  $m/z$  calculated for C<sub>36</sub>H<sub>22</sub>N<sub>4</sub>O<sub>2</sub> [M+H]<sup>+</sup>, 543.1816; found: 543.1817.

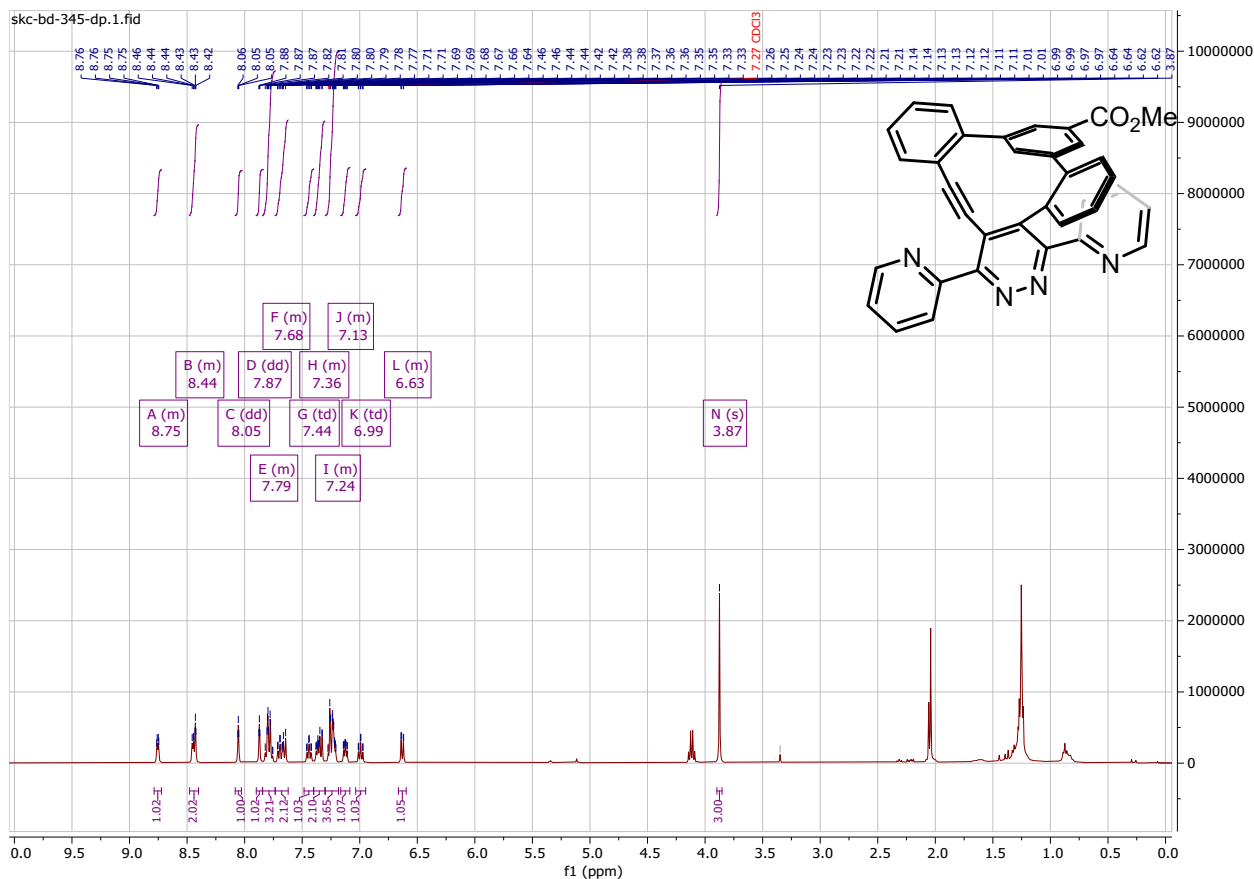

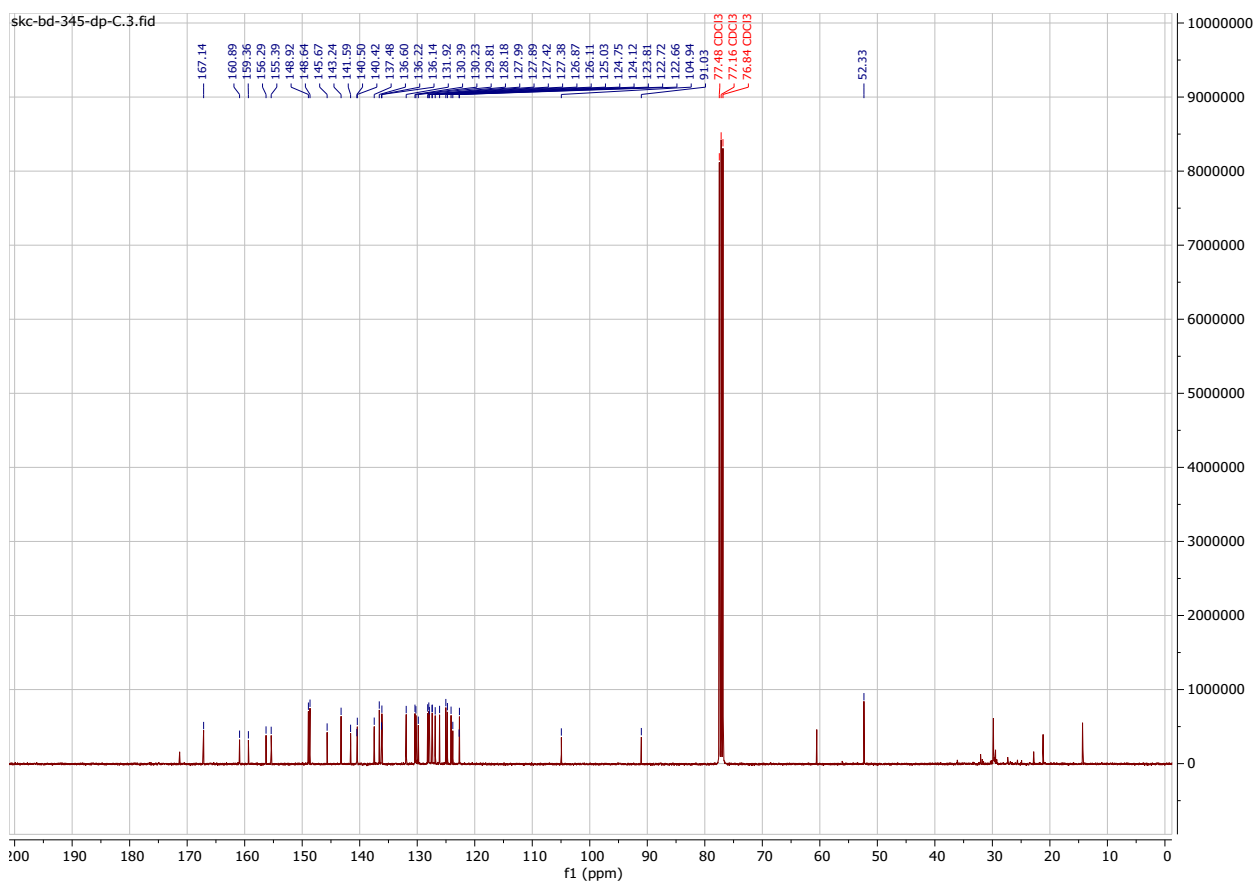

Kinetics measurements were taken every 40 min for 33 hours

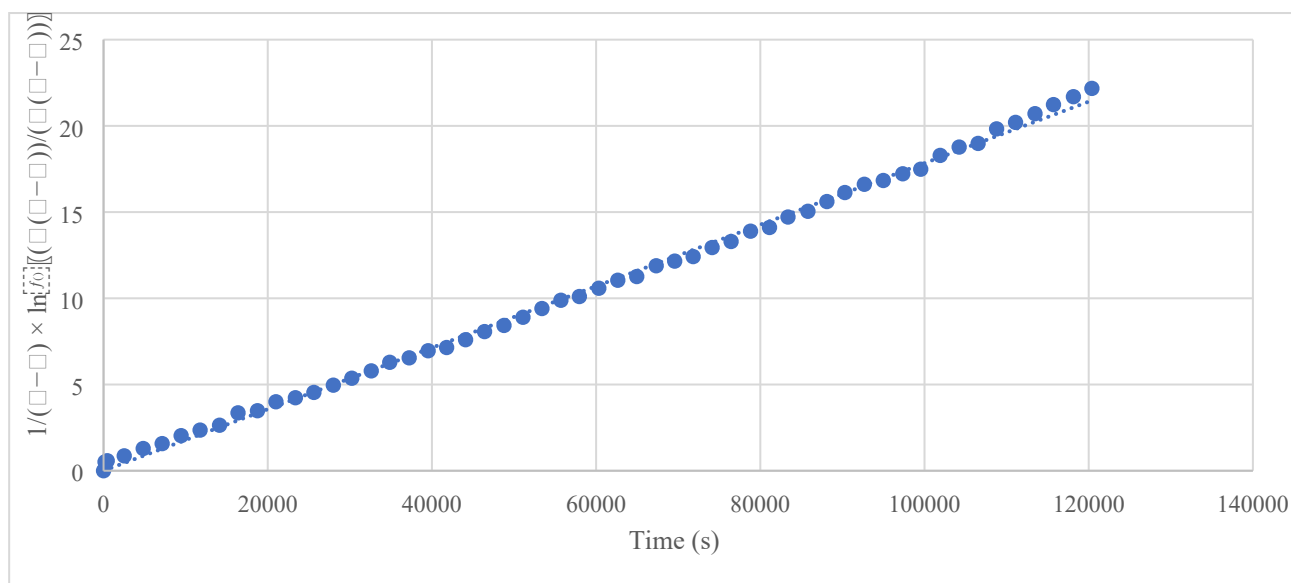

Figure 13: Plot of  $\frac{1}{(a-b)} \times \ln \frac{b(a-x)}{a(b-x)}$  versus the reaction time for 3,5-TPDY cycloaddition with 3,6-di-2-pyridyl-1,2,4,5-tetrazine Run 1

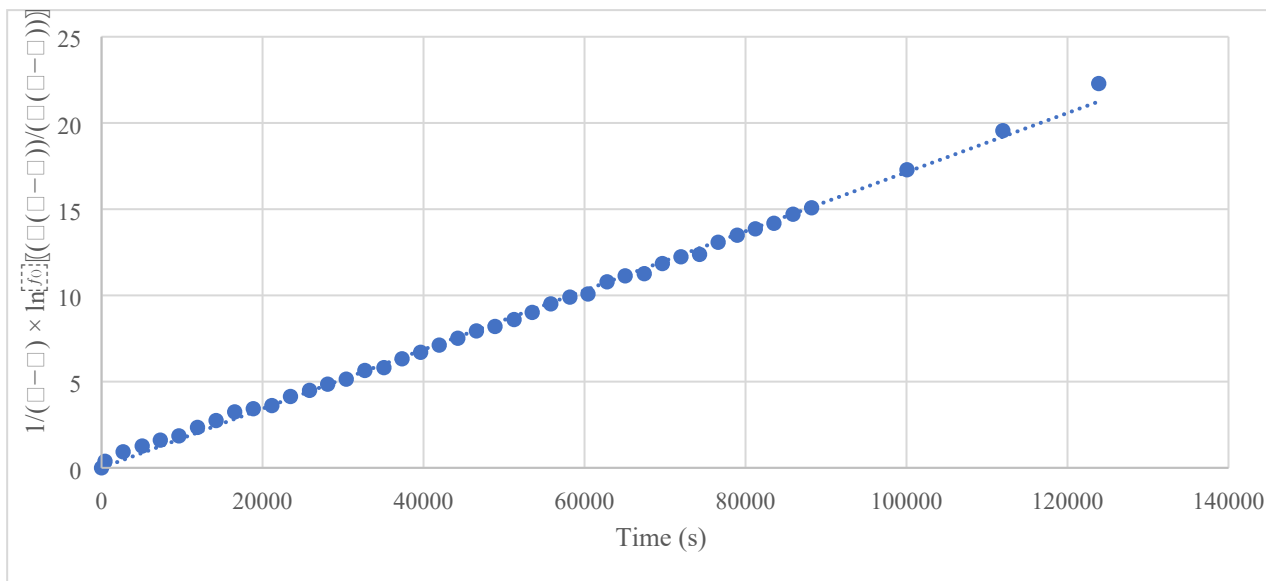

Figure 14: Plot of  $\frac{1}{(a-b)} \times \ln \frac{b(a-x)}{a(b-x)}$  versus the reaction time for 3,5-TPDY cycloaddition with 3,6-di-2-pyridyl-1,2,4,5-tetrazine Run 2

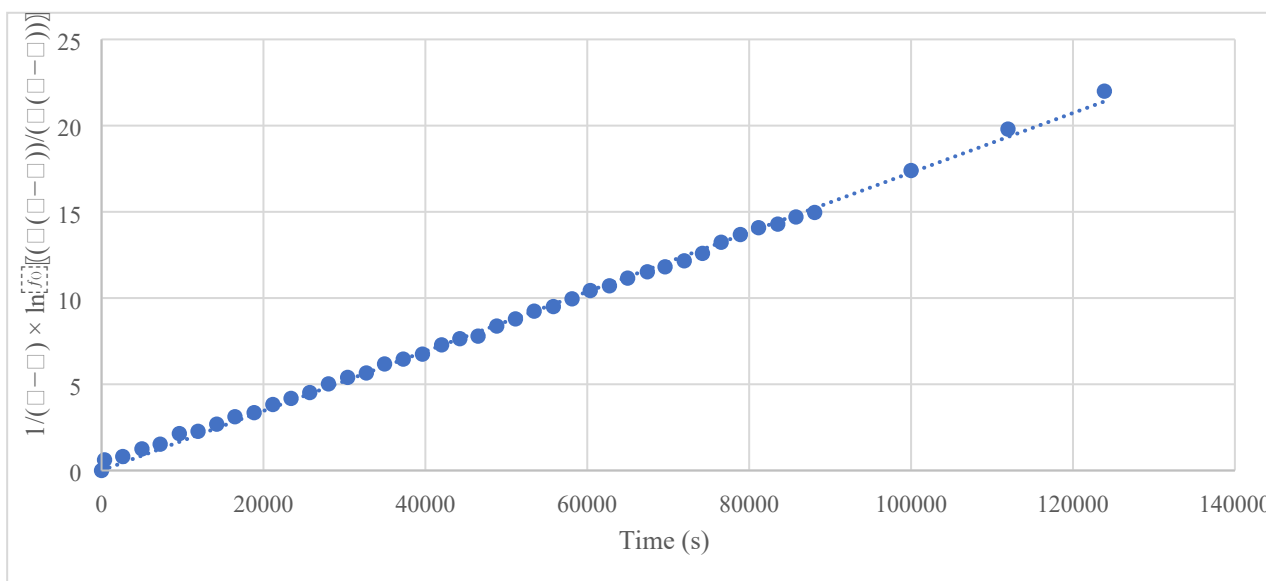

Figure 15: Plot of  $\frac{1}{(a-b)} \times \ln \frac{b(a-x)}{a(b-x)}$  versus the reaction time for 3,5-TPDY cycloaddition with 3,6-di-2-pyridyl-1,2,4,5-tetrazine Run 3

Average rate constant:  $k = 1.7 \times 10^{-4} \text{ M}^{-1}\cdot\text{s}^{-1}$

## **Bioligation Experiments**

### **MTG expression and purification**

mTG expression and purification and activity assay were performed as previously reported.<sup>1</sup> Activity greater than 20 U/mg of purified mTG was assessed, and purity was determined over 85% on 15% reducing SDS-PAGE.

### **hFc expression and purification**

*E. coli* Shuffle T7 express transformed with pET-22b hFc and SOX plasmid were propagated overnight at 37 °C, 230 rpm in a 20 mL LB preculture with ampicillin (100 µg/mL) and chloramphenicol (50 µg/mL). A culture of LB media (500 mL) containing ampicillin and chloramphenicol was inoculated with an initial OD<sub>600</sub> of 0.1 and propagated at 37 °C, 230 rpm. When OD<sub>600</sub> reached 0.7-1.0, protein expression was induced by addition of 1 mM IPTG and the culture was incubated overnight at 22 °C, 230 rpm. Cells were pelleted at 5 500 ×g for 10 min and resuspended in 30 mL of IMAC-A buffer (50 mM Tris-HCl pH 8, 600 mM NaCl, 20 mM imidazole). The cell suspension was lysed using 3 cycles of 30 s sonication with 30 s rest on ice between cycles. The lysate was centrifuged at 50 000 ×g and filtered through 0.22 micron and applied to a 1 mL HisTrap Ni-NTA column (Cytiva) at a flow rate of 1 mL/min pre-equilibrated with IMAC-A buffer. After flow-through elution, the column was washed with 5 CV of 5% IMAC-B buffer (50 mM Tris-HCl pH 8, 600 mM NaCl, 500 mM imidazole), followed by protein elution through 10 CV of 100% IMAC-B buffer. Fractions (1 mL) were pooled according to the A<sub>280</sub> peak and dialyzed overnight against PBS buffer pH 7.2 (137 mM NaCl, 2.7 mM KCl, 9.2 mM Na<sub>2</sub>HPO<sub>4</sub>, 1.8 mM KH<sub>2</sub>PO<sub>4</sub>) at 4 °C. Protein was concentrated to 5 mg/mL using a 15 mL Amicon (Millipore Sigma, MWCO 10 kDa), supplemented with 10% glycerol and stored at -72 °C. Protein concentration was measured at 280 nm using a theoretical extinction coefficient of 71680 M<sup>-1</sup>cm<sup>-1</sup> and a molecular weight of 54 kDa. Protein purity greater than 85% and proper folding of hFc was assessed on a 15% non-reducing SDS-PAGE gel.

### **GB1 expression and purification**

*E. coli* BL21 (DE3) transformed with the pET-15b Gb1 I6Q variant were propagated overnight at 37°C, 230 rpm in a 20 mL LB preculture with ampicillin (100 µg/mL). The culture of LB media (500 mL) with ampicillin was inoculated at an initial OD<sub>600</sub> of 0.1 and propagated at 37°C, 230 rpm. When the OD<sub>600</sub> reached 0.7-1.0, protein expression was carried out by adding 1 mM IPTG and the culture was incubated overnight at 22°C, 230 rpm. Cells were pelleted at 5,500 ×g for 10 min and resuspended in 30 mL IMAC-A buffer. The cell suspension was lysed by 3 cycles of 30 s sonication with 30 s rest on ice between cycles. The lysate was centrifuged at 50,000 ×g, filtered through 0.22 micron and applied to a 1 mL HisTrap Ni-NTA column (Cytiva) at a flow rate of 1 mL/min, pre-equilibrated with IMAC-A buffer. After flow-through elution, the column was washed with 5 CV of 5% IMAC-B buffer followed by protein elution through 10 CV of 100% IMAC-B buffer. Fractions (1 mL) were pooled according to the A<sub>280</sub> peak, and buffer exchanged with a 5 mL HiTrap desalting column (Cytiva) to PBS buffer pH 7.2 at 4 °C. Protein was concentrated to 5 mg/mL using a 15 mL Amicon (MWCO 3 kDa, Millipore Sigma), supplemented with 10% glycerol and stored at -72 °C. Protein concentration was measured at 280 nm using a theoretical extinction coefficient of 9970 M<sup>-1</sup>cm<sup>-1</sup> and a molecular weight of 8475 Da. Protein purity greater than 85% was assessed on a 10% reducing tricine gel.

---

<sup>1</sup> Deweid, L.; Hadjabdelhafid-Parisien, A.; Lafontaine, K.; Rochet, L. N. C.; Kolmar, H.; Pelletier, J. N., Chapter Five - Glutamine-walking: Creating reactive substrates for transglutaminase-mediated protein labeling. In *Methods Enzymol.*, Tawfik, D. S., Ed. Academic Press: 2020; Vol. 644, pp 121-148.

## SDS-PAGE analysis of conjugation reaction to proteins

Proteins (hFc or Gb1, 50  $\mu$ M) were incubated in presence of 3,5-TPDY-PEG-NH<sub>3</sub>Cl (1 mM), sulfo-Cy5 azide (2 mM, Lumiprobe) and mTG (5  $\mu$ M) in PBS buffer pH 7.2, 15% (v/v) DMSO at room temperature. Control reactions were run in the absence of mTG to evaluate background fluorescence on gels and in presence N-(1R,8S,9s)-Bicyclo[6.1.0]non-4-yn-9-ylmethyloxycarbonyl-1,8-diamino-3,6-dioxaoctane (BCN-amine, 1 mM, VWR) as a reference for mTG conjugation. Reactions were stopped by adding of 4% (v/v) formic acid and aliquots (10  $\mu$ L) were resolved on 16,5% reducing tricine gels (Gb1) or 15% non-reducing tris-glycine SDS-PAGE gel (hFc). Fluorescence was revealed with an iBright FL1500 imaging system (ThermoFischer) using the Cy5 filter (Ex 608-632 nm, Em 675-720 nm) with an exposure time of 500 ms prior to Coomassie staining. Fluorescence intensity was quantified using ImageJ software.

## Figures for additional MTG-mediated conjugation of B domain of protein G (Gb1).

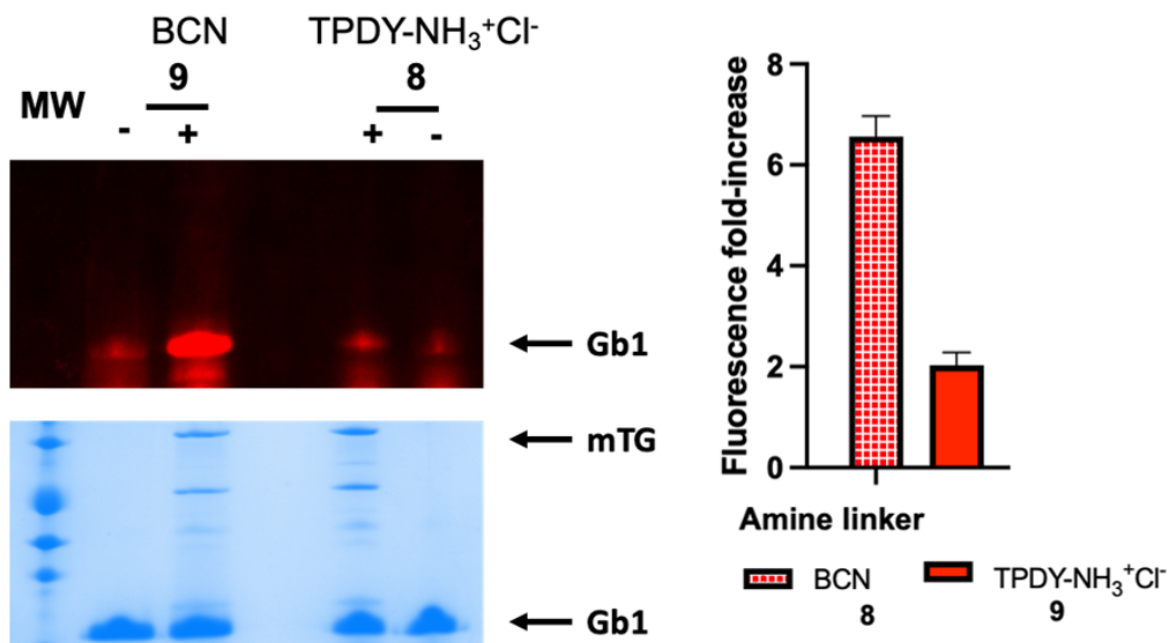

Figure S16: MTG-mediated conjugation of B domain of protein G (Gb1). Upper gel image: Fluorescence of sulfo-Cy-5 (500 ms exposure) Lower gel image: Coomassie stained to confirm equal loading of the protein. MW: molecular weight marker. The presence/absence (+ or -) of mTG is indicated. The bar graph represents fluorescence-fold increase relative to background (no mTG) for each reaction.

## Thiol competition experiments.

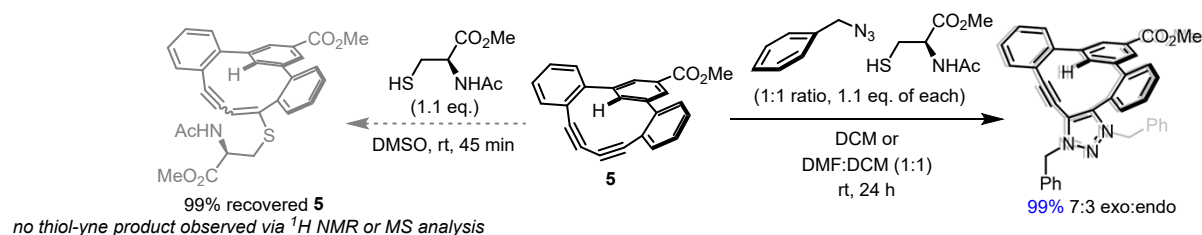

# NMR SPECTRA

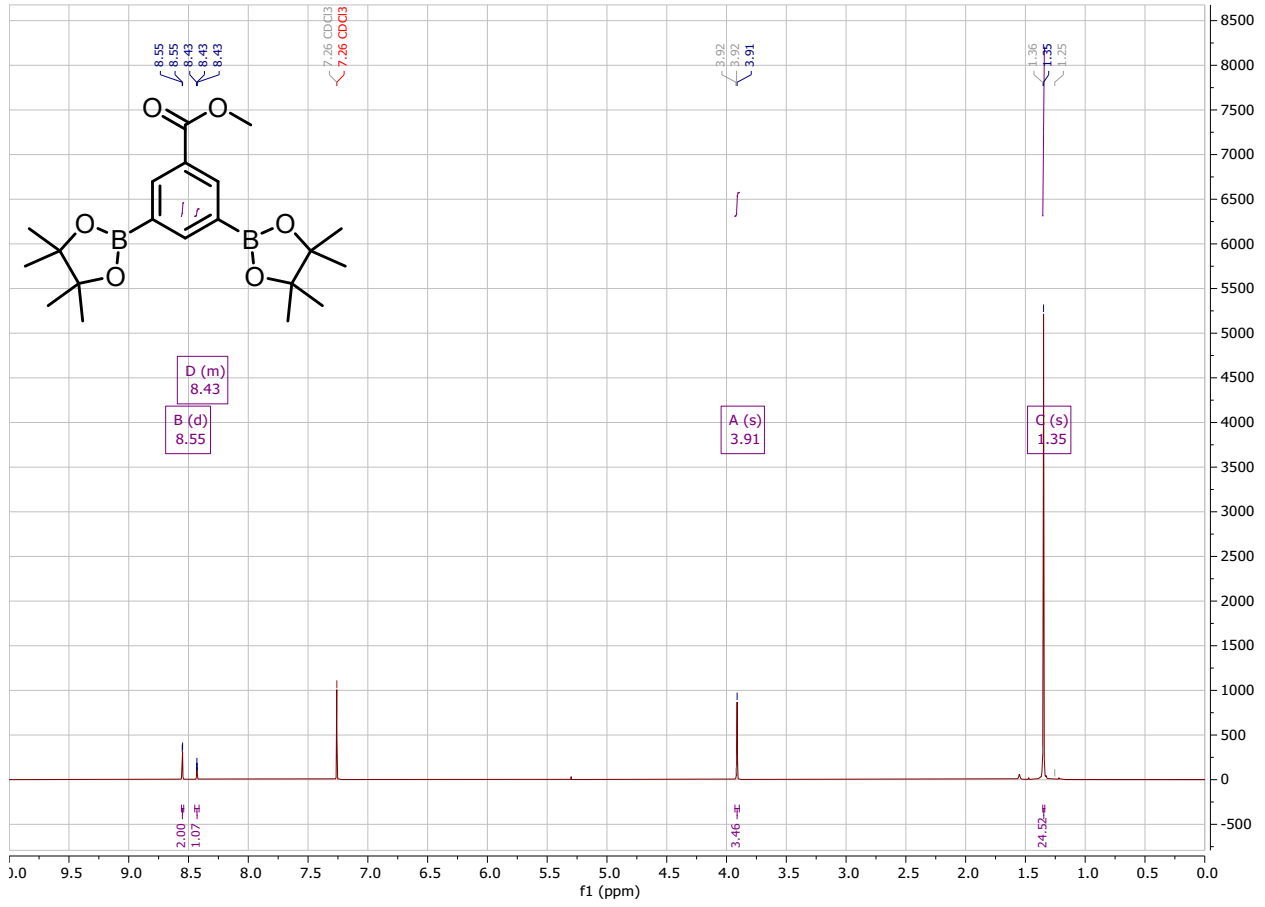



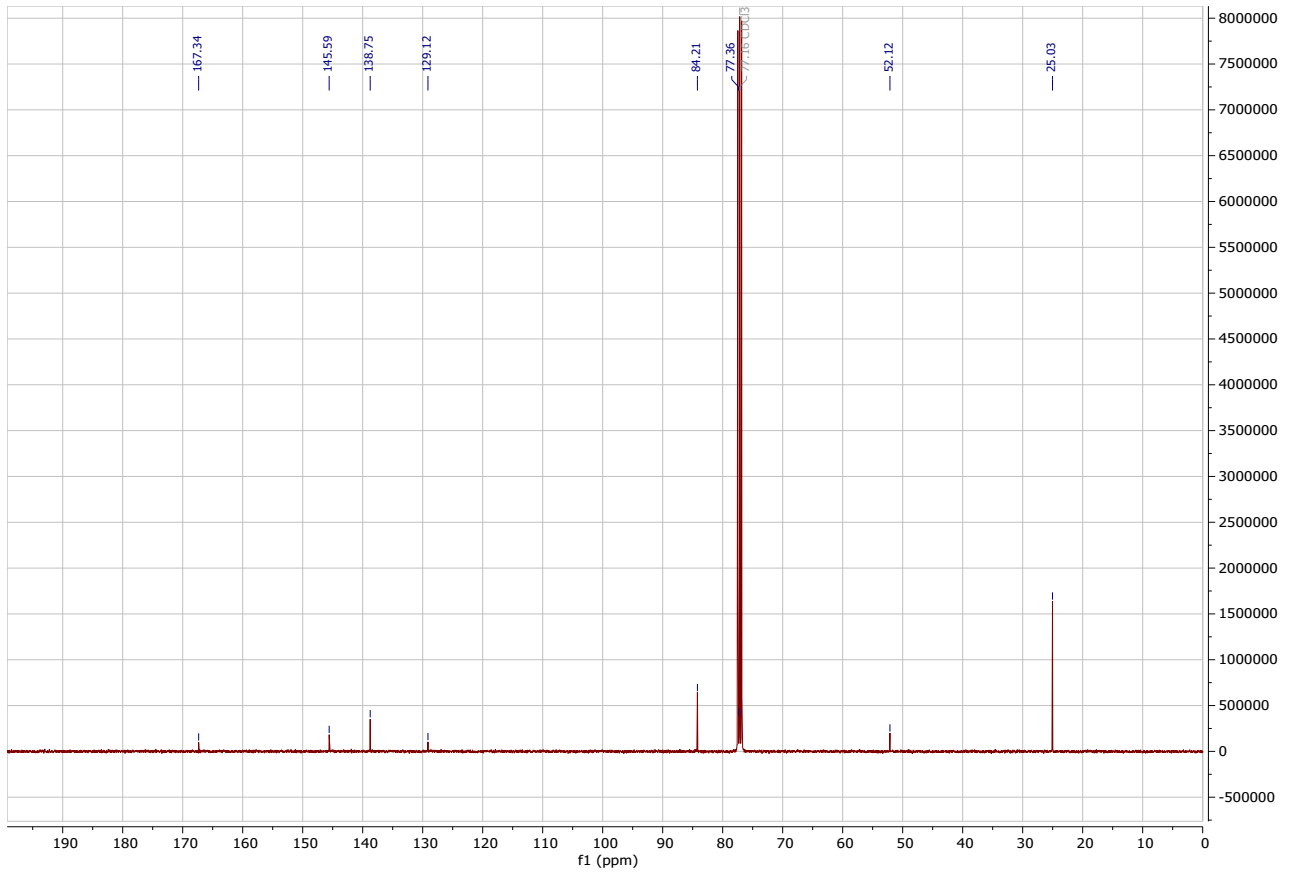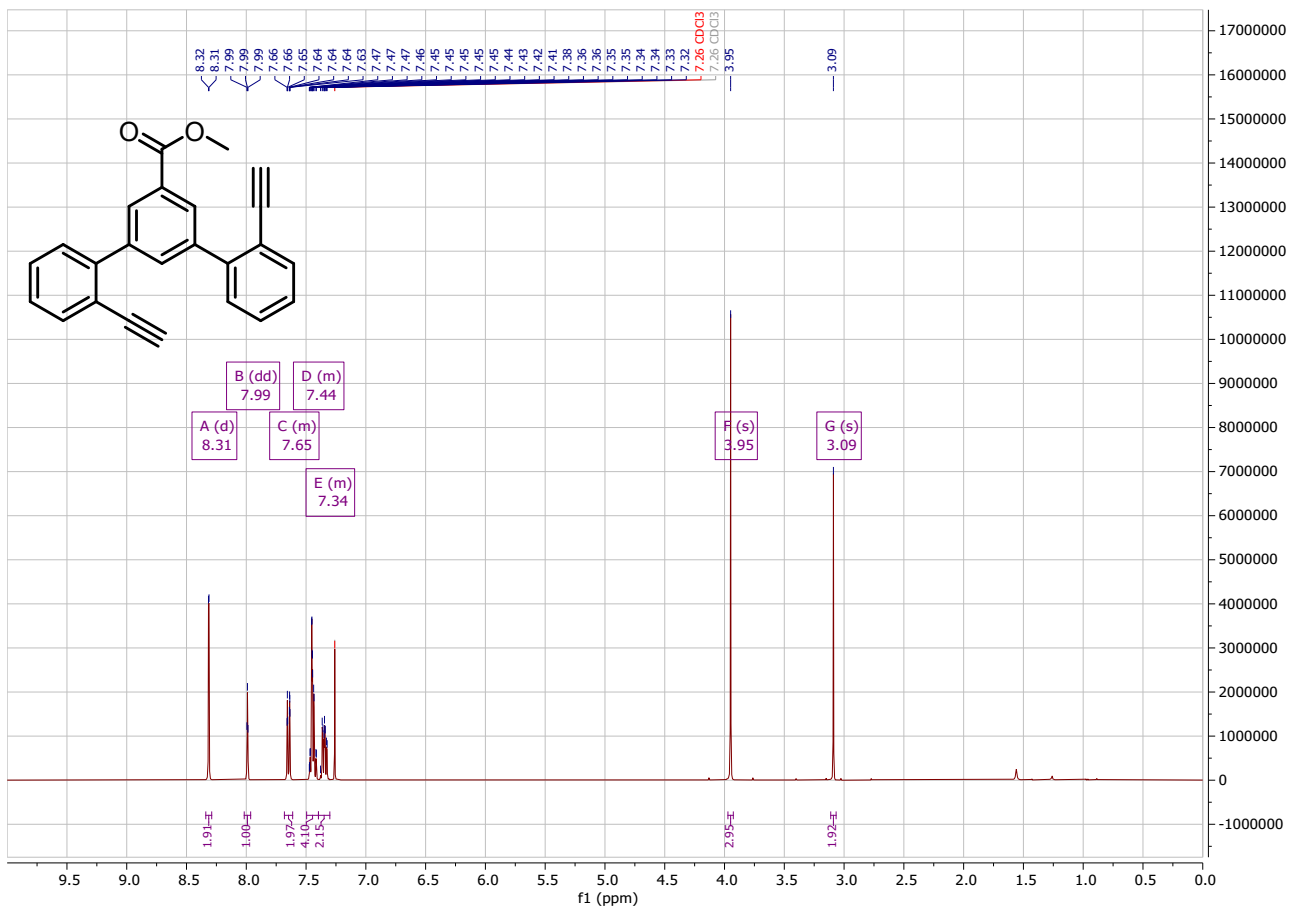

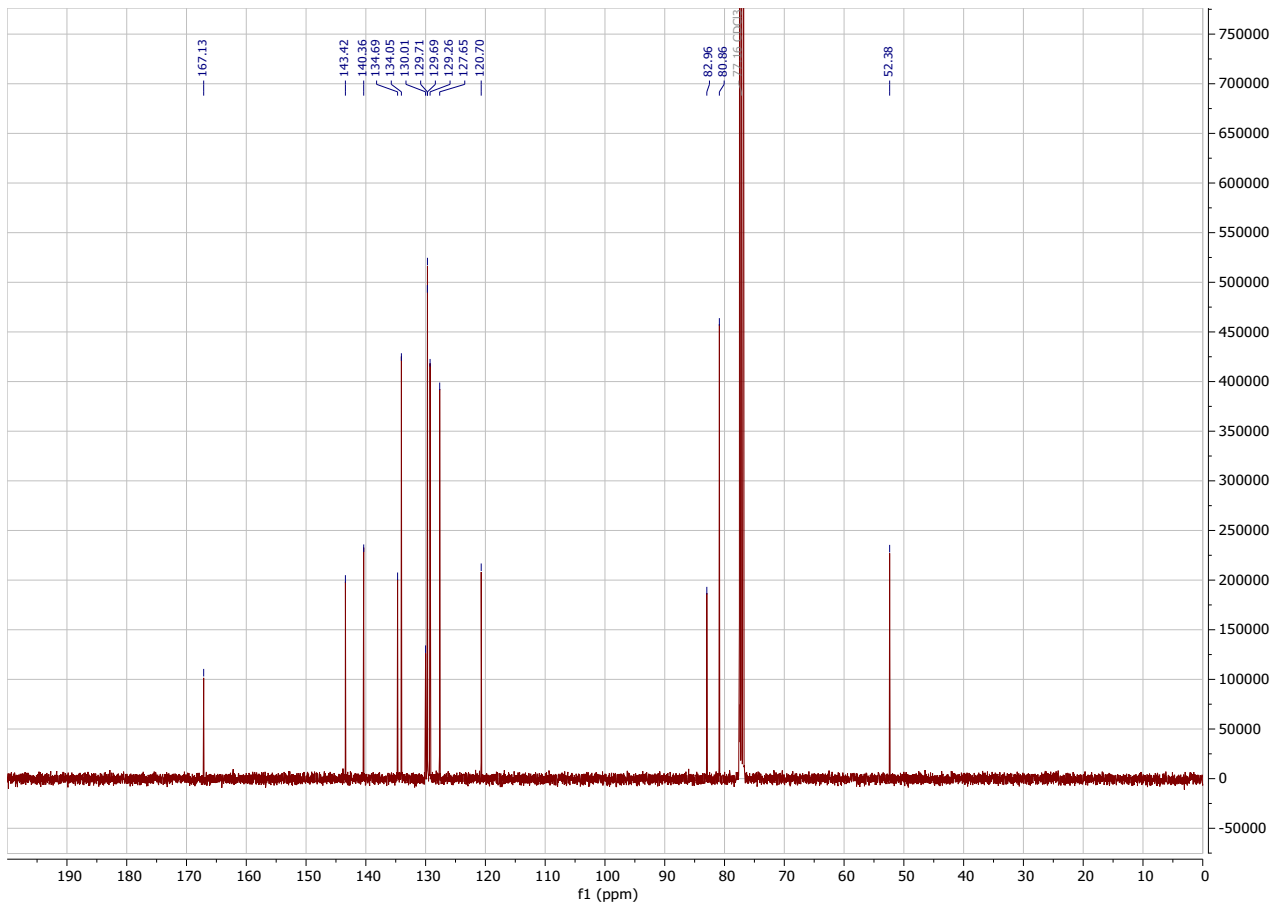

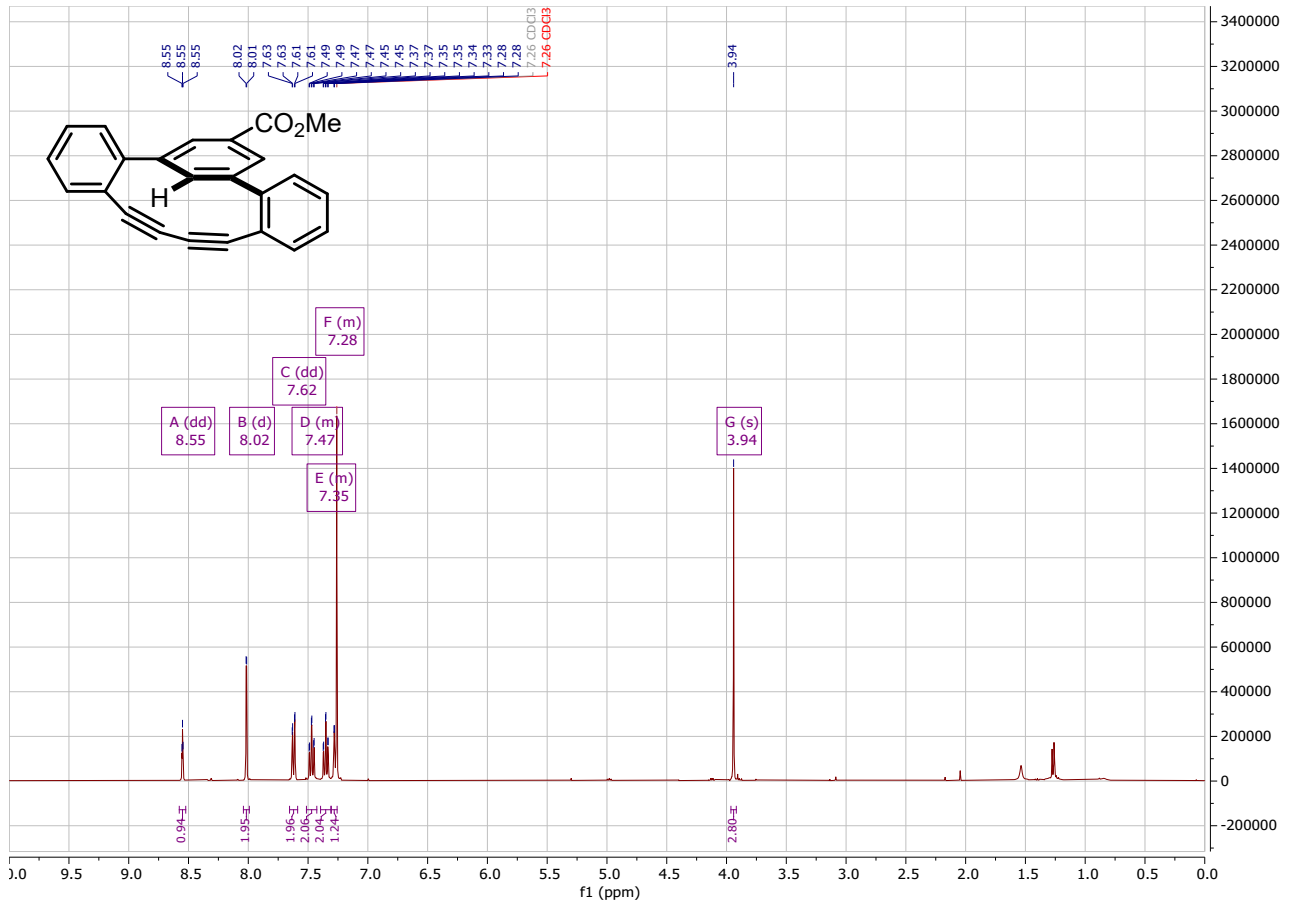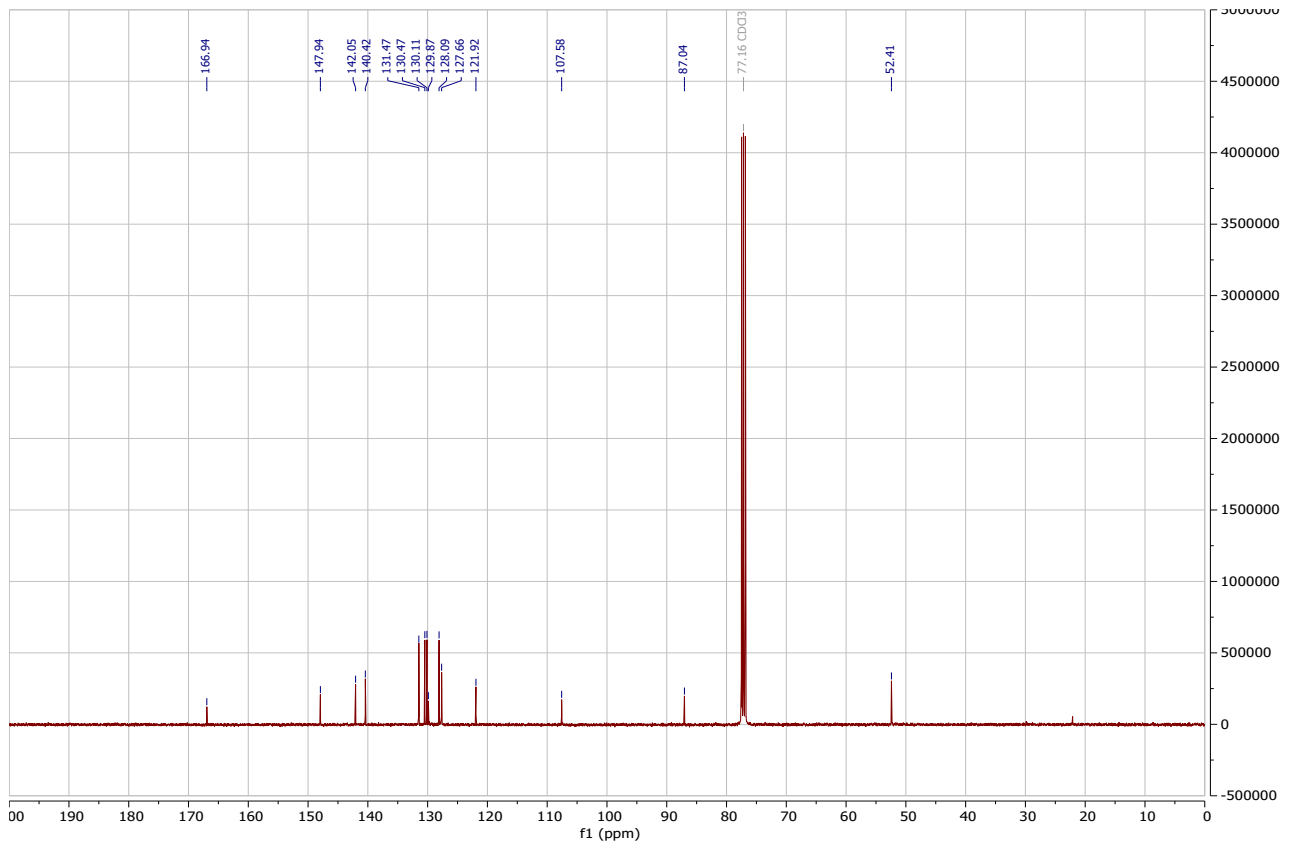

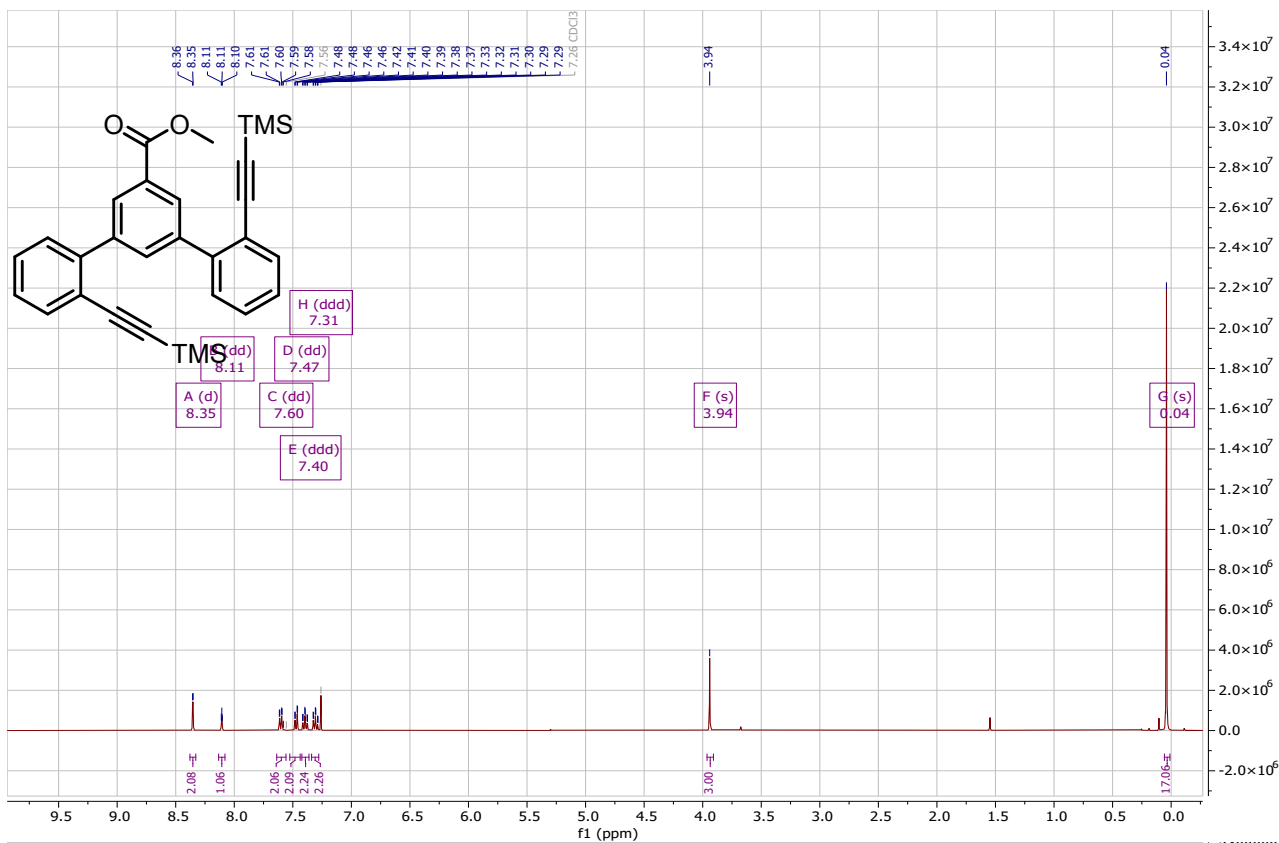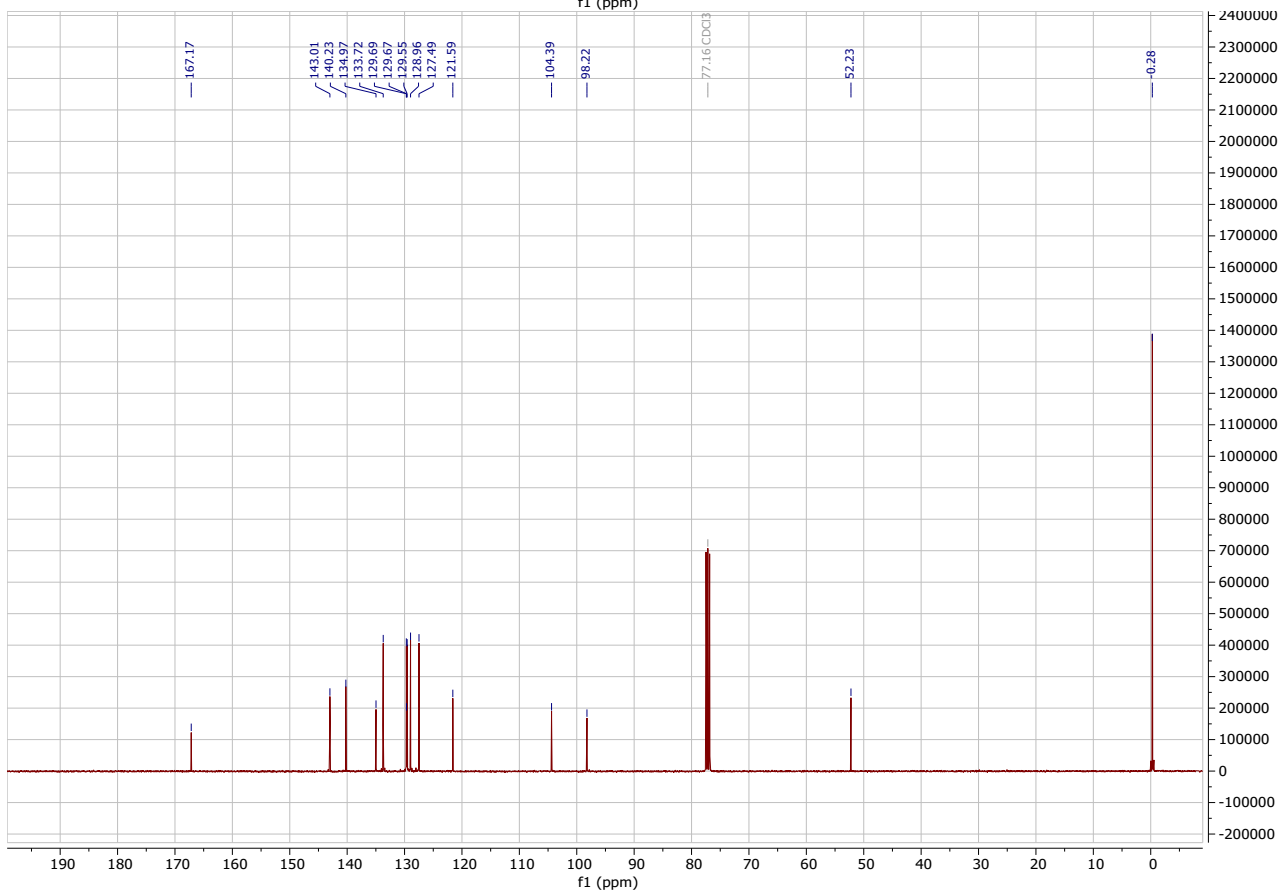

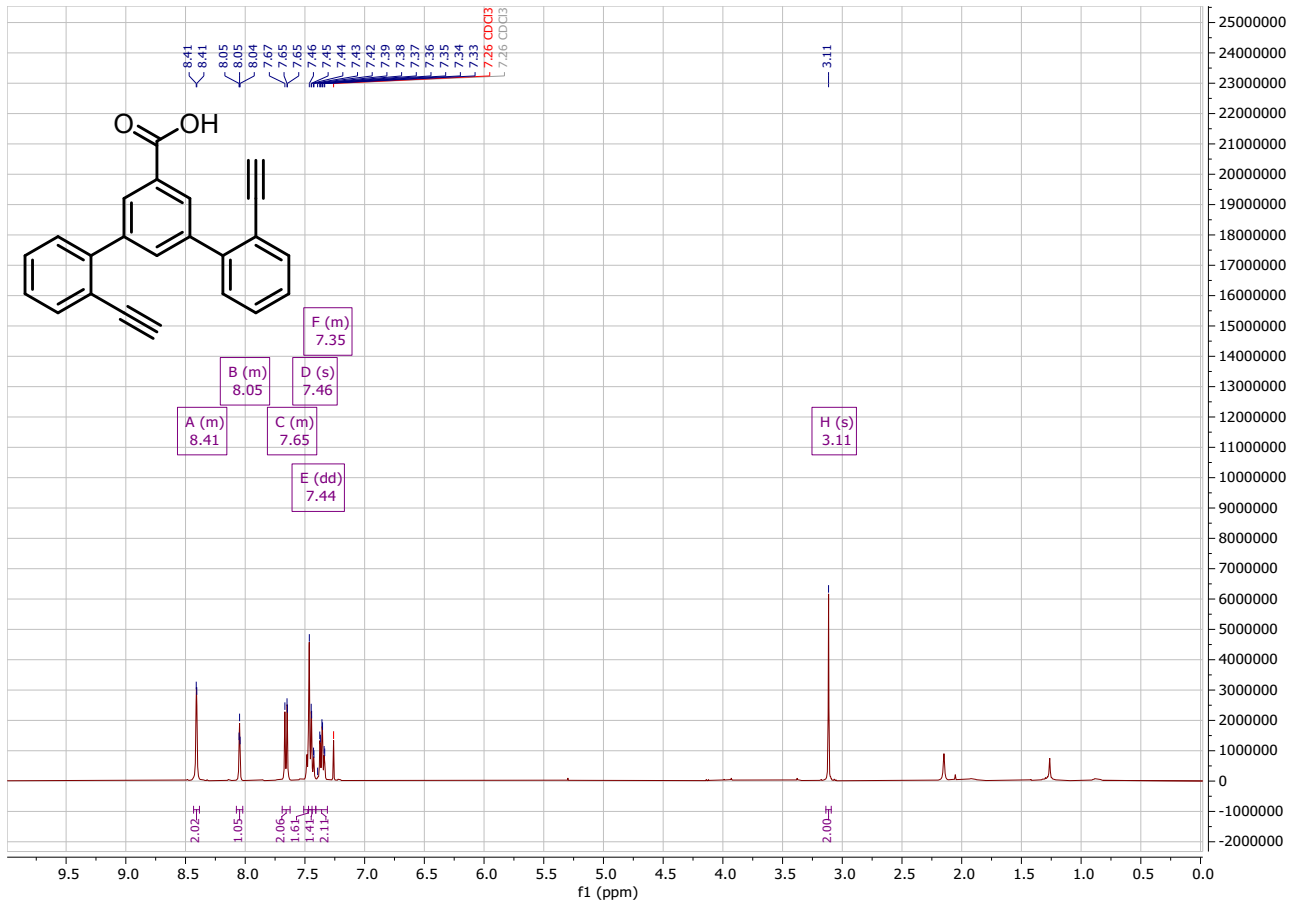

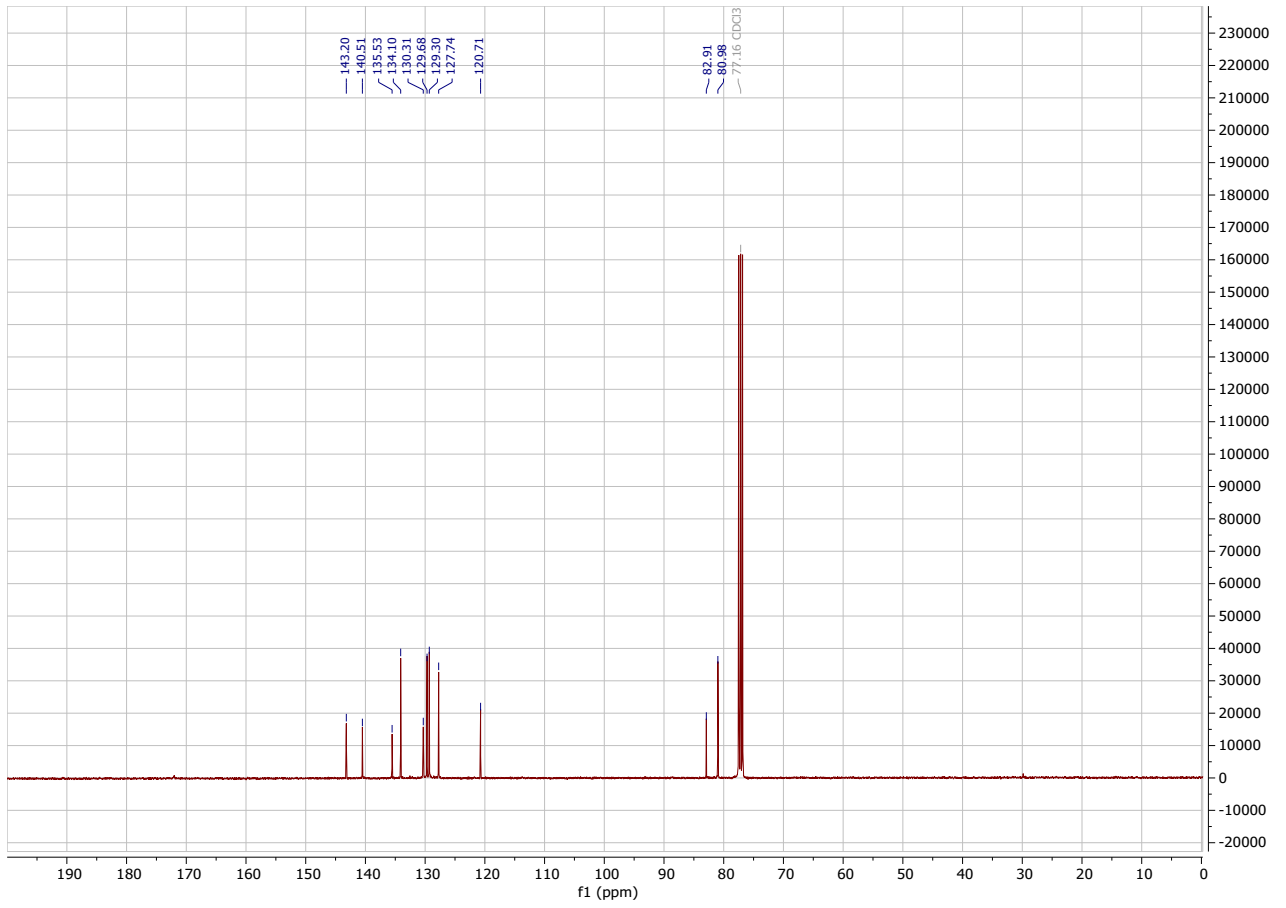

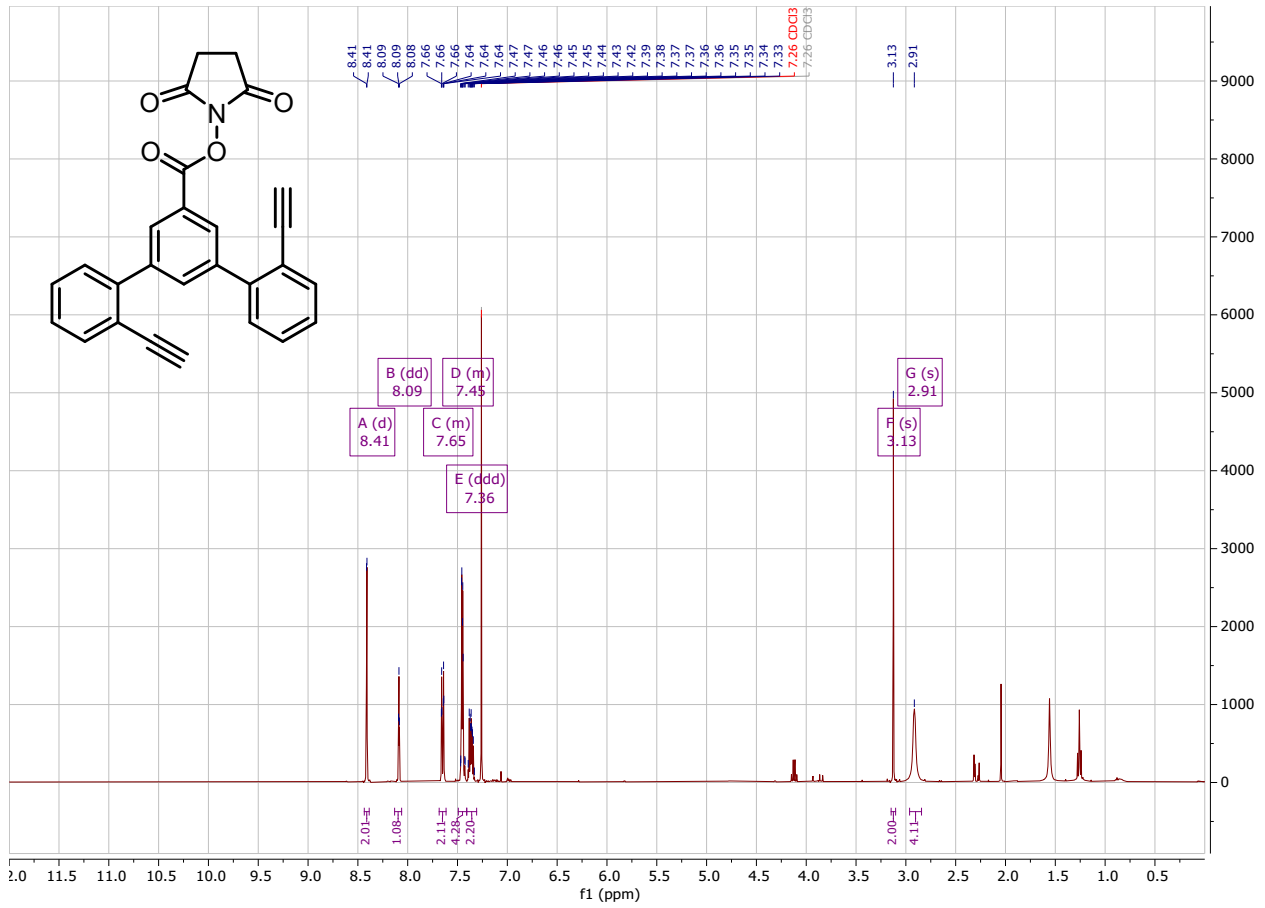

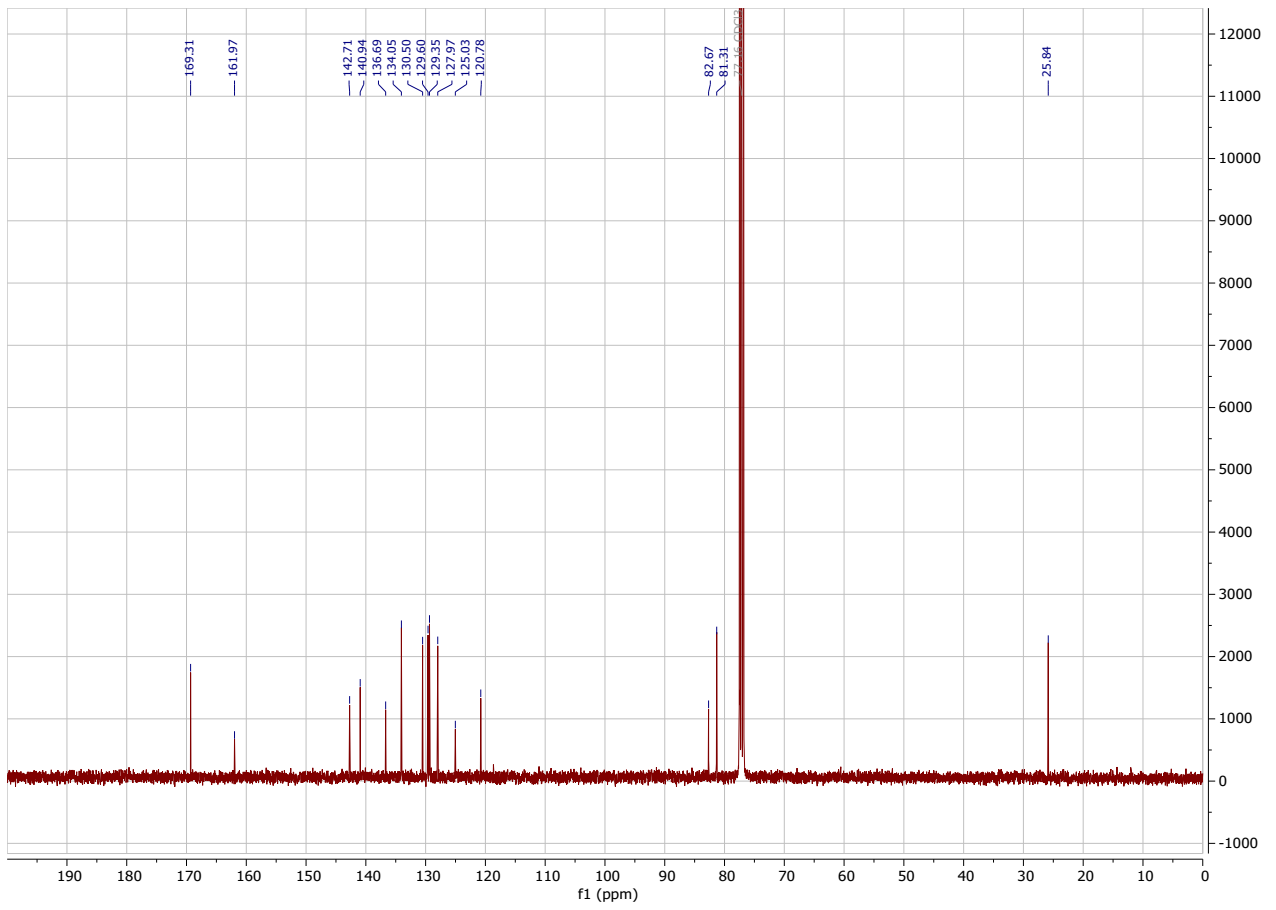



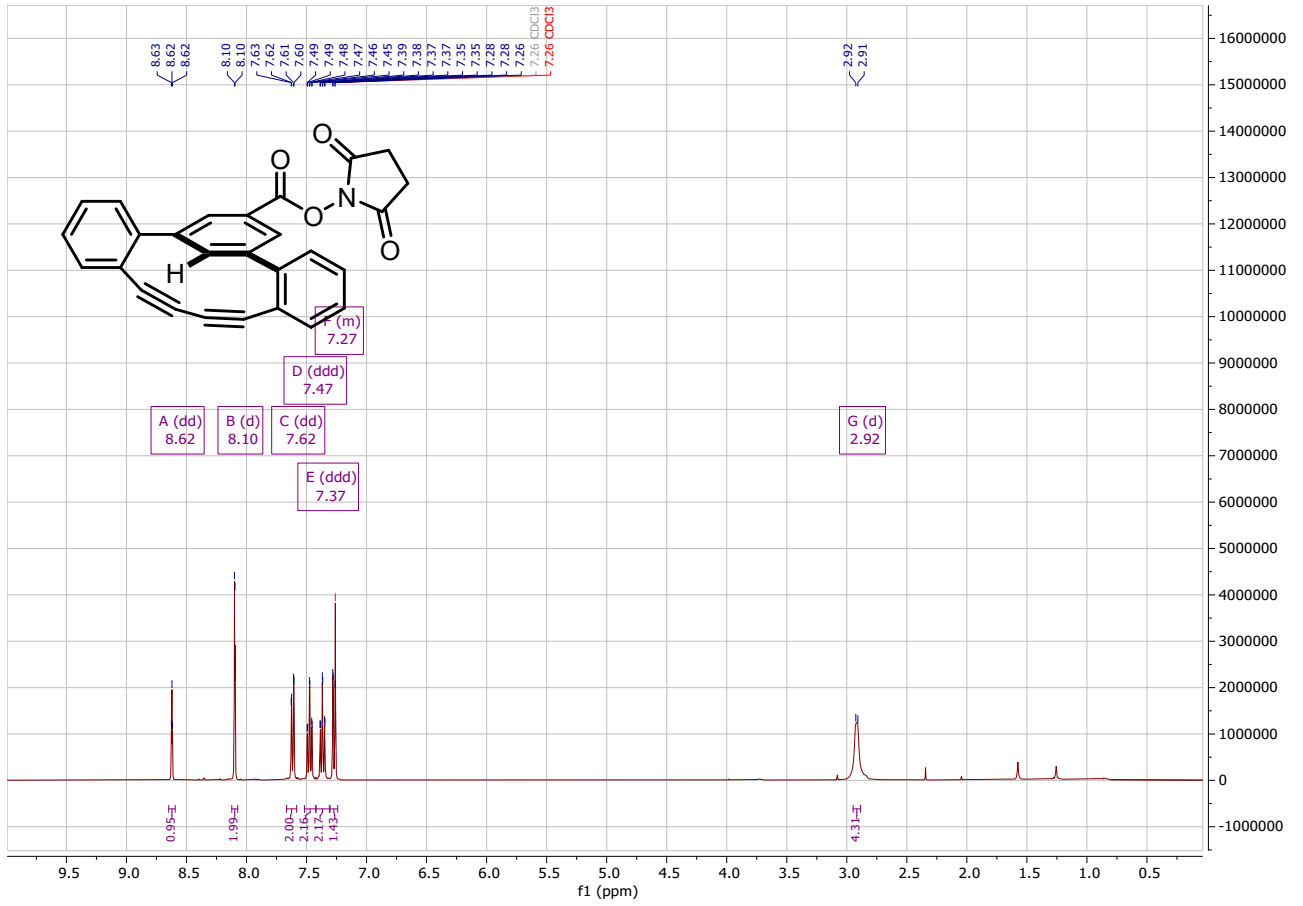

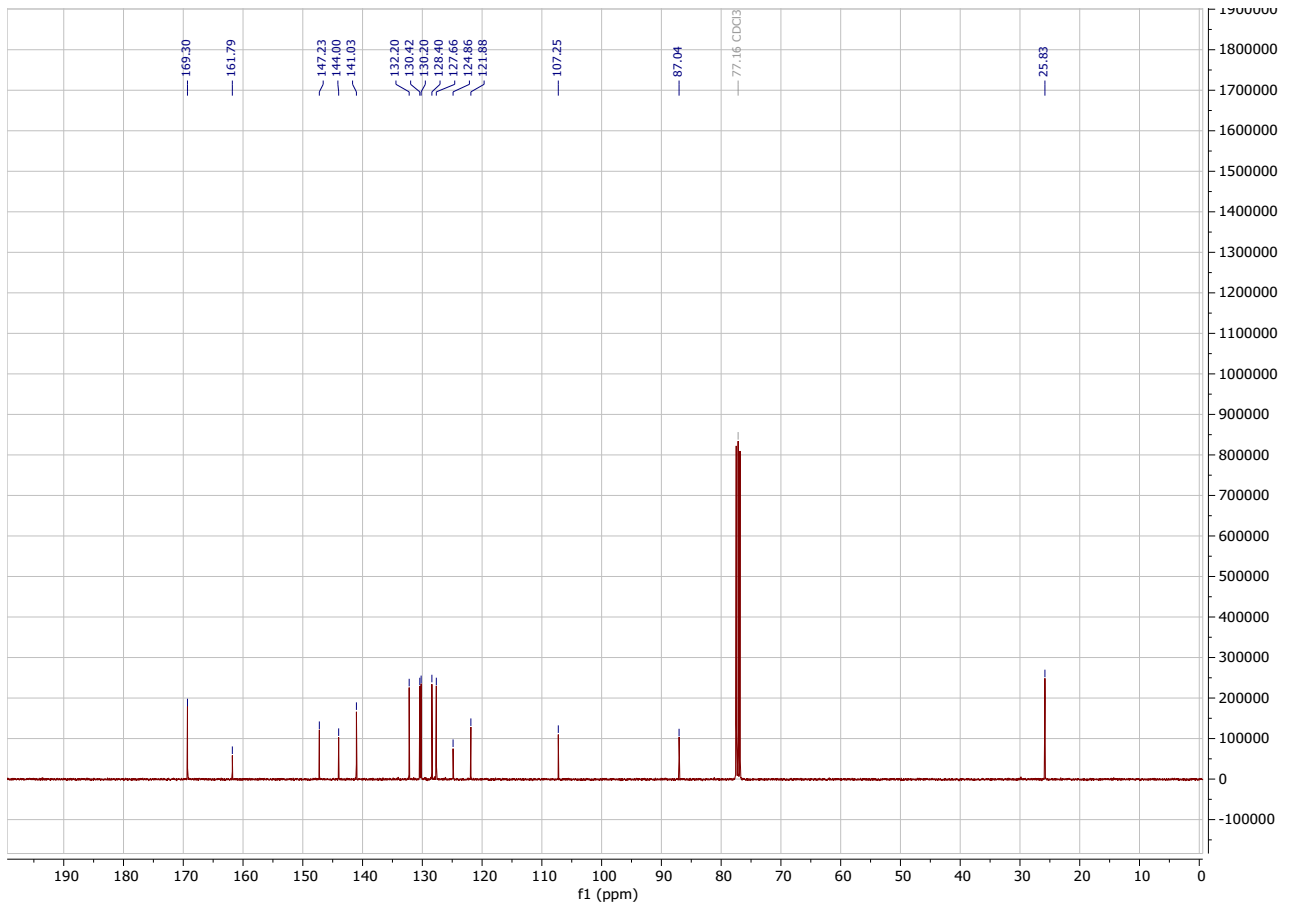

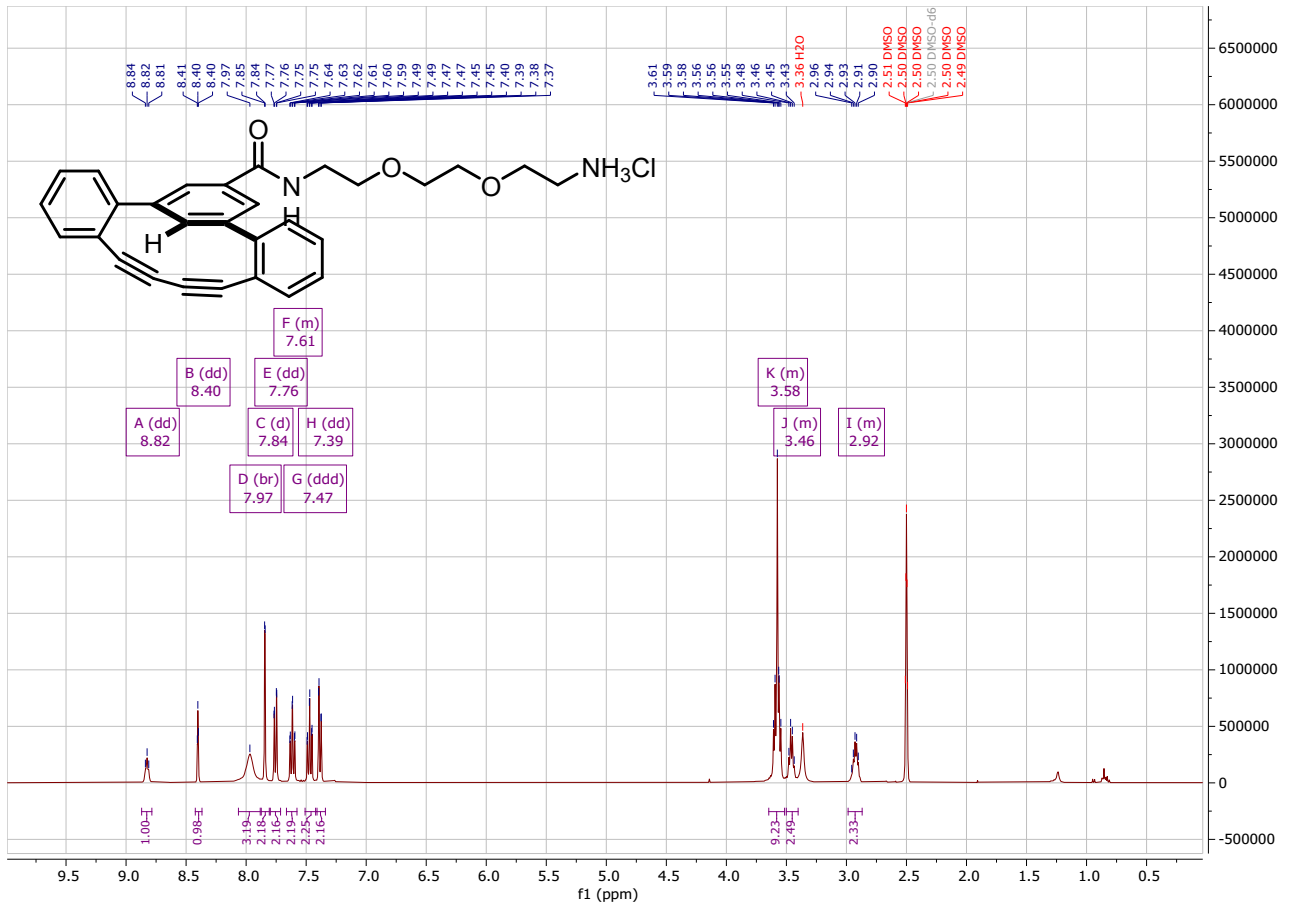

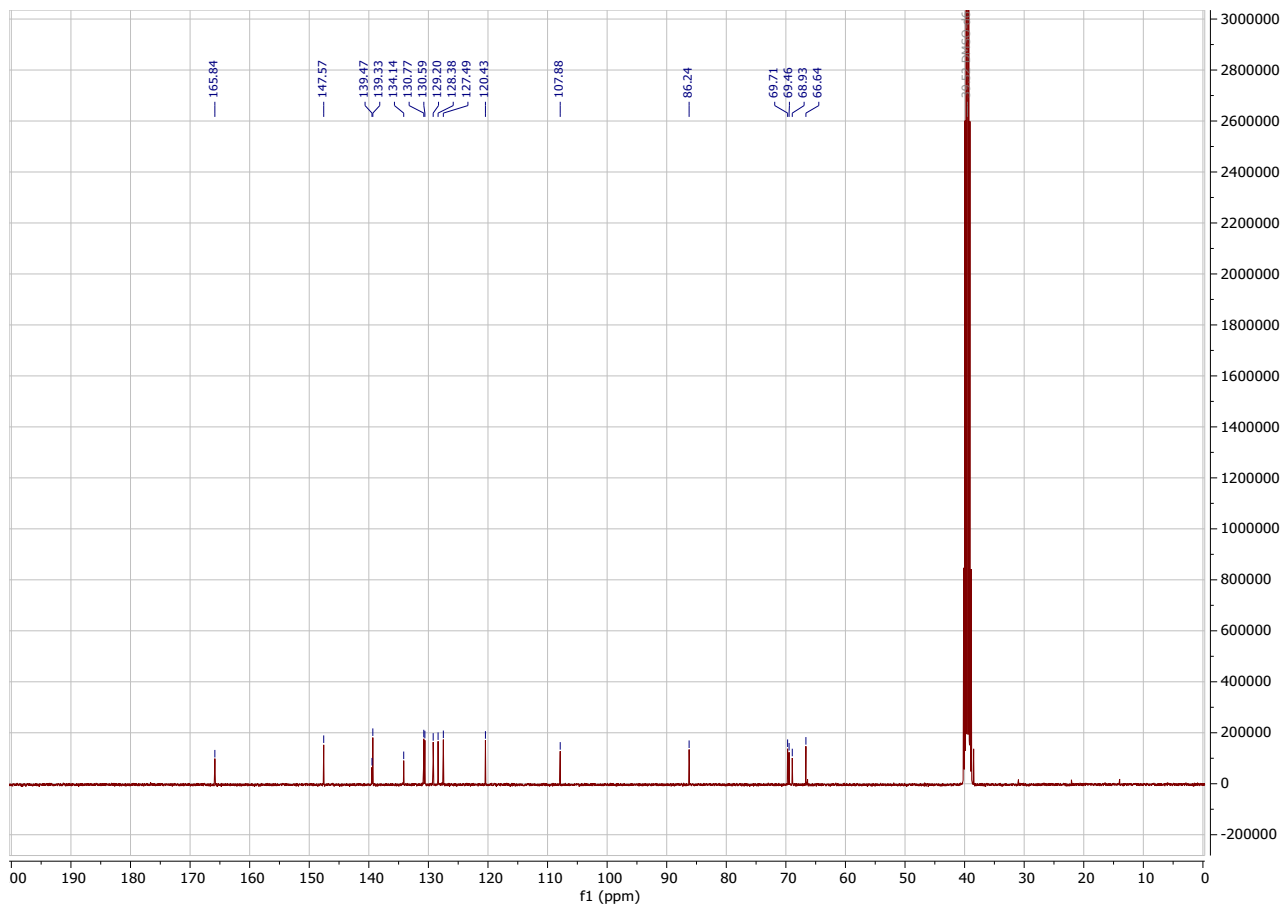



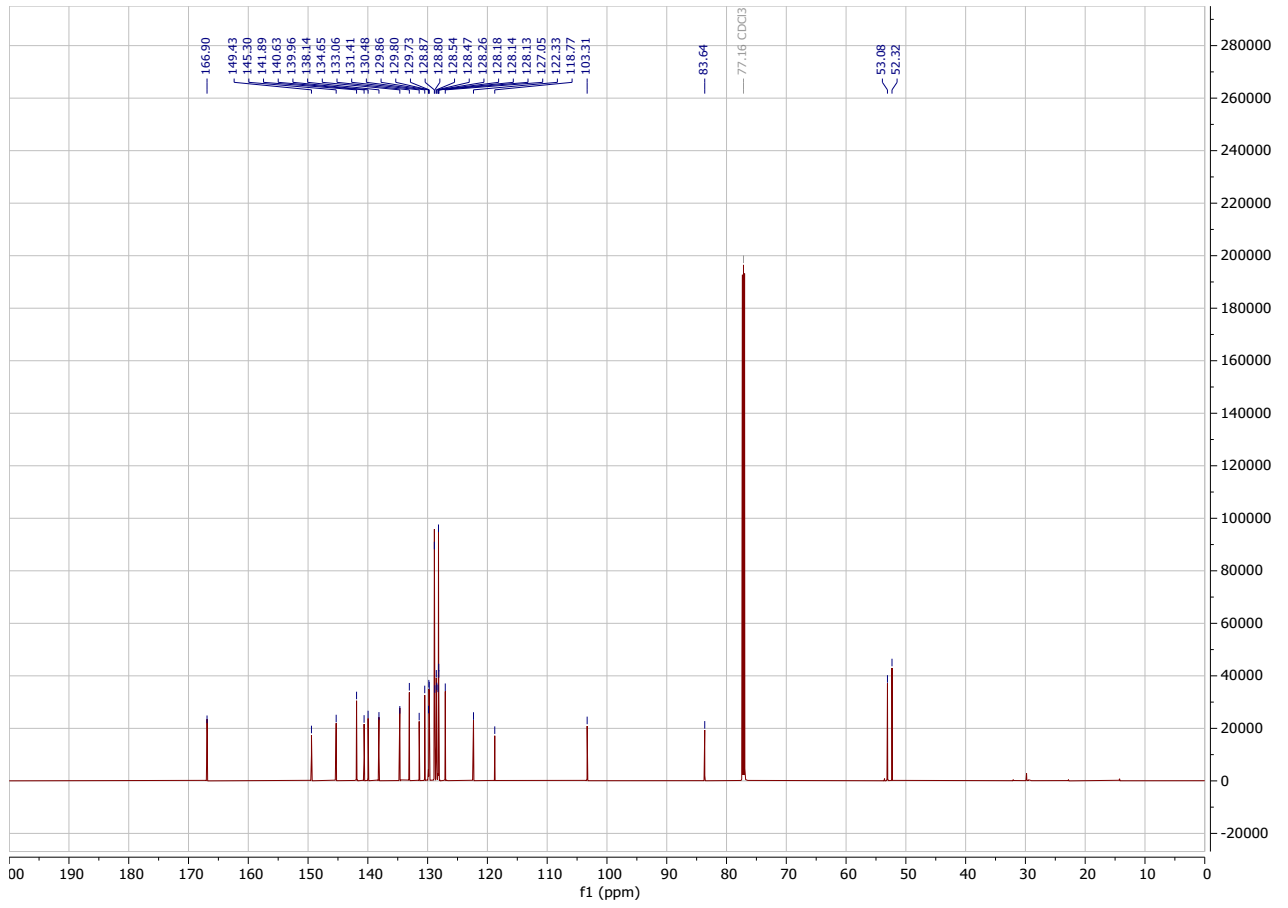

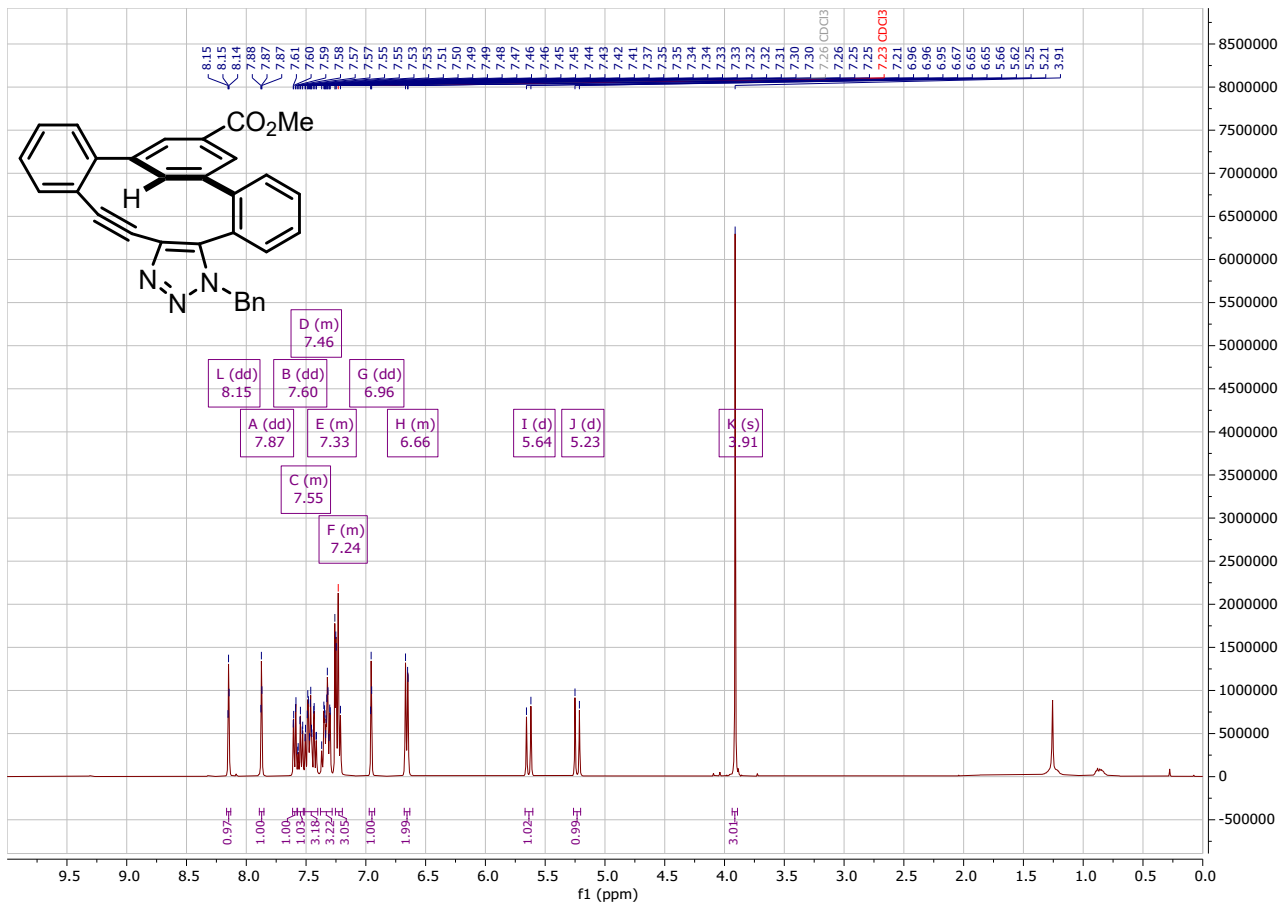

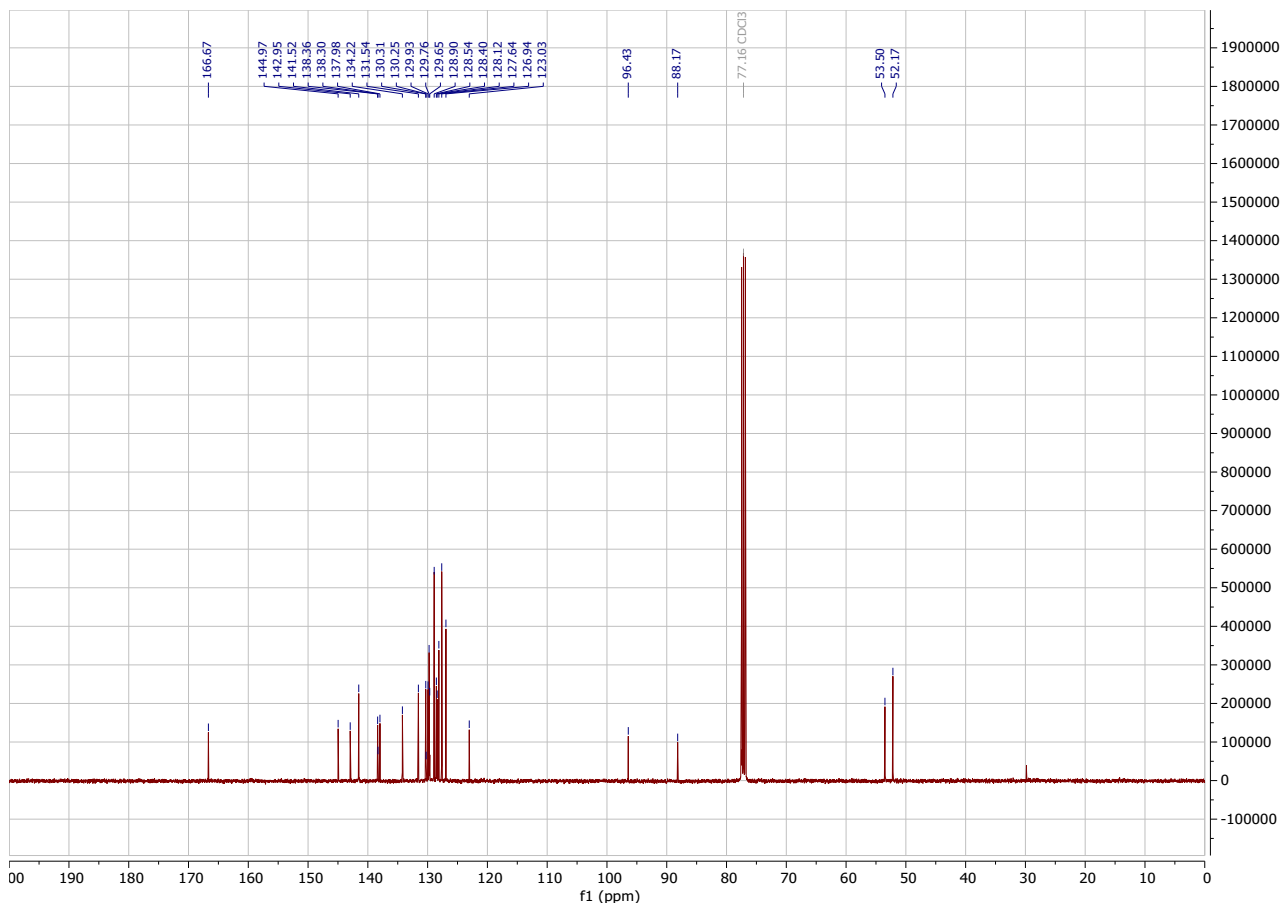

## COMPUTATIONAL STRUCTURES

The reaction energy profiles of each SPAAC reaction were examined using density functional theory (DFT) calculations using Gaussian16c.01.<sup>2</sup> All geometries were optimized using B3LYP functional with Grimme's dispersion correction (D3BJ) with the Popel triple zeta basis set (6-311+G(d,p)) in a continuum solvation model (SMD) with a dielectric constant for dichloromethane. Frequency calculations were performed in conjunction with all optimizations to confirm each structure as either a minimum (zero imaginary frequencies) or transition state structure (one imaginary frequency). Single point calculations were performed on the optimized and transition state structures using SMD(DCM)HF/STO-3G for a more accurate energy and molecular orbital depiction. NBO orbitals were calculated using single points from SMD(DCM)HF/STO-3G.<sup>3</sup> VESTA was used to visualize

<sup>2</sup> Gaussian 16, Revision B.01, Frisch, M. J.; Trucks, G. W.; Schlegel, H. B.; Scuseria, G. E.; Robb, M. A.; Cheeseman, J. R.; Scalmani, G.; Barone, V.; Petersson, G. A.; Nakatsuji, H.; Li, X.; Caricato, M.; Marenich, A. V.; Bloino, J.; Janesko, B. G.; Gomperts, R.; Mennucci, B.; Hratchian, H. P.; Ortiz, J. V.; Izmaylov, A. F.; Sonnenberg, J. L.; Williams-Young, D.; Ding, F.; Lipparini, F.; Egidi, F.; Goings, J.; Peng, B.; Petrone, A.; Henderson, T.; Ranasinghe, D.; Zakrzewski, V. G.; Gao, J.; Rega, N.; Zheng, G.; Liang, W.; Hada, M.; Ehara, M.; Toyota, K.; Fukuda, R.; Hasegawa, J.; Ishida, M.; Nakajima, T.; Honda, Y.; Kitao, O.; Nakai, H.; Vreven, T.; Throssell, K.; Montgomery, Jr., J. A.; Peralta, J. E.; Ogliaro, F.; Bearpark, M. J.; Heyd, J. J.; Brothers, E. N.; Kudin, K. N.; Staroverov, V. N.; Keith, T. A.; Kobayashi, R.; Normand, J.; Raghavachari, K.; Rendell, A. P.; Rendell, J. C.; Iyengar, S. S.; Tomasi, J.; Cossi, M.; Millam, J. M.; Klene, M.; Adamo, C.; Cammi, R.; Ochterski, J. W.; Martin, R. L.; Morokuma K.; Farkas, O.; Foresman, J. B.; Fox, D. J.; Gaussian, Inc., Wallingford CT, 2016.

<sup>3</sup> NBO Version 3.1, E. D. Glendening, A. E. Reed, J. E. Carpenter, and F. Weinhold



all molecular orbitals (isovalue = 0.3).<sup>4</sup> NCI plots were calculated using NCIPLOT.<sup>5</sup> NBO orbitals and NCI plots were visualized using VMD.

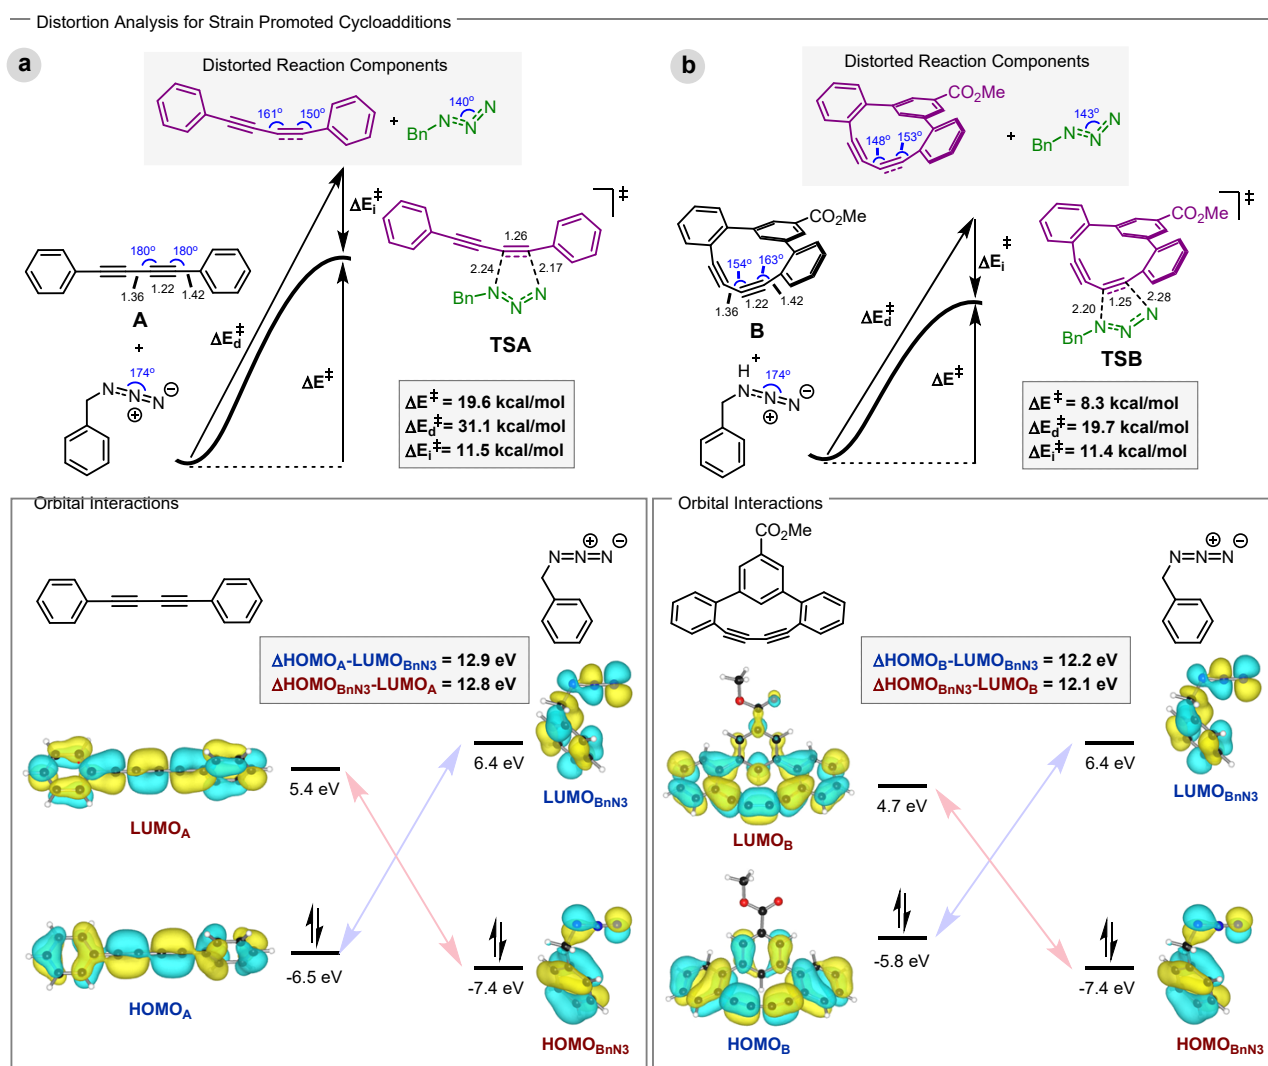

Figure S17: *top*: Distortion/interaction analysis for the cycloadditions between benzyl azide, a: A (1,4-diphenylbutadiyne) and b: B (3,5-TPDY 5). *bottom*: Orbital interaction diagrams for the respective cycloadditions (isovalue = 0.3). All bond lengths are reported in Angstroms.

**Table S1. Experimental and computational parameters for cycloadditions.**

<sup>4</sup> Momma, K.; Izumi, F. *J. Appl. Crystallogr.* **2011**, *44*, 1272

<sup>5</sup> VMD: Humphrey, W.; Dalke, A.; Schulten, K. *J. Molec. Graphics* **1996**, *14*, 33

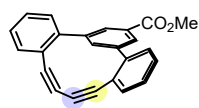

| Entry | diyne | Reagent                           | $k_{obs}$<br>( $M^{-1}s^{-1}$ ) | $\Delta HOMO_x$ -<br>$LUMO_{diyne}$<br>(eV) | $\Delta HOMO_{diyne}$<br>- $LUMO_x$<br>(eV) | $\Delta G^\ddagger$<br>(kcal·<br>mol $^{-1}$ ) | $\Delta E_{TS}^\ddagger$<br>(kcal·<br>mol $^{-1}$ ) | $\Delta E_{TS}^\ddagger$<br>(kcal·<br>mol $^{-1}$ ) | ( $\angle$ ●) | ( $\angle$ ●) |
|-------|-------|-----------------------------------|---------------------------------|---------------------------------------------|---------------------------------------------|------------------------------------------------|-----------------------------------------------------|-----------------------------------------------------|---------------|---------------|
| 1     | A     | BnN <sub>3</sub>                  | --                              | 12.8                                        | 12.9                                        | 30.2                                           | 19.6                                                | 31.1                                                |               |               |
| 2     | B     | BnN <sub>3</sub>                  | $1.7 \cdot 10^{-2}$             | 12.1                                        | 12.2                                        | 22.3                                           | 8.3                                                 | 19.7                                                | 10            | 6             |
| 3     | B     | N <sub>2</sub> CO <sub>2</sub> Et | $1.2 \cdot 10^{-2}$             | 11.6                                        | 12.0                                        | 22.5                                           | 9.7                                                 | 22.1                                                | 8             | 9             |
| 4     | B     | <b>8</b>                          | $1.7 \cdot 10^{-4}$             | 12.1                                        | 9.5                                         | 23.7                                           | 11.9                                                | 29.5                                                | 9             | 16            |

NBO Analysis

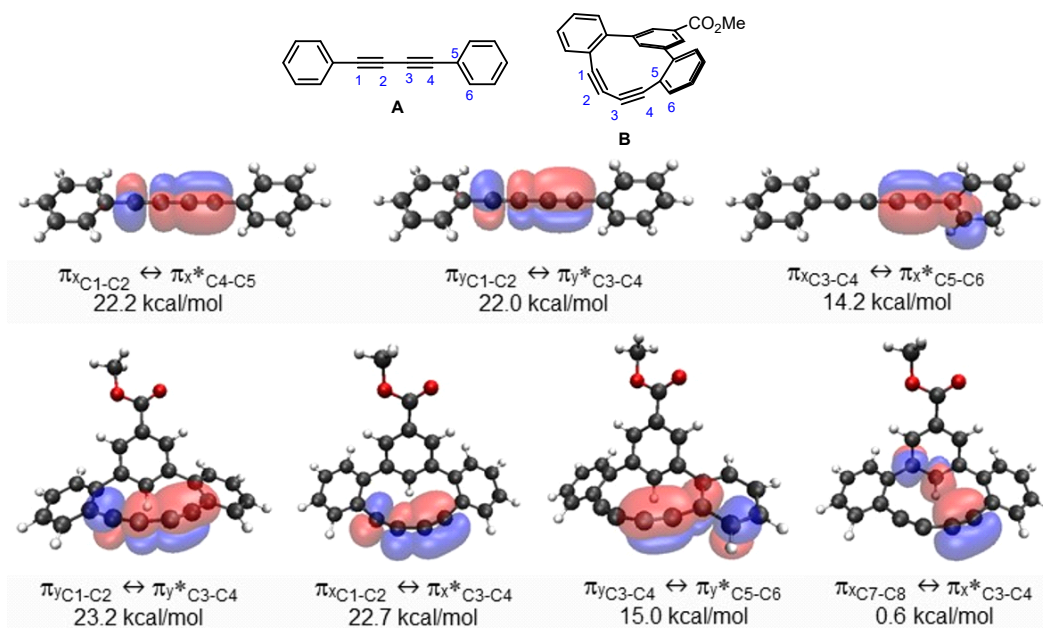

Figure S18: NBO analysis of orbital interactions in 1,4-diphenyl-1,3-butadiyne (A) and 3,5-TPDY 5 (B) (isovalue = 0.3).

### Ball and Stick Models of Transition States.

The lowest energy transition state for 3,5-TPDY and N<sub>2</sub>CO<sub>2</sub>Et was chosen for modeling of the reaction. Experimentally, a mixture of regioisomers was observed, and the pseudo-endo R transition state structure (TSC) was computationally determined to be equal in energy to the pseudo-endo S transition state structure (TSC<sub>EndoS</sub>). Experimentally, the enantiomers of both regioisomers were not identified, but due to the computationally determined small energy barrier difference it is likely that both are present with a slight preference for the lower barrier enantiomer.

Table S2. Transition States for enantiomers of both regio-isomers of 3,5-TPDY and N<sub>2</sub>CO<sub>2</sub>Et.

| TSC | TSC <sub>EndoS</sub> |
|-----|----------------------|
|-----|----------------------|

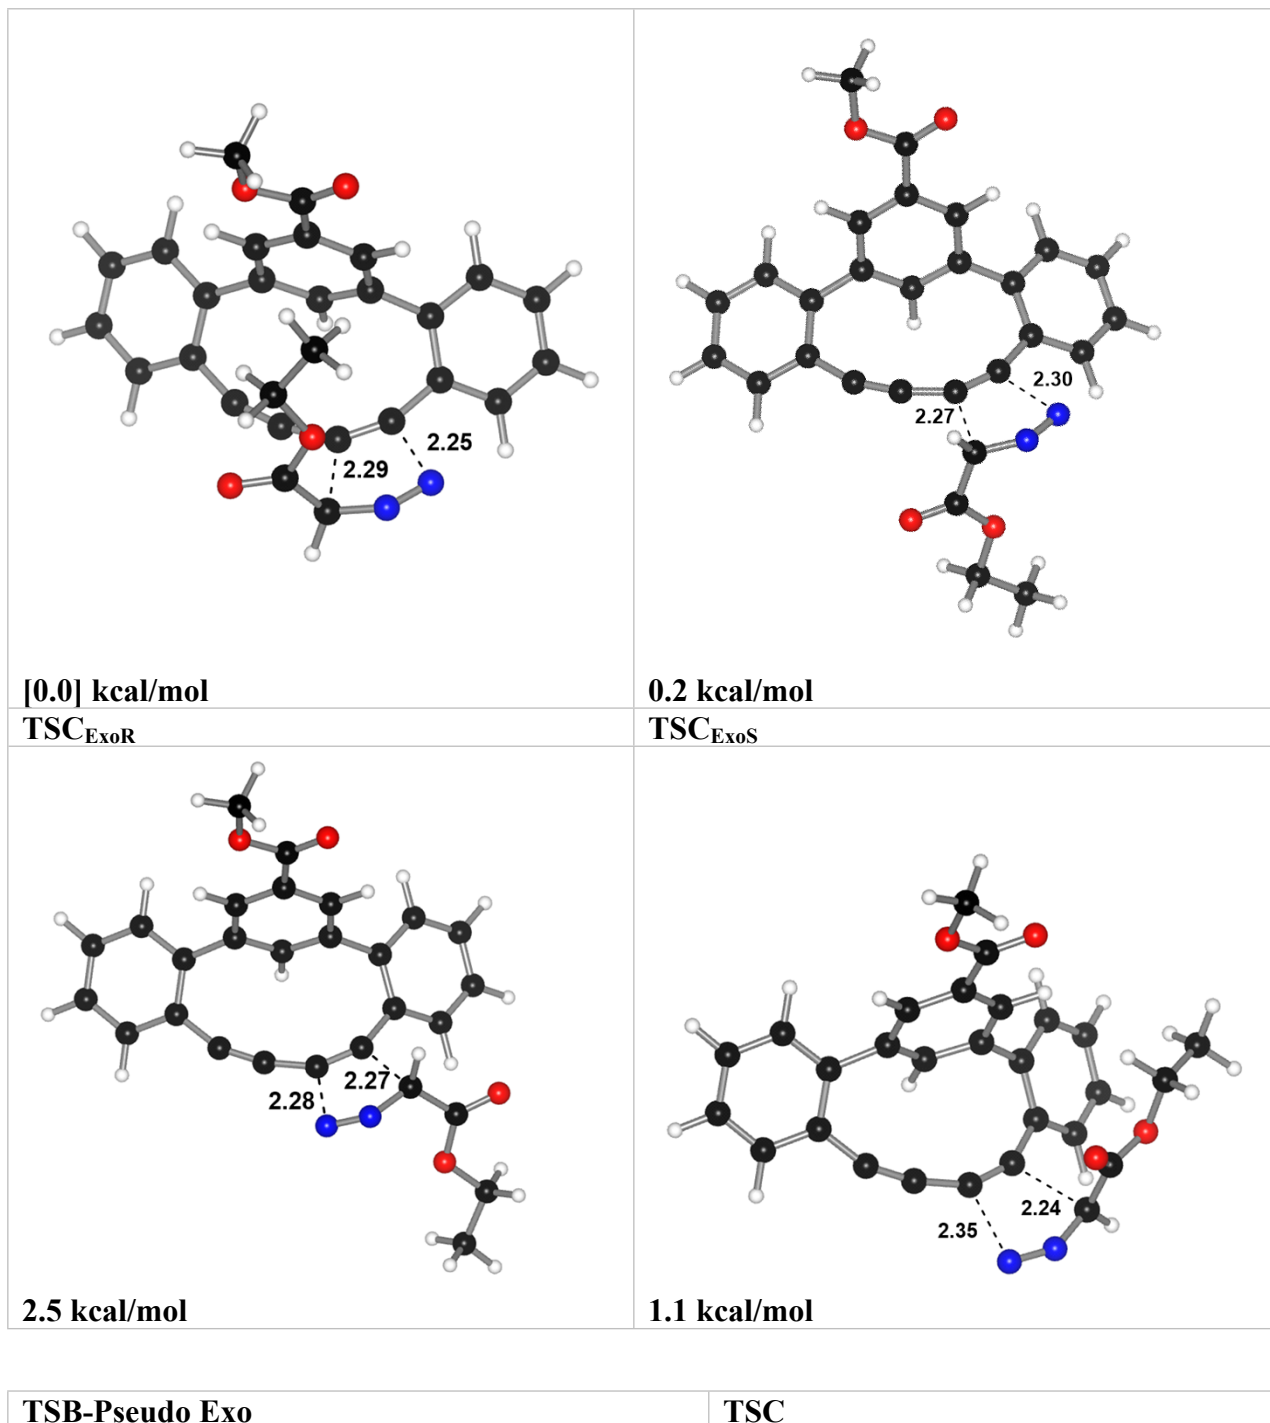

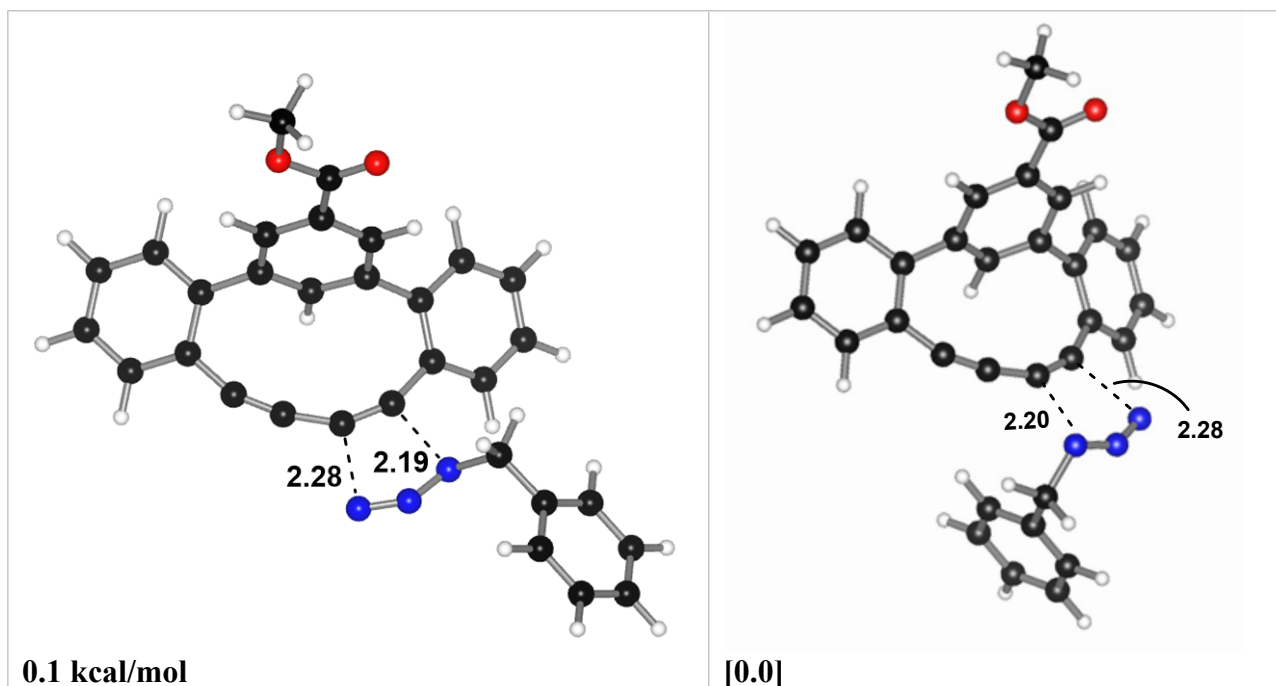

Table S3. Transition States of both regio-isomers of 3,5-TPDY and  $BnN_3$

As both regioisomers are equal The pseudo-endo conformer (**TSB**) was chosen as a model for the reaction as it was shown to be experimentally preferred.

## TSD

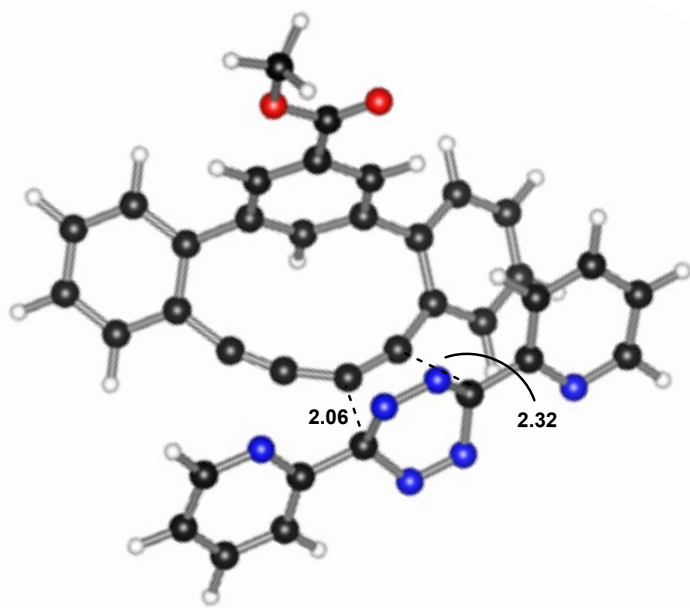

23.7 kcal/mol

Table S4. Transition state of tetrazine with 3,5-TPDY, energy is relative to starting material

## NCI Plot

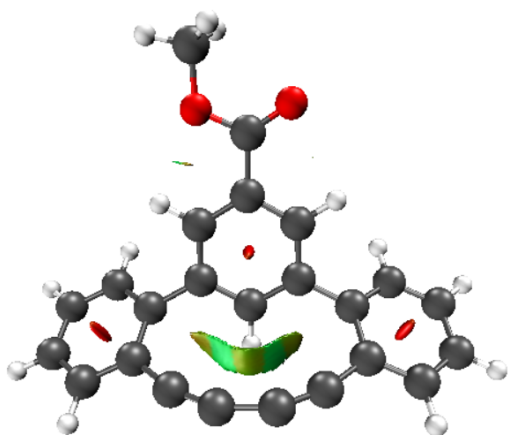

Figure S19. NCI plot of B.

## Molecular Orbitals of Other Systems

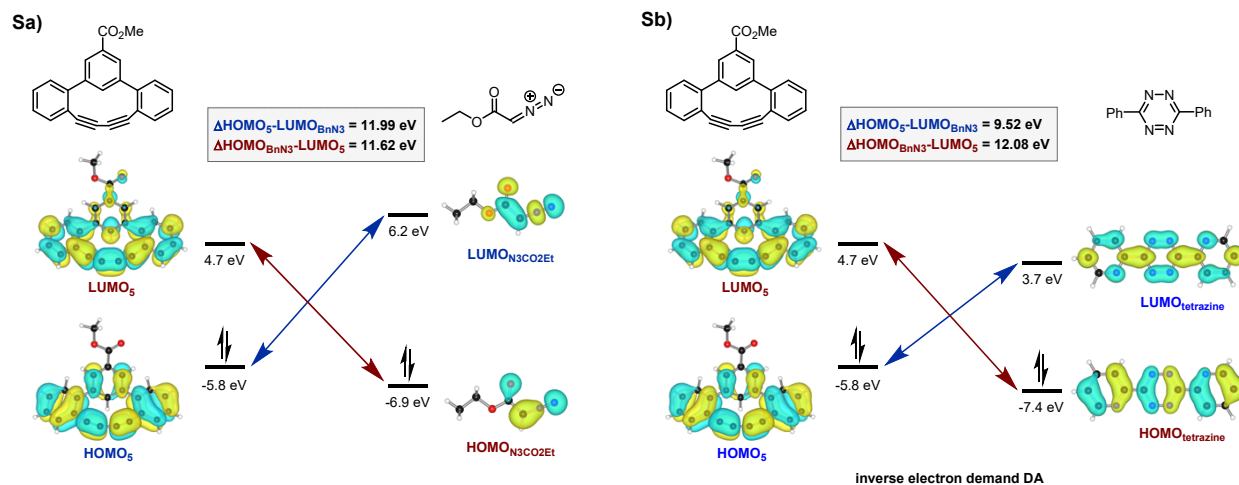

FIGURE S20. ORBITAL INTERACTION DIAGRAMS FOR THE RESPECTIVE CYCLOADDITIONS (ISOVALUE = 0.3)

## NBO Orbitals

### 1,4-diphenyl-1,3-butadiyne (A)

NATURAL POPULATIONS: Natural atomic orbital occupancies

NAO Atom No lang Type(AO) Occupancy Energy

---

|    |   |   |    |          |         |           |
|----|---|---|----|----------|---------|-----------|
| 1  | C | 1 | S  | Cor( 1S) | 1.99995 | -10.96225 |
| 2  | C | 1 | S  | Val( 2S) | 1.08053 | -0.19337  |
| 3  | C | 1 | px | Val( 2p) | 0.97593 | 0.14653   |
| 4  | C | 1 | py | Val( 2p) | 0.99372 | 0.06901   |
| 5  | C | 1 | pz | Val( 2p) | 0.99377 | 0.06850   |
| 6  | C | 2 | S  | Cor( 1S) | 1.99994 | -10.96985 |
| 7  | C | 2 | S  | Val( 2S) | 1.08423 | -0.19988  |
| 8  | C | 2 | px | Val( 2p) | 0.97549 | 0.14283   |
| 9  | C | 2 | py | Val( 2p) | 0.97862 | 0.06866   |
| 10 | C | 2 | pz | Val( 2p) | 0.97865 | 0.06815   |
| 11 | C | 3 | S  | Cor( 1S) | 1.99990 | -10.99407 |
| 12 | C | 3 | S  | Val( 2S) | 1.06054 | -0.19180  |
| 13 | C | 3 | px | Val( 2p) | 0.93617 | 0.15325   |
| 14 | C | 3 | py | Val( 2p) | 1.01260 | 0.05963   |
| 15 | C | 3 | pz | Val( 2p) | 1.01279 | 0.05912   |
| 16 | C | 4 | S  | Cor( 1S) | 1.99994 | -10.96985 |
| 17 | C | 4 | S  | Val( 2S) | 1.08423 | -0.19988  |
| 18 | C | 4 | px | Val( 2p) | 0.97550 | 0.14283   |
| 19 | C | 4 | py | Val( 2p) | 0.97863 | 0.06865   |
| 20 | C | 4 | pz | Val( 2p) | 0.97865 | 0.06816   |

21 C 5 S Cor( 1S) 1.99995 -10.96225  
22 C 5 S Val( 2S) 1.08053 -0.19337  
23 C 5 px Val( 2p) 0.97593 0.14653  
24 C 5 py Val( 2p) 0.99372 0.06900  
25 C 5 pz Val( 2p) 0.99377 0.06851  
26 C 6 S Cor( 1S) 1.99995 -10.96565  
27 C 6 S Val( 2S) 1.08323 -0.19611  
28 C 6 px Val( 2p) 0.99001 0.13856  
29 C 6 py Val( 2p) 0.97553 0.07462  
30 C 6 pz Val( 2p) 0.97555 0.07412  
31 H 7 S Val( 1S) 0.95341 0.07095  
32 H 8 S Val( 1S) 0.95104 0.06876  
33 H 9 S Val( 1S) 0.95104 0.06876  
34 H 10 S Val( 1S) 0.95341 0.07095  
35 H 11 S Val( 1S) 0.95365 0.06934  
36 C 12 S Cor( 1S) 1.99943 -10.92543  
37 C 12 S Val( 2S) 1.07461 -0.19514  
38 C 12 px Val( 2p) 0.96376 0.28678  
39 C 12 py Val( 2p) 0.97689 0.03292  
40 C 12 pz Val( 2p) 0.97692 0.03290  
41 C 13 S Cor( 1S) 1.99946 -10.92294  
42 C 13 S Val( 2S) 1.03741 -0.17034  
43 C 13 px Val( 2p) 0.97283 0.29025  
44 C 13 py Val( 2p) 1.03410 0.02128  
45 C 13 pz Val( 2p) 1.03408 0.02128  
46 C 14 S Cor( 1S) 1.99946 -10.92294  
47 C 14 S Val( 2S) 1.03742 -0.17034  
48 C 14 px Val( 2p) 0.97283 0.29025  
49 C 14 py Val( 2p) 1.03409 0.02128  
50 C 14 pz Val( 2p) 1.03409 0.02128  
51 C 15 S Cor( 1S) 1.99943 -10.92544  
52 C 15 S Val( 2S) 1.07463 -0.19515  
53 C 15 px Val( 2p) 0.96375 0.28678  
54 C 15 py Val( 2p) 0.97690 0.03291  
55 C 15 pz Val( 2p) 0.97691 0.03291  
56 C 16 S Cor( 1S) 1.99990 -10.99408  
57 C 16 S Val( 2S) 1.06055 -0.19182  
58 C 16 px Val( 2p) 0.93615 0.15325  
59 C 16 py Val( 2p) 1.01266 0.05947  
60 C 16 pz Val( 2p) 1.01273 0.05928  
61 C 17 S Cor( 1S) 1.99994 -10.96985  
62 C 17 S Val( 2S) 1.08424 -0.19988  
63 C 17 px Val( 2p) 0.97549 0.14283  
64 C 17 py Val( 2p) 0.97863 0.06849  
65 C 17 pz Val( 2p) 0.97864 0.06831  
66 C 18 S Cor( 1S) 1.99994 -10.96985  
67 C 18 S Val( 2S) 1.08423 -0.19988

68 C 18 px Val( 2p) 0.97550 0.14283  
 69 C 18 py Val( 2p) 0.97863 0.06850  
 70 C 18 pz Val( 2p) 0.97864 0.06831  
 71 C 19 S Cor( 1S) 1.99995 -10.96225  
 72 C 19 S Val( 2S) 1.08053 -0.19337  
 73 C 19 px Val( 2p) 0.97593 0.14653  
 74 C 19 py Val( 2p) 0.99374 0.06884  
 75 C 19 pz Val( 2p) 0.99375 0.06866  
 76 H 20 S Val( 1S) 0.95104 0.06876  
 77 C 21 S Cor( 1S) 1.99995 -10.96225  
 78 C 21 S Val( 2S) 1.08053 -0.19337  
 79 C 21 px Val( 2p) 0.97593 0.14653  
 80 C 21 py Val( 2p) 0.99374 0.06884  
 81 C 21 pz Val( 2p) 0.99376 0.06866  
 82 H 22 S Val( 1S) 0.95104 0.06876  
 83 C 23 S Cor( 1S) 1.99995 -10.96565  
 84 C 23 S Val( 2S) 1.08323 -0.19611  
 85 C 23 px Val( 2p) 0.99001 0.13856  
 86 C 23 py Val( 2p) 0.97553 0.07447  
 87 C 23 pz Val( 2p) 0.97555 0.07427  
 88 H 24 S Val( 1S) 0.95341 0.07095  
 89 H 25 S Val( 1S) 0.95341 0.07095  
 90 H 26 S Val( 1S) 0.95365 0.06934

Natural Bond Orbitals (Summary):

Principal Delocalizations

NBO Occupancy Energy (geminal,vicinal,remote)

=====

Molecular unit 1 (C16H10)

1. BD ( 1) C 1 - C 2 1.98883 -0.79394 68(v),62(v),66(v),61(v),60(g),57(g)
2. BD ( 1) C 1 - C 6 1.98918 -0.78832 67(v),60(v),58(v),63(v),68(g),57(g)
3. BD ( 2) C 1 - C 6 1.65082 -0.25066 59(v),64(v)
4. BD ( 1) C 1 - H 7 1.98902 -0.65747 58(v),66(v),60(v),68(v),55(g),54(g)
5. BD ( 1) C 2 - C 3 1.98028 -0.78563 70(v),57(v),65(v),55(v),63(v),60(g),62(g)
6. BD ( 2) C 2 - C 3 1.64421 -0.25181 64(v),56(v),71(v)
7. BD ( 1) C 2 - H 8 1.98924 -0.66221 55(v),61(v),62(v),58(g),57(v),54(g)
8. BD ( 1) C 3 - C 4 1.98028 -0.78562 70(v),67(v),60(v),66(v),54(v),65(g),62(g)
9. BD ( 1) C 3 - C 12 1.99020 -0.81353 54(v),63(v),69(g),61(g),58(g),72(v),60(v),65(v)
10. BD ( 1) C 4 - C 5 1.98883 -0.79395 68(v),62(v),55(v),58(v),65(g),67(g)
11. BD ( 2) C 4 - C 5 1.66846 -0.25669 56(v),59(v)
12. BD ( 1) C 4 - H 9 1.98924 -0.66221 66(v),58(v),62(v),61(g),67(v),63(g)
13. BD ( 1) C 5 - C 6 1.98918 -0.78831 57(v),65(v),61(v),54(v),68(g),67(g)
14. BD ( 1) C 5 - H 10 1.98902 -0.65747 61(v),55(v),65(v),68(v),66(g),63(g)
15. BD ( 1) C 6 - H 11 1.98939 -0.65931 54(v),63(v),57(v),67(v),55(g),66(g)
16. BD ( 1) C 12 - C 13 1.99743 -0.99143 62(g)



17. BD ( 2) C 12 - C 13 1.93866 -0.33778 75(v),58(v),61(v)
18. BD ( 3) C 12 - C 13 1.91479 -0.33391 74(v),59(v)
19. BD ( 1) C 13 - C 14 1.99786 -0.88789 62(v),76(v)
20. BD ( 1) C 14 - C 15 1.99743 -0.99143 76(g)
21. BD ( 2) C 14 - C 15 1.93866 -0.33778 71(v),77(v),78(v)
22. BD ( 3) C 14 - C 15 1.91480 -0.33392 70(v),79(v)
23. BD ( 1) C 15 - C 16 1.99020 -0.81350 80(v),83(v),73(g),78(g),77(g),72(v),82(v),84(v)
24. BD ( 1) C 16 - C 17 1.98028 -0.78562 74(v),86(v),84(v),85(v),83(v),82(g),76(g)
25. BD ( 1) C 16 - C 18 1.98028 -0.78563 74(v),89(v),82(v),87(v),80(v),84(g),76(g)
26. BD ( 2) C 16 - C 18 1.64422 -0.25182 81(v),88(v),75(v)
27. BD ( 1) C 17 - C 19 1.98883 -0.79394 90(v),76(v),87(v),78(v),82(g),86(g)
28. BD ( 2) C 17 - C 19 1.66846 -0.25668 88(v),79(v)
29. BD ( 1) C 17 - H 20 1.98924 -0.66221 85(v),78(v),76(v),77(g),86(v),80(g)
30. BD ( 1) C 18 - C 21 1.98883 -0.79395 90(v),76(v),85(v),77(v),84(g),89(g)
31. BD ( 1) C 18 - H 22 1.98924 -0.66221 87(v),77(v),76(v),78(g),89(v),83(g)
32. BD ( 1) C 19 - C 23 1.98918 -0.78831 89(v),82(v),77(v),83(v),90(g),86(g)
33. BD ( 1) C 19 - H 24 1.98902 -0.65747 77(v),87(v),82(v),90(v),85(g),80(g)
34. BD ( 1) C 21 - C 23 1.98918 -0.78832 86(v),84(v),78(v),80(v),90(g),89(g)
35. BD ( 2) C 21 - C 23 1.65082 -0.25066 79(v),81(v)
36. BD ( 1) C 21 - H 25 1.98902 -0.65747 78(v),85(v),84(v),90(v),87(g),83(g)
37. BD ( 1) C 23 - H 26 1.98939 -0.65931 83(v),80(v),86(v),89(v),85(g),87(g)
38. CR ( 1) C 1 1.99995 -10.96222
39. CR ( 1) C 2 1.99994 -10.96976
40. CR ( 1) C 3 1.99990 -10.99413
41. CR ( 1) C 4 1.99994 -10.96976
42. CR ( 1) C 5 1.99995 -10.96223
43. CR ( 1) C 6 1.99995 -10.96563
44. CR ( 1) C 12 1.99943 -10.92550 72(v),62(g),69(g)
45. CR ( 1) C 13 1.99946 -10.92314 62(v),72(g),73(v),69(g)
46. CR ( 1) C 14 1.99946 -10.92314 76(v),72(g),69(v),73(g)
47. CR ( 1) C 15 1.99943 -10.92551 72(v),76(g),73(g)
48. CR ( 1) C 16 1.99990 -10.99413
49. CR ( 1) C 17 1.99994 -10.96976
50. CR ( 1) C 18 1.99994 -10.96976
51. CR ( 1) C 19 1.99995 -10.96223
52. CR ( 1) C 21 1.99995 -10.96222
53. CR ( 1) C 23 1.99995 -10.96563
54. BD\*( 1) C 1 - C 2 0.01039 0.87924
55. BD\*( 1) C 1 - C 6 0.01097 0.87285
56. BD\*( 2) C 1 - C 6 0.32947 0.24728 64(v),59(v)
57. BD\*( 1) C 1 - H 7 0.01011 0.73607
58. BD\*( 1) C 2 - C 3 0.01677 0.85131
59. BD\*( 2) C 2 - C 3 0.37802 0.23253 56(v),64(v),71(v)
60. BD\*( 1) C 2 - H 8 0.00999 0.73284
61. BD\*( 1) C 3 - C 4 0.01677 0.85129
62. BD\*( 1) C 3 - C 12 0.01245 0.82695
63. BD\*( 1) C 4 - C 5 0.01039 0.87925

64. BD\*( 2) C 4 - C 5 0.31489 0.24955 56(v),59(v)
65. BD\*( 1) C 4 - H 9 0.00999 0.73284
66. BD\*( 1) C 5 - C 6 0.01097 0.87284
67. BD\*( 1) C 5 - H 10 0.01011 0.73607
68. BD\*( 1) C 6 - H 11 0.01008 0.73442
69. BD\*( 1) C 12 - C 13 0.00395 1.21535
70. BD\*( 2) C 12 - C 13 0.06878 0.39362
71. BD\*( 3) C 12 - C 13 0.09976 0.38645
72. BD\*( 1) C 13 - C 14 0.00334 0.92893
73. BD\*( 1) C 14 - C 15 0.00395 1.21536
74. BD\*( 2) C 14 - C 15 0.06877 0.39362
75. BD\*( 3) C 14 - C 15 0.09975 0.38646
76. BD\*( 1) C 15 - C 16 0.01245 0.82689
77. BD\*( 1) C 16 - C 17 0.01677 0.85128
78. BD\*( 1) C 16 - C 18 0.01677 0.85130
79. BD\*( 2) C 16 - C 18 0.37802 0.23253 88(v),81(v),75(v)
80. BD\*( 1) C 17 - C 19 0.01039 0.87924
81. BD\*( 2) C 17 - C 19 0.31490 0.24955 88(v),79(v)
82. BD\*( 1) C 17 - H 20 0.00999 0.73284
83. BD\*( 1) C 18 - C 21 0.01039 0.87924
84. BD\*( 1) C 18 - H 22 0.00999 0.73284
85. BD\*( 1) C 19 - C 23 0.01097 0.87284
86. BD\*( 1) C 19 - H 24 0.01011 0.73607
87. BD\*( 1) C 21 - C 23 0.01097 0.87285
88. BD\*( 2) C 21 - C 23 0.32948 0.24728 81(v),79(v)
89. BD\*( 1) C 21 - H 25 0.01011 0.73607
90. BD\*( 1) C 23 - H 26 0.01008 0.73442

-----  
 Total Lewis 103.32902 ( 97.4802%)  
 Valence non-Lewis 2.67098 ( 2.5198%)  
 Rydberg non-Lewis 0.00000 ( 0.0000%)  
 -----

Total unit 1 106.00000 (100.0000%)  
 Charge unit 1 0.00000  
 Sorting of NBOs: 48 40 49 50 41 39 53 43 51 42  
 Sorting of NBOs: 52 38 47 44 46 45 20 16 19 9  
 Sorting of NBOs: 23 10 30 27 1 2 34 13 32 25  
 Sorting of NBOs: 5 8 24 12 7 31 29 37 15 33  
 Sorting of NBOs: 14 4 36 21 17 22 18 11 28 26  
 Sorting of NBOs: 6 35 3 79 59 88 56 81 64 71  
 Sorting of NBOs: 75 70 74 60 84 82 65 68 90 89  
 Sorting of NBOs: 67 57 86 76 62 77 61 78 58 85  
 Sorting of NBOs: 66 55 87 80 54 83 63 72 69 73  
 Reordering of NBOs for storage: 48 40 49 50 41 39 53 43 51 42  
 Reordering of NBOs for storage: 52 38 47 44 46 45 20 16 19 9  
 Reordering of NBOs for storage: 23 10 30 27 1 2 34 13 32 25  
 Reordering of NBOs for storage: 5 8 24 12 7 31 29 37 15 33

Reordering of NBOs for storage: 14 4 36 21 17 22 18 11 28 26  
 Reordering of NBOs for storage: 6 35 3 79 59 88 56 81 64 71  
 Reordering of NBOs for storage: 75 70 74 60 84 82 65 68 90 89  
 Reordering of NBOs for storage: 67 57 86 76 62 77 61 78 58 85  
 Reordering of NBOs for storage: 66 55 87 80 54 83 63 72 69 73

### **3,5-TPDY 5 (B)**

Natural Bond Orbitals (Summary):

| NBO                         | Principal Delocalizations |                                                                                              |
|-----------------------------|---------------------------|----------------------------------------------------------------------------------------------|
|                             | Occupancy                 | Energy (geminal,vicinal,remote)                                                              |
| =====                       |                           |                                                                                              |
| Molecular unit 1 (C24H14O2) |                           |                                                                                              |
| 1. BD ( 1) C 1 - C 2        | 1.98386                   | -0.78853 96(v),102(v),105(v),93(g)<br>94(v),99(v),91(g),104(v)<br>90(g)                      |
| 2. BD ( 2) C 1 - C 2        | 1.63731                   | -0.24533 95(v),100(v),105(v),103(v)<br>104(v)                                                |
| 3. BD ( 1) C 1 - C 6        | 1.98373                   | -0.78810 101(v),93(v),119(v),102(g)<br>97(v),92(v),91(g),118(v)<br>88(g)                     |
| 4. BD ( 1) C 1 - H 7        | 1.98851                   | -0.65921 92(v),99(v),93(v),102(v)<br>90(g),88(g)                                             |
| 5. BD ( 1) C 2 - C 3        | 1.98245                   | -0.78865 98(v),91(v),105(v),90(v)<br>97(v),93(g),96(g),103(v)                                |
| 6. BD ( 1) C 2 - C 10       | 1.97871                   | -0.72297 109(v),94(v),90(v),106(v)<br>103(g),88(g),92(g),110(v)<br>104(g),108(v),96(v),91(v) |
| 7. BD ( 1) C 3 - C 4        | 1.98565                   | -0.79397 101(v),93(v),138(v),98(g)<br>140(v),99(v),88(v),96(g)                               |
| 8. BD ( 2) C 3 - C 4        | 1.65310                   | -0.25469 100(v),89(v),139(v)                                                                 |
| 9. BD ( 1) C 3 - H 8        | 1.98805                   | -0.66123 97(v),88(v),98(v),93(v)<br>92(g),94(g)                                              |
| 10. BD ( 1) C 4 - C 5       | 1.98459                   | -0.79188 96(v),102(v),140(v),138(v)<br>92(v),98(g),90(v),101(g)                              |
| 11. BD ( 1) C 4 - C 34      | 1.97836                   | -0.76283 141(v),140(g),99(v),138(g)<br>92(v),94(g),97(g),101(v)<br>96(v)                     |
| 12. BD ( 1) C 5 - C 6       | 1.98279                   | -0.78988 91(v),98(v),119(v),88(v)<br>94(v),102(g),101(g),117(v)                              |
| 13. BD ( 2) C 5 - C 6       | 1.64593                   | -0.24958 89(v),95(v),119(v),117(v)<br>118(v)                                                 |
| 14. BD ( 1) C 5 - H 9       | 1.98813                   | -0.66120 94(v),90(v),98(v),102(v)<br>99(g),97(g)                                             |
| 15. BD ( 1) C 6 - C 20      | 1.97874                   | -0.72305 123(v),97(v),88(v),120(v)                                                           |

117(g),90(g),99(g),124(v)  
 101(v),122(v),118(g),91(v)  
 16. BD ( 1) C 10 - C 11 1.97157 -0.77439 136(v),110(v),112(v),89(v)  
 93(g),109(v),111(v),104(g)  
 106(g)  
 17. BD ( 1) C 10 - C 12 1.98317 -0.78980 115(v),108(v),89(v),113(v)  
 93(g),106(v),88(v),110(g)  
 103(g)  
 18. BD ( 2) C 10 - C 12 1.65599 -0.25154 114(v),107(v),89(v),88(v)  
 92(v)  
 19. BD ( 1) C 11 - C 13 1.98287 -0.79009 136(v),116(v),93(v),113(v)  
 104(v),112(g),108(g),103(g)  
 20. BD ( 2) C 11 - C 13 1.65440 -0.25531 114(v),105(v),137(v)  
 21. BD ( 1) C 11 - C 32 1.98914 -0.81047 111(v),104(v),135(g),103(g)  
 93(v),112(v)  
 22. BD ( 1) C 12 - C 14 1.98914 -0.79056 116(v),93(v),111(v),103(v)  
 115(g),110(g)  
 23. BD ( 1) C 12 - H 15 1.98830 -0.65677 113(v),103(v),93(v),115(v)  
 104(g),109(g)  
 24. BD ( 1) C 13 - C 16 1.98918 -0.79477 115(v),108(v),109(v),103(v)  
 116(g),112(g)  
 25. BD ( 1) C 13 - H 17 1.98878 -0.66178 103(v),113(v),108(v),116(v)  
 106(g),111(g)  
 26. BD ( 1) C 14 - C 16 1.98918 -0.78938 112(v),110(v),106(v),104(v)  
 115(g),116(g)  
 27. BD ( 2) C 14 - C 16 1.65162 -0.25132 107(v),105(v)  
 28. BD ( 1) C 14 - H 18 1.98915 -0.65923 104(v),111(v),110(v),116(v)  
 113(g),109(g)  
 29. BD ( 1) C 16 - H 19 1.98916 -0.65829 106(v),109(v),112(v),115(v)  
 113(g),111(g)  
 30. BD ( 1) C 20 - C 21 1.97156 -0.77431 132(v),124(v),126(v),100(v)  
 102(g),123(v),125(v),118(g)  
 120(g)  
 31. BD ( 1) C 20 - C 22 1.98318 -0.78968 129(v),122(v),100(v),127(v)  
 102(g),120(v),90(v),124(g)  
 117(g)  
 32. BD ( 2) C 20 - C 22 1.65584 -0.25137 128(v),121(v),100(v),90(v)  
 99(v)  
 33. BD ( 1) C 21 - C 23 1.98286 -0.78996 132(v),130(v),102(v),127(v)  
 118(v),126(g),122(g),117(g)  
 34. BD ( 2) C 21 - C 23 1.65440 -0.25520 128(v),119(v),133(v)  
 35. BD ( 1) C 21 - C 30 1.98915 -0.81053 125(v),118(v),131(g),117(g)  
 102(v),126(v)  
 36. BD ( 1) C 22 - C 24 1.98914 -0.79040 130(v),102(v),125(v),117(v)  
 129(g),124(g)  
 37. BD ( 1) C 22 - H 25 1.98830 -0.65657 127(v),117(v),102(v),129(v)  
 118(g),123(g)

|                         |         |           |                                              |
|-------------------------|---------|-----------|----------------------------------------------|
| 38. BD ( 1) C 23 - C 26 | 1.98918 | -0.79465  | 129(v),122(v),123(v),117(v)<br>130(g),126(g) |
| 39. BD ( 1) C 23 - H 27 | 1.98878 | -0.66167  | 117(v),127(v),122(v),130(v)<br>120(g),125(g) |
| 40. BD ( 1) C 24 - C 26 | 1.98918 | -0.78922  | 126(v),124(v),120(v),118(v)<br>129(g),130(g) |
| 41. BD ( 2) C 24 - C 26 | 1.65150 | -0.25113  | 121(v),119(v)                                |
| 42. BD ( 1) C 24 - H 28 | 1.98915 | -0.65904  | 118(v),125(v),124(v),130(v)<br>127(g),123(g) |
| 43. BD ( 1) C 26 - H 29 | 1.98916 | -0.65814  | 120(v),123(v),126(v),129(v)<br>127(g),125(g) |
| 44. BD ( 1) C 30 - C 31 | 1.99651 | -0.96546  | 122(g)                                       |
| 45. BD ( 2) C 30 - C 31 | 1.93941 | -0.34876  | 136(v),120(v),117(v),134(g),89(r)            |
| 46. BD ( 3) C 30 - C 31 | 1.90505 | -0.33171  | 137(v),121(v)                                |
| 47. BD ( 1) C 31 - C 33 | 1.99629 | -0.87234  |                                              |
| 48. BD ( 1) C 32 - C 33 | 1.99652 | -0.96553  | 108(g)                                       |
| 49. BD ( 2) C 32 - C 33 | 1.93953 | -0.34878  | 132(v),106(v),103(v),134(g)                  |
| 50. BD ( 3) C 32 - C 33 | 1.90506 | -0.33173  | 133(v),107(v)                                |
| 51. BD ( 1) C 34 - O 35 | 1.99314 | -1.05945  | 140(g),98(g),94(v)                           |
| 52. BD ( 2) C 34 - O 35 | 1.98327 | -0.42790  | 95(v),139(g)                                 |
| 53. BD ( 1) C 34 - O 36 | 1.98405 | -0.94029  | 141(g),98(g),138(g),142(v),97(v)             |
| 54. BD ( 1) O 36 - C 37 | 1.98196 | -0.80241  | 138(v),98(v),140(g),144(g),143(g),142(g)     |
| 55. BD ( 1) C 37 - H 38 | 1.99626 | -0.66101  | 140(v),141(g)                                |
| 56. BD ( 1) C 37 - H 39 | 1.99708 | -0.66139  | 141(g)                                       |
| 57. BD ( 1) C 37 - H 40 | 1.99707 | -0.66146  | 141(g)                                       |
| 58. CR ( 1) C 1         | 1.99994 | -10.97029 |                                              |
| 59. CR ( 1) C 2         | 1.99990 | -10.98063 |                                              |
| 60. CR ( 1) C 3         | 1.99994 | -10.96745 |                                              |
| 61. CR ( 1) C 4         | 1.99990 | -10.97593 |                                              |
| 62. CR ( 1) C 5         | 1.99994 | -10.96669 |                                              |
| 63. CR ( 1) C 6         | 1.99990 | -10.98056 |                                              |
| 64. CR ( 1) C 10        | 1.99990 | -10.98953 |                                              |
| 65. CR ( 1) C 11        | 1.99989 | -10.99625 |                                              |
| 66. CR ( 1) C 12        | 1.99994 | -10.96111 |                                              |
| 67. CR ( 1) C 13        | 1.99994 | -10.96877 |                                              |
| 68. CR ( 1) C 14        | 1.99995 | -10.96498 |                                              |
| 69. CR ( 1) C 16        | 1.99994 | -10.96182 |                                              |
| 70. CR ( 1) C 20        | 1.99990 | -10.98939 |                                              |
| 71. CR ( 1) C 21        | 1.99989 | -10.99613 |                                              |
| 72. CR ( 1) C 22        | 1.99994 | -10.96094 |                                              |
| 73. CR ( 1) C 23        | 1.99994 | -10.96868 |                                              |
| 74. CR ( 1) C 24        | 1.99995 | -10.96483 |                                              |
| 75. CR ( 1) C 26        | 1.99994 | -10.96168 |                                              |
| 76. CR ( 1) C 30        | 1.99941 | -10.92295 | 134(v),122(g),132(g)                         |
| 77. CR ( 1) C 31        | 1.99935 | -10.92422 | 122(v),132(g),134(g),135(v)                  |
| 78. CR ( 1) C 32        | 1.99941 | -10.92283 | 134(v),108(g),136(g)                         |
| 79. CR ( 1) C 33        | 1.99935 | -10.92428 | 108(v),136(g),134(g),131(v)                  |

|                          |         |           |                                            |
|--------------------------|---------|-----------|--------------------------------------------|
| 80. CR ( 1) C 34         | 1.99991 | -11.11154 | 140(g)                                     |
| 81. CR ( 1) O 35         | 1.99999 | -20.08615 |                                            |
| 82. CR ( 1) O 36         | 1.99999 | -20.20865 |                                            |
| 83. CR ( 1) C 37         | 1.99982 | -11.03993 | 141(g)                                     |
| 84. LP ( 1) O 35         | 1.99814 | -0.94744  |                                            |
| 85. LP ( 2) O 35         | 1.89080 | -0.33197  | 140(v),98(v),141(r)                        |
| 86. LP ( 1) O 36         | 1.98319 | -0.80782  | 138(v),98(v),142(v),144(v),143(v),96(r)    |
| 87. LP ( 2) O 36         | 1.84520 | -0.36932  | 139(v),143(v),144(v)                       |
| 88. BD*( 1) C 1 - C 2    | 0.01569 | 0.86233   |                                            |
| 89. BD*( 2) C 1 - C 2    | 0.33698 | 0.24717   | 100(v),95(v),105(v),103(v), 128(r),104(v)  |
| 90. BD*( 1) C 1 - C 6    | 0.01576 | 0.86170   |                                            |
| 91. BD*( 1) C 1 - H 7    | 0.01165 | 0.73908   |                                            |
| 92. BD*( 1) C 2 - C 3    | 0.01494 | 0.86922   |                                            |
| 93. BD*( 1) C 2 - C 10   | 0.02237 | 0.74418   |                                            |
| 94. BD*( 1) C 3 - C 4    | 0.01398 | 0.87231   |                                            |
| 95. BD*( 2) C 3 - C 4    | 0.36089 | 0.24075   | 89(v),100(v),139(v)                        |
| 96. BD*( 1) C 3 - H 8    | 0.01249 | 0.73735   |                                            |
| 97. BD*( 1) C 4 - C 5    | 0.01334 | 0.87430   |                                            |
| 98. BD*( 1) C 4 - C 34   | 0.06541 | 0.70848   |                                            |
| 99. BD*( 1) C 5 - C 6    | 0.01465 | 0.87098   |                                            |
| 100. BD*( 2) C 5 - C 6   | 0.33585 | 0.24790   | 89(v),95(v),119(v),117(v), 118(v)          |
| 101. BD*( 1) C 5 - H 9   | 0.01293 | 0.73561   |                                            |
| 102. BD*( 1) C 6 - C 20  | 0.02239 | 0.74453   |                                            |
| 103. BD*( 1) C 10 - C 11 | 0.02356 | 0.82514   |                                            |
| 104. BD*( 1) C 10 - C 12 | 0.01455 | 0.87058   |                                            |
| 105. BD*( 2) C 10 - C 12 | 0.32610 | 0.24930   | 114(v),89(v),107(v),92(v),88(v),119(r)     |
| 106. BD*( 1) C 11 - C 13 | 0.01680 | 0.85666   |                                            |
| 107. BD*( 2) C 11 - C 13 | 0.37355 | 0.23395   | 114(v),105(v),137(v)                       |
| 108. BD*( 1) C 11 - C 32 | 0.01344 | 0.82522   |                                            |
| 109. BD*( 1) C 12 - C 14 | 0.01105 | 0.87597   |                                            |
| 110. BD*( 1) C 12 - H 15 | 0.01101 | 0.73654   |                                            |
| 111. BD*( 1) C 13 - C 16 | 0.01036 | 0.88087   |                                            |
| 112. BD*( 1) C 13 - H 17 | 0.00985 | 0.73310   |                                            |
| 113. BD*( 1) C 14 - C 16 | 0.01090 | 0.87528   |                                            |
| 114. BD*( 2) C 14 - C 16 | 0.33002 | 0.24766   | 105(v),107(v)                              |
| 115. BD*( 1) C 14 - H 18 | 0.01009 | 0.73466   |                                            |
| 116. BD*( 1) C 16 - H 19 | 0.01017 | 0.73621   |                                            |
| 117. BD*( 1) C 20 - C 21 | 0.02354 | 0.82534   |                                            |
| 118. BD*( 1) C 20 - C 22 | 0.01454 | 0.87086   |                                            |
| 119. BD*( 2) C 20 - C 22 | 0.32609 | 0.24950   | 128(v),100(v),121(v),99(v)<br>90(v),105(r) |
| 120. BD*( 1) C 21 - C 23 | 0.01680 | 0.85673   |                                            |
| 121. BD*( 2) C 21 - C 23 | 0.37368 | 0.23402   | 128(v),119(v),133(v)                       |
| 122. BD*( 1) C 21 - C 30 | 0.01343 | 0.82535   |                                            |
| 123. BD*( 1) C 22 - C 24 | 0.01105 | 0.87619   |                                            |
| 124. BD*( 1) C 22 - H 25 | 0.01101 | 0.73682   |                                            |
| 125. BD*( 1) C 23 - C 26 | 0.01035 | 0.88102   |                                            |

|                          |         |         |                     |
|--------------------------|---------|---------|---------------------|
| 126. BD*( 1) C 23 - H 27 | 0.00985 | 0.73315 |                     |
| 127. BD*( 1) C 24 - C 26 | 0.01090 | 0.87543 |                     |
| 128. BD*( 2) C 24 - C 26 | 0.33000 | 0.24783 | 119(v),121(v),89(r) |
| 129. BD*( 1) C 24 - H 28 | 0.01008 | 0.73487 |                     |
| 130. BD*( 1) C 26 - H 29 | 0.01016 | 0.73638 |                     |
| 131. BD*( 1) C 30 - C 31 | 0.00553 | 1.15687 |                     |
| 132. BD*( 2) C 30 - C 31 | 0.06538 | 0.42971 |                     |
| 133. BD*( 3) C 30 - C 31 | 0.10656 | 0.38987 | 137(v),121(v)       |
| 134. BD*( 1) C 31 - C 33 | 0.00569 | 0.89994 |                     |
| 135. BD*( 1) C 32 - C 33 | 0.00551 | 1.15708 |                     |
| 136. BD*( 2) C 32 - C 33 | 0.06545 | 0.42970 |                     |
| 137. BD*( 3) C 32 - C 33 | 0.10652 | 0.38993 | 133(v),107(v)       |
| 138. BD*( 1) C 34 - O 35 | 0.02023 | 0.92853 |                     |
| 139. BD*( 2) C 34 - O 35 | 0.18471 | 0.26436 | 95(v)               |
| 140. BD*( 1) C 34 - O 36 | 0.08446 | 0.69442 |                     |
| 141. BD*( 1) O 36 - C 37 | 0.01712 | 0.58847 |                     |
| 142. BD*( 1) C 37 - H 38 | 0.00705 | 0.69989 |                     |
| 143. BD*( 1) C 37 - H 39 | 0.01310 | 0.69316 |                     |
| 144. BD*( 1) C 37 - H 40 | 0.01313 | 0.69298 |                     |

-----  
Total Lewis 169.68730 ( 97.5214%)  
Valence non-Lewis 4.31270 ( 2.4786%)  
Rydberg non-Lewis 0.00000 ( 0.0000%)  
-----

Total unit 1 174.00000 (100.0000%)  
Charge unit 1 0.00000

NATURAL POPULATIONS: Natural atomic orbital occupancies

| NAO | Atom | No | lang | Type(AO) | Occupancy | Energy    |
|-----|------|----|------|----------|-----------|-----------|
| 1   | C    | 1  | S    | Cor( 1S) | 1.99994   | -10.97039 |
| 2   | C    | 1  | S    | Val( 2S) | 1.09019   | -0.20368  |
| 3   | C    | 1  | px   | Val( 2p) | 0.96388   | 0.14744   |
| 4   | C    | 1  | py   | Val( 2p) | 0.99018   | 0.12398   |
| 5   | C    | 1  | pz   | Val( 2p) | 0.96855   | 0.01184   |
| 6   | C    | 2  | S    | Cor( 1S) | 1.99990   | -10.98068 |
| 7   | C    | 2  | S    | Val( 2S) | 1.07951   | -0.20361  |
| 8   | C    | 2  | px   | Val( 2p) | 0.95421   | 0.15162   |
| 9   | C    | 2  | py   | Val( 2p) | 0.96269   | 0.14136   |
| 10  | C    | 2  | pz   | Val( 2p) | 1.00806   | 0.00481   |
| 11  | C    | 3  | S    | Cor( 1S) | 1.99994   | -10.96756 |
| 12  | C    | 3  | S    | Val( 2S) | 1.08760   | -0.20034  |
| 13  | C    | 3  | px   | Val( 2p) | 0.99001   | 0.13555   |
| 14  | C    | 3  | py   | Val( 2p) | 0.96939   | 0.13801   |
| 15  | C    | 3  | pz   | Val( 2p) | 0.97394   | 0.00570   |
| 16  | C    | 4  | S    | Cor( 1S) | 1.99990   | -10.97597 |

|    |   |    |    |          |         |           |
|----|---|----|----|----------|---------|-----------|
| 17 | C | 4  | S  | Val( 2S) | 1.08685 | -0.20983  |
| 18 | C | 4  | px | Val( 2p) | 0.97942 | 0.14817   |
| 19 | C | 4  | py | Val( 2p) | 0.96044 | 0.12848   |
| 20 | C | 4  | pz | Val( 2p) | 1.03717 | -0.00765  |
| 21 | C | 5  | S  | Cor( 1S) | 1.99994 | -10.96681 |
| 22 | C | 5  | S  | Val( 2S) | 1.08765 | -0.20015  |
| 23 | C | 5  | px | Val( 2p) | 0.98301 | 0.13789   |
| 24 | C | 5  | py | Val( 2p) | 0.97702 | 0.13518   |
| 25 | C | 5  | pz | Val( 2p) | 0.97283 | 0.00603   |
| 26 | C | 6  | S  | Cor( 1S) | 1.99990 | -10.98062 |
| 27 | C | 6  | S  | Val( 2S) | 1.07916 | -0.20323  |
| 28 | C | 6  | px | Val( 2p) | 0.94870 | 0.15062   |
| 29 | C | 6  | py | Val( 2p) | 0.96870 | 0.14227   |
| 30 | C | 6  | pz | Val( 2p) | 1.00809 | 0.00499   |
| 31 | H | 7  | S  | Val( 1S) | 0.94951 | 0.07408   |
| 32 | H | 8  | S  | Val( 1S) | 0.94670 | 0.07444   |
| 33 | H | 9  | S  | Val( 1S) | 0.94825 | 0.07281   |
| 34 | C | 10 | S  | Cor( 1S) | 1.99990 | -10.98966 |
| 35 | C | 10 | S  | Val( 2S) | 1.08694 | -0.21266  |
| 36 | C | 10 | px | Val( 2p) | 0.95928 | 0.12260   |
| 37 | C | 10 | py | Val( 2p) | 0.94934 | 0.11449   |
| 38 | C | 10 | pz | Val( 2p) | 0.96904 | 0.06318   |
| 39 | C | 11 | S  | Cor( 1S) | 1.99989 | -10.99620 |
| 40 | C | 11 | S  | Val( 2S) | 1.06621 | -0.19775  |
| 41 | C | 11 | px | Val( 2p) | 0.96529 | 0.12679   |
| 42 | C | 11 | py | Val( 2p) | 0.99174 | 0.09301   |
| 43 | C | 11 | pz | Val( 2p) | 0.99739 | 0.05026   |
| 44 | C | 12 | S  | Cor( 1S) | 1.99994 | -10.96118 |
| 45 | C | 12 | S  | Val( 2S) | 1.08456 | -0.19656  |
| 46 | C | 12 | px | Val( 2p) | 0.97135 | 0.13011   |
| 47 | C | 12 | py | Val( 2p) | 0.99418 | 0.09654   |
| 48 | C | 12 | pz | Val( 2p) | 0.99864 | 0.05451   |
| 49 | C | 13 | S  | Cor( 1S) | 1.99994 | -10.96885 |
| 50 | C | 13 | S  | Val( 2S) | 1.08324 | -0.19861  |
| 51 | C | 13 | px | Val( 2p) | 0.96616 | 0.12740   |
| 52 | C | 13 | py | Val( 2p) | 0.98573 | 0.09597   |
| 53 | C | 13 | pz | Val( 2p) | 0.98643 | 0.05541   |
| 54 | C | 14 | S  | Cor( 1S) | 1.99995 | -10.96500 |
| 55 | C | 14 | S  | Val( 2S) | 1.08239 | -0.19501  |
| 56 | C | 14 | px | Val( 2p) | 0.98428 | 0.12180   |
| 57 | C | 14 | py | Val( 2p) | 0.97680 | 0.10564   |
| 58 | C | 14 | pz | Val( 2p) | 0.98313 | 0.05940   |
| 59 | H | 15 | S  | Val( 1S) | 0.95468 | 0.07076   |
| 60 | C | 16 | S  | Cor( 1S) | 1.99994 | -10.96184 |
| 61 | C | 16 | S  | Val( 2S) | 1.07948 | -0.19219  |
| 62 | C | 16 | px | Val( 2p) | 0.98887 | 0.12178   |
| 63 | C | 16 | py | Val( 2p) | 0.98622 | 0.10262   |



|     |   |    |    |          |         |           |
|-----|---|----|----|----------|---------|-----------|
| 64  | C | 16 | pz | Val( 2p) | 0.98911 | 0.05973   |
| 65  | H | 17 | S  | Val( 1S) | 0.95078 | 0.06884   |
| 66  | H | 18 | S  | Val( 1S) | 0.95322 | 0.06961   |
| 67  | H | 19 | S  | Val( 1S) | 0.95288 | 0.07108   |
| 68  | C | 20 | S  | Cor( 1S) | 1.99990 | -10.98952 |
| 69  | C | 20 | S  | Val( 2S) | 1.08681 | -0.21241  |
| 70  | C | 20 | px | Val( 2p) | 0.95179 | 0.13926   |
| 71  | C | 20 | py | Val( 2p) | 0.95679 | 0.09919   |
| 72  | C | 20 | pz | Val( 2p) | 0.96914 | 0.06224   |
| 73  | C | 21 | S  | Cor( 1S) | 1.99989 | -10.99609 |
| 74  | C | 21 | S  | Val( 2S) | 1.06617 | -0.19762  |
| 75  | C | 21 | px | Val( 2p) | 0.96667 | 0.13923   |
| 76  | C | 21 | py | Val( 2p) | 0.98945 | 0.08193   |
| 77  | C | 21 | pz | Val( 2p) | 0.99850 | 0.04914   |
| 78  | C | 22 | S  | Cor( 1S) | 1.99994 | -10.96101 |
| 79  | C | 22 | S  | Val( 2S) | 1.08454 | -0.19633  |
| 80  | C | 22 | px | Val( 2p) | 0.97193 | 0.14431   |
| 81  | C | 22 | py | Val( 2p) | 0.99327 | 0.08389   |
| 82  | C | 22 | pz | Val( 2p) | 0.99886 | 0.05356   |
| 83  | C | 23 | S  | Cor( 1S) | 1.99994 | -10.96876 |
| 84  | C | 23 | S  | Val( 2S) | 1.08323 | -0.19850  |
| 85  | C | 23 | px | Val( 2p) | 0.96329 | 0.14193   |
| 86  | C | 23 | py | Val( 2p) | 0.98848 | 0.08271   |
| 87  | C | 23 | pz | Val( 2p) | 0.98647 | 0.05452   |
| 88  | C | 24 | S  | Cor( 1S) | 1.99995 | -10.96485 |
| 89  | C | 24 | S  | Val( 2S) | 1.08239 | -0.19483  |
| 90  | C | 24 | px | Val( 2p) | 0.98062 | 0.13880   |
| 91  | C | 24 | py | Val( 2p) | 0.98057 | 0.08998   |
| 92  | C | 24 | pz | Val( 2p) | 0.98290 | 0.05862   |
| 93  | H | 25 | S  | Val( 1S) | 0.95455 | 0.07109   |
| 94  | C | 26 | S  | Cor( 1S) | 1.99994 | -10.96170 |
| 95  | C | 26 | S  | Val( 2S) | 1.07946 | -0.19204  |
| 96  | C | 26 | px | Val( 2p) | 0.99042 | 0.13522   |
| 97  | C | 26 | py | Val( 2p) | 0.98449 | 0.09054   |
| 98  | C | 26 | pz | Val( 2p) | 0.98930 | 0.05881   |
| 99  | H | 27 | S  | Val( 1S) | 0.95078 | 0.06892   |
| 100 | H | 28 | S  | Val( 1S) | 0.95316 | 0.06985   |
| 101 | H | 29 | S  | Val( 1S) | 0.95288 | 0.07123   |
| 102 | C | 30 | S  | Cor( 1S) | 1.99940 | -10.92292 |
| 103 | C | 30 | S  | Val( 2S) | 1.07841 | -0.19556  |
| 104 | C | 30 | px | Val( 2p) | 0.99840 | 0.17128   |
| 105 | C | 30 | py | Val( 2p) | 0.96754 | 0.08554   |
| 106 | C | 30 | pz | Val( 2p) | 0.95338 | 0.09202   |
| 107 | C | 31 | S  | Cor( 1S) | 1.99936 | -10.92404 |
| 108 | C | 31 | S  | Val( 2S) | 1.04685 | -0.16736  |
| 109 | C | 31 | px | Val( 2p) | 0.96426 | 0.24735   |
| 110 | C | 31 | py | Val( 2p) | 1.02702 | 0.04236   |

|     |   |    |    |          |         |           |
|-----|---|----|----|----------|---------|-----------|
| 111 | C | 31 | pz | Val( 2p) | 1.03275 | 0.03602   |
| 112 | C | 32 | S  | Cor( 1S) | 1.99940 | -10.92280 |
| 113 | C | 32 | S  | Val( 2S) | 1.07837 | -0.19543  |
| 114 | C | 32 | px | Val( 2p) | 0.99343 | 0.20776   |
| 115 | C | 32 | py | Val( 2p) | 0.97297 | 0.04685   |
| 116 | C | 32 | pz | Val( 2p) | 0.95359 | 0.09414   |
| 117 | C | 33 | S  | Cor( 1S) | 1.99936 | -10.92410 |
| 118 | C | 33 | S  | Val( 2S) | 1.04672 | -0.16741  |
| 119 | C | 33 | px | Val( 2p) | 0.96547 | 0.26183   |
| 120 | C | 33 | py | Val( 2p) | 1.02591 | 0.02703   |
| 121 | C | 33 | pz | Val( 2p) | 1.03225 | 0.03700   |
| 122 | C | 34 | S  | Cor( 1S) | 1.99991 | -11.11157 |
| 123 | C | 34 | S  | Val( 2S) | 1.04005 | -0.24435  |
| 124 | C | 34 | px | Val( 2p) | 0.77164 | 0.19051   |
| 125 | C | 34 | py | Val( 2p) | 0.90848 | 0.11267   |
| 126 | C | 34 | pz | Val( 2p) | 0.88592 | -0.02257  |
| 127 | O | 35 | S  | Cor( 1S) | 1.99999 | -20.08609 |
| 128 | O | 35 | S  | Val( 2S) | 1.80496 | -1.05119  |
| 129 | O | 35 | px | Val( 2p) | 1.57870 | -0.20216  |
| 130 | O | 35 | py | Val( 2p) | 1.63878 | -0.22835  |
| 131 | O | 35 | pz | Val( 2p) | 1.30071 | -0.14039  |
| 132 | O | 36 | S  | Cor( 1S) | 1.99999 | -20.20865 |
| 133 | O | 36 | S  | Val( 2S) | 1.72298 | -1.02190  |
| 134 | O | 36 | px | Val( 2p) | 1.40498 | -0.17741  |
| 135 | O | 36 | py | Val( 2p) | 1.32689 | -0.14636  |
| 136 | O | 36 | pz | Val( 2p) | 1.82064 | -0.35870  |
| 137 | C | 37 | S  | Cor( 1S) | 1.99982 | -11.03995 |
| 138 | C | 37 | S  | Val( 2S) | 1.08273 | -0.22552  |
| 139 | C | 37 | px | Val( 2p) | 1.03959 | 0.04007   |
| 140 | C | 37 | py | Val( 2p) | 0.80790 | 0.09375   |
| 141 | C | 37 | pz | Val( 2p) | 1.03538 | 0.04469   |
| 142 | H | 38 | S  | Val( 1S) | 0.94645 | 0.06172   |
| 143 | H | 39 | S  | Val( 1S) | 0.95197 | 0.05906   |
| 144 | H | 40 | S  | Val( 1S) | 0.95214 | 0.05883   |

### NBO Key

|                  |    |     |     |     |     |     |     |     |     |     |
|------------------|----|-----|-----|-----|-----|-----|-----|-----|-----|-----|
| Sorting of NBOs: | 82 | 81  | 80  | 83  | 65  | 71  | 64  | 70  | 59  | 63  |
| Sorting of NBOs: | 61 | 58  | 67  | 73  | 60  | 62  | 68  | 74  | 69  | 75  |
| Sorting of NBOs: | 66 | 72  | 79  | 77  | 76  | 78  | 51  | 48  | 44  | 84  |
| Sorting of NBOs: | 53 | 47  | 35  | 21  | 86  | 54  | 24  | 38  | 7   | 10  |
| Sorting of NBOs: | 22 | 36  | 19  | 33  | 12  | 17  | 31  | 26  | 40  | 5   |
| Sorting of NBOs: | 1  | 3   | 16  | 30  | 11  | 15  | 6   | 25  | 39  | 57  |
| Sorting of NBOs: | 56 | 9   | 14  | 55  | 28  | 4   | 42  | 29  | 43  | 23  |
| Sorting of NBOs: | 37 | 52  | 87  | 49  | 45  | 85  | 50  | 46  | 20  | 34  |
| Sorting of NBOs: | 8  | 18  | 32  | 27  | 41  | 13  | 2   | 107 | 121 | 95  |
| Sorting of NBOs: | 89 | 114 | 128 | 100 | 105 | 119 | 139 | 133 | 137 | 136 |

Sorting of NBOs: 132 141 144 143 140 142 98 112 126 115  
 Sorting of NBOs: 129 101 116 130 110 124 96 91 93 102  
 Sorting of NBOs: 103 108 117 122 106 120 90 88 92 104  
 Sorting of NBOs: 118 99 94 97 113 127 109 123 111 125  
 Sorting of NBOs: 134 138 131 135  
 Reordering of NBOs for storage: 82 81 80 83 65 71 64 70 59 63  
 Reordering of NBOs for storage: 61 58 67 73 60 62 68 74 69 75  
 Reordering of NBOs for storage: 66 72 79 77 76 78 51 48 44 84  
 Reordering of NBOs for storage: 53 47 35 21 86 54 24 38 7 10  
 Reordering of NBOs for storage: 22 36 19 33 12 17 31 26 40 5  
 Reordering of NBOs for storage: 1 3 16 30 11 15 6 25 39 57  
 Reordering of NBOs for storage: 56 9 14 55 28 4 42 29 43 23  
 Reordering of NBOs for storage: 37 52 87 49 45 85 50 46 20 34  
 Reordering of NBOs for storage: 8 18 32 27 41 13 2 107 121 95  
 Reordering of NBOs for storage: 89 114 128 100 105 119 139 133 137 136  
 Reordering of NBOs for storage: 132 141 144 143 140 142 98 112 126 115  
 Reordering of NBOs for storage: 129 101 116 130 110 124 96 91 93 102  
 Reordering of NBOs for storage: 103 108 117 122 106 120 90 88 92 104  
 Reordering of NBOs for storage: 118 99 94 97 113 127 109 123 111 125  
 Reordering of NBOs for storage: 134 138 131 135

## Coordinates

### 3.5-TPDY

HF = -1073.4528074 hartrees

Zero-point correction= 0.303750 (Hartree/Particle)

Thermal correction to Gibbs Free Energy= 0.254542

Sum of electronic and zero-point Energies= -1073.149057

Sum of electronic and thermal Enthalpies= -1073.127577

Sum of electronic and thermal Free Energies= -1073.198266

Standard orientation:

| -----  |        |        |                         |           |           |  |
|--------|--------|--------|-------------------------|-----------|-----------|--|
| Center | Atomic | Atomic | Coordinates (Angstroms) |           |           |  |
| Number | Number | Type   | X                       | Y         | Z         |  |
| -----  |        |        |                         |           |           |  |
| 1      | 6      | 0      | 0.164626                | -0.631977 | -0.564570 |  |
| 2      | 6      | 0      | -1.149909               | -0.163931 | -0.384627 |  |
| 3      | 6      | 0      | -1.342473               | 1.194859  | -0.094136 |  |
| 4      | 6      | 0      | -0.245429               | 2.056233  | 0.034849  |  |
| 5      | 6      | 0      | 1.057110                | 1.556298  | -0.081136 |  |
| 6      | 6      | 0      | 1.280548                | 0.203112  | -0.369472 |  |
| 7      | 1      | 0      | 0.322162                | -1.664218 | -0.852086 |  |
| 8      | 1      | 0      | -2.345751               | 1.576084  | 0.055178  |  |
| 9      | 1      | 0      | 1.894276                | 2.226936  | 0.078924  |  |
| 10     | 6      | 0      | -2.351011               | -1.056077 | -0.449589 |  |
| 11     | 6      | 0      | -2.465397               | -2.252508 | 0.327659  |  |
| 12     | 6      | 0      | -3.449755               | -0.677761 | -1.233430 |  |
| 13     | 6      | 0      | -3.653480               | -3.007184 | 0.289416  |  |
| 14     | 6      | 0      | -4.621814               | -1.438449 | -1.269227 |  |
| 15     | 1      | 0      | -3.379214               | 0.225512  | -1.832387 |  |
| 16     | 6      | 0      | -4.725577               | -2.603804 | -0.503719 |  |
| 17     | 1      | 0      | -3.721588               | -3.908874 | 0.889949  |  |
| 18     | 1      | 0      | -5.450036               | -1.120085 | -1.895546 |  |
| 19     | 1      | 0      | -5.635266               | -3.196331 | -0.525325 |  |
| 20     | 6      | 0      | 2.692400                | -0.293480 | -0.417369 |  |
| 21     | 6      | 0      | 3.145504                | -1.405094 | 0.362059  |  |
| 22     | 6      | 0      | 3.639928                | 0.395976  | -1.186391 |  |
| 23     | 6      | 0      | 4.504190                | -1.774062 | 0.340635  |  |
| 24     | 6      | 0      | 4.985011                | 0.016574  | -1.205575 |  |
| 25     | 1      | 0      | 3.312874                | 1.240253  | -1.786214 |  |
| 26     | 6      | 0      | 5.419028                | -1.068515 | -0.438081 |  |
| 27     | 1      | 0      | 4.828338                | -2.616933 | 0.943048  |  |
| 28     | 1      | 0      | 5.690128                | 0.568427  | -1.820245 |  |
| 29     | 1      | 0      | 6.463623                | -1.364805 | -0.446793 |  |
| 30     | 6      | 0      | 2.184755                | -2.127744 | 1.123155  |  |
| 31     | 6      | 0      | 1.137579                | -2.588211 | 1.561006  |  |
| 32     | 6      | 0      | -1.343892               | -2.659991 | 1.102825  |  |

|    |   |   |           |           |           |
|----|---|---|-----------|-----------|-----------|
| 33 | 6 | 0 | -0.212171 | -2.791233 | 1.552465  |
| 34 | 6 | 0 | -0.414020 | 3.507025  | 0.337269  |
| 35 | 8 | 0 | 0.512570  | 4.293126  | 0.471609  |
| 36 | 8 | 0 | -1.704697 | 3.871301  | 0.444579  |
| 37 | 6 | 0 | -1.958273 | 5.264123  | 0.738348  |
| 38 | 1 | 0 | -3.043467 | 5.355495  | 0.783631  |
| 39 | 1 | 0 | -1.510851 | 5.538034  | 1.697293  |
| 40 | 1 | 0 | -1.553091 | 5.900018  | -0.053111 |

---

### N<sub>2</sub>CO<sub>2</sub>Et

HF = -415.985719 hartrees

Zero-point correction= 0.104481 (Hartree/Particle)  
Thermal correction to Gibbs Free Energy= 0.070578  
Sum of electronic and zero-point Energies= -415.881238  
Sum of electronic and thermal Enthalpies= -415.871758  
Sum of electronic and thermal Free Energies= -415.915141

Standard orientation:

| Center<br>Number | Atomic<br>Number | Atomic<br>Type | Coordinates (Angstroms) |           |           |
|------------------|------------------|----------------|-------------------------|-----------|-----------|
|                  |                  |                | X                       | Y         | Z         |
| 1                | 6                | 0              | -0.226226               | 0.186871  | 0.000267  |
| 2                | 8                | 0              | -0.385511               | 1.402863  | 0.000161  |
| 3                | 8                | 0              | 0.974056                | -0.425173 | 0.000142  |
| 4                | 6                | 0              | -1.294324               | -0.801563 | 0.000206  |
| 5                | 7                | 0              | -2.523723               | -0.360542 | -0.000249 |
| 6                | 7                | 0              | -3.586841               | 0.039781  | -0.000248 |
| 7                | 1                | 0              | -1.150481               | -1.873596 | 0.000963  |
| 8                | 6                | 0              | 2.147825                | 0.438635  | -0.000086 |
| 9                | 1                | 0              | 2.109267                | 1.076827  | -0.888240 |
| 10               | 1                | 0              | 2.109535                | 1.076917  | 0.888016  |
| 11               | 6                | 0              | 3.365939                | -0.460385 | -0.000211 |
| 12               | 1                | 0              | 3.383824                | -1.097688 | -0.890349 |
| 13               | 1                | 0              | 4.270159                | 0.157706  | -0.000288 |
| 14               | 1                | 0              | 3.383997                | -1.097718 | 0.889903  |

### BnN<sub>3</sub>

HF = -435.1939152 hartrees

Zero-point correction= 0.132001 (Hartree/Particle)  
Thermal correction to Gibbs Free Energy= 0.096325  
Sum of electronic and zero-point Energies= -435.061915  
Sum of electronic and thermal Enthalpies= -435.052481  
Sum of electronic and thermal Free Energies= -435.097590

Standard orientation:

| Center<br>Number | Atomic<br>Number | Atomic<br>Type | Coordinates (Angstroms) |           |           |
|------------------|------------------|----------------|-------------------------|-----------|-----------|
|                  |                  |                | X                       | Y         | Z         |
| 1                | 7                | 0              | 2.707467                | -1.405230 | -0.812934 |
| 2                | 7                | 0              | 2.429421                | -0.355624 | -0.454129 |

|    |   |   |           |           |           |
|----|---|---|-----------|-----------|-----------|
| 3  | 7 | 0 | 2.206220  | 0.815777  | -0.149184 |
| 4  | 6 | 0 | 1.154370  | 1.016434  | 0.905977  |
| 5  | 1 | 0 | 1.494777  | 0.543591  | 1.833964  |
| 6  | 1 | 0 | 1.128299  | 2.096105  | 1.053751  |
| 7  | 6 | 0 | -0.194747 | 0.484463  | 0.486054  |
| 8  | 6 | 0 | -1.046132 | 1.259038  | -0.316764 |
| 9  | 6 | 0 | -0.592379 | -0.809303 | 0.853773  |
| 10 | 6 | 0 | -2.275601 | 0.749938  | -0.741515 |
| 11 | 1 | 0 | -0.742477 | 2.261810  | -0.607191 |
| 12 | 6 | 0 | -1.823315 | -1.320633 | 0.429349  |
| 13 | 1 | 0 | 0.059722  | -1.414553 | 1.478747  |
| 14 | 6 | 0 | -2.666611 | -0.541907 | -0.369047 |
| 15 | 1 | 0 | -2.929100 | 1.359903  | -1.359078 |
| 16 | 1 | 0 | -2.122443 | -2.322702 | 0.723911  |
| 17 | 1 | 0 | -3.624035 | -0.936801 | -0.697339 |

### N<sub>2</sub>CO<sub>2</sub>Et Pseudo-Endo S

HF = -1489.4230025 hartrees

Zero-point correction= 0.409244 (Hartree/Particle)

Thermal correction to Gibbs Free Energy= 0.345768

Sum of electronic and zero-point Energies= -1489.013759

Sum of electronic and thermal Enthalpies= -1488.982989

Sum of electronic and thermal Free Energies= -1489.077235

Standard orientation:

| Center<br>Number | Atomic<br>Number | Atomic<br>Type | Coordinates (Angstroms) |           |           |
|------------------|------------------|----------------|-------------------------|-----------|-----------|
|                  |                  |                | X                       | Y         | Z         |
| 1                | 6                | 0              | 1.194297                | -0.036866 | -1.087507 |
| 2                | 6                | 0              | 2.116805                | 0.939535  | -0.673396 |
| 3                | 6                | 0              | 3.238377                | 0.532459  | 0.061204  |
| 4                | 6                | 0              | 3.414658                | -0.817814 | 0.397050  |
| 5                | 6                | 0              | 2.448743                | -1.764148 | 0.032716  |
| 6                | 6                | 0              | 1.321501                | -1.379715 | -0.704984 |
| 7                | 1                | 0              | 0.354251                | 0.252297  | -1.707339 |
| 8                | 1                | 0              | 3.959714                | 1.269120  | 0.394923  |
| 9                | 1                | 0              | 2.576225                | -2.797079 | 0.338355  |
| 10               | 6                | 0              | 1.897011                | 2.393913  | -0.931980 |
| 11               | 6                | 0              | 0.671520                | 3.038095  | -0.572083 |
| 12               | 6                | 0              | 2.928123                | 3.180029  | -1.462434 |
| 13               | 6                | 0              | 0.531469                | 4.426062  | -0.758377 |
| 14               | 6                | 0              | 2.772131                | 4.556349  | -1.652560 |

|    |   |   |           |           |           |
|----|---|---|-----------|-----------|-----------|
| 15 | 1 | 0 | 3.862806  | 2.701098  | -1.740044 |
| 16 | 6 | 0 | 1.572050  | 5.180423  | -1.298691 |
| 17 | 1 | 0 | -0.401573 | 4.901836  | -0.472554 |
| 18 | 1 | 0 | 3.586188  | 5.136740  | -2.076999 |
| 19 | 1 | 0 | 1.446644  | 6.249673  | -1.441528 |
| 20 | 6 | 0 | 0.297065  | -2.398560 | -1.082628 |
| 21 | 6 | 0 | -1.076519 | -2.294959 | -0.704531 |
| 22 | 6 | 0 | 0.708586  | -3.520878 | -1.816367 |
| 23 | 6 | 0 | -1.972540 | -3.306662 | -1.111069 |
| 24 | 6 | 0 | -0.193234 | -4.510432 | -2.212838 |
| 25 | 1 | 0 | 1.755433  | -3.604454 | -2.094289 |
| 26 | 6 | 0 | -1.542330 | -4.395174 | -1.865698 |
| 27 | 1 | 0 | -3.014765 | -3.229223 | -0.821685 |
| 28 | 1 | 0 | 0.155955  | -5.360670 | -2.791448 |
| 29 | 1 | 0 | -2.255826 | -5.154886 | -2.171221 |
| 30 | 6 | 0 | -1.555866 | -1.185890 | 0.076935  |
| 31 | 6 | 0 | -1.593728 | 0.014790  | 0.451462  |
| 32 | 6 | 0 | -0.381115 | 2.241074  | -0.032343 |
| 33 | 6 | 0 | -1.044837 | 1.262085  | 0.278844  |
| 34 | 6 | 0 | 4.597071  | -1.288016 | 1.173909  |
| 35 | 8 | 0 | 4.786653  | -2.450579 | 1.501900  |
| 36 | 8 | 0 | 5.450175  | -0.293236 | 1.480742  |
| 37 | 6 | 0 | 6.625530  | -0.664081 | 2.236208  |
| 38 | 1 | 0 | 7.175334  | 0.264858  | 2.387768  |
| 39 | 1 | 0 | 6.339044  | -1.099748 | 3.196951  |
| 40 | 1 | 0 | 7.230400  | -1.379278 | 1.672651  |
| 41 | 7 | 0 | -3.114341 | -2.106628 | 1.499517  |
| 42 | 7 | 0 | -3.381513 | -1.124282 | 2.040702  |
| 43 | 6 | 0 | -3.143149 | 0.193432  | 2.096639  |
| 44 | 6 | 0 | -4.147453 | 1.113483  | 1.521598  |
| 45 | 8 | 0 | -4.071607 | 2.323374  | 1.665122  |
| 46 | 8 | 0 | -5.067461 | 0.477805  | 0.784467  |
| 47 | 6 | 0 | -6.041218 | 1.308519  | 0.080814  |
| 48 | 1 | 0 | -5.495747 | 1.987793  | -0.580878 |
| 49 | 1 | 0 | -6.585590 | 1.901608  | 0.821662  |
| 50 | 6 | 0 | -6.952364 | 0.374244  | -0.685036 |
| 51 | 1 | 0 | -7.699387 | 0.964586  | -1.226196 |
| 52 | 1 | 0 | -6.386189 | -0.216788 | -1.412121 |
| 53 | 1 | 0 | -7.475860 | -0.307167 | -0.006667 |
| 54 | 1 | 0 | -2.581671 | 0.529366  | 2.962148  |

---



## TSC

HF = -1489.4251436 hartrees

Zero-point correction= 0.409310 (Hartree/Particle)

Thermal correction to Gibbs Free Energy= 0.347612

Sum of electronic and zero-point Energies= -1489.015833

Sum of electronic and thermal Enthalpies= -1488.985223

Sum of electronic and thermal Free Energies= -1489.077532

Standard orientation:

| Center<br>Number | Atomic<br>Number | Atomic<br>Type | Coordinates (Angstroms) |           |           |
|------------------|------------------|----------------|-------------------------|-----------|-----------|
|                  |                  |                | X                       | Y         | Z         |
| 1                | 6                | 0              | -0.317070               | -0.377615 | -1.683264 |
| 2                | 6                | 0              | -1.634080               | -0.220686 | -1.219795 |
| 3                | 6                | 0              | -2.021574               | 1.025122  | -0.709345 |
| 4                | 6                | 0              | -1.103110               | 2.083731  | -0.650733 |
| 5                | 6                | 0              | 0.219404                | 1.891372  | -1.070413 |
| 6                | 6                | 0              | 0.628639                | 0.651194  | -1.574873 |
| 7                | 1                | 0              | -0.011803               | -1.325811 | -2.110291 |
| 8                | 1                | 0              | -3.028604               | 1.162097  | -0.332765 |
| 9                | 1                | 0              | 0.931323                | 2.704055  | -0.974008 |
| 10               | 6                | 0              | -2.594178               | -1.364421 | -1.183266 |
| 11               | 6                | 0              | -2.261815               | -2.590924 | -0.526785 |
| 12               | 6                | 0              | -3.876786               | -1.229222 | -1.728658 |
| 13               | 6                | 0              | -3.214989               | -3.622860 | -0.451923 |
| 14               | 6                | 0              | -4.812263               | -2.266126 | -1.655369 |
| 15               | 1                | 0              | -4.139328               | -0.300438 | -2.227312 |
| 16               | 6                | 0              | -4.480278               | -3.464526 | -1.016425 |
| 17               | 1                | 0              | -2.952059               | -4.544816 | 0.057435  |
| 18               | 1                | 0              | -5.795829               | -2.136140 | -2.097423 |
| 19               | 1                | 0              | -5.204099               | -4.271801 | -0.954243 |
| 20               | 6                | 0              | 2.057437                | 0.435373  | -1.954628 |
| 21               | 6                | 0              | 2.883878                | -0.502442 | -1.267916 |
| 22               | 6                | 0              | 2.624013                | 1.206125  | -2.978815 |
| 23               | 6                | 0              | 4.234417                | -0.636755 | -1.648007 |
| 24               | 6                | 0              | 3.960294                | 1.050565  | -3.355659 |
| 25               | 1                | 0              | 1.997542                | 1.929820  | -3.492836 |
| 26               | 6                | 0              | 4.765035                | 0.120152  | -2.690289 |
| 27               | 1                | 0              | 4.862845                | -1.337285 | -1.107153 |
| 28               | 1                | 0              | 4.368849                | 1.653467  | -4.161375 |
| 29               | 1                | 0              | 5.806264                | -0.006065 | -2.972434 |
| 30               | 6                | 0              | 2.356164                | -1.274758 | -0.176210 |
| 31               | 6                | 0              | 1.478214                | -1.958370 | 0.410668  |
| 32               | 6                | 0              | -0.960543               | -2.715352 | 0.045368  |
| 33               | 6                | 0              | 0.207727                | -2.470232 | 0.311435  |

|    |   |   |           |           |           |
|----|---|---|-----------|-----------|-----------|
| 34 | 6 | 0 | -1.472045 | 3.416949  | -0.095908 |
| 35 | 8 | 0 | -0.736116 | 4.393056  | -0.103105 |
| 36 | 8 | 0 | -2.712852 | 3.440163  | 0.425608  |
| 37 | 6 | 0 | -3.153972 | 4.700423  | 0.978921  |
| 38 | 1 | 0 | -4.166881 | 4.518576  | 1.338220  |
| 39 | 1 | 0 | -2.504378 | 5.002860  | 1.804395  |
| 40 | 1 | 0 | -3.155056 | 5.475679  | 0.208215  |
| 41 | 7 | 0 | 3.820221  | -0.872915 | 1.490227  |
| 42 | 7 | 0 | 3.213755  | -1.372714 | 2.336376  |
| 43 | 6 | 0 | 2.073918  | -2.016254 | 2.621832  |
| 44 | 6 | 0 | 0.939098  | -1.231799 | 3.157820  |
| 45 | 8 | 0 | -0.061598 | -1.771937 | 3.601327  |
| 46 | 8 | 0 | 1.102226  | 0.086997  | 3.000642  |
| 47 | 6 | 0 | -0.055602 | 0.933985  | 3.278624  |
| 48 | 1 | 0 | -0.308658 | 0.836365  | 4.338522  |
| 49 | 1 | 0 | -0.894172 | 0.566035  | 2.680491  |
| 50 | 6 | 0 | 0.329519  | 2.349017  | 2.906655  |
| 51 | 1 | 0 | -0.525143 | 3.011336  | 3.079730  |
| 52 | 1 | 0 | 1.168901  | 2.701870  | 3.514472  |
| 53 | 1 | 0 | 0.605563  | 2.411970  | 1.850536  |
| 54 | 1 | 0 | 2.176892  | -3.048603 | 2.937575  |

-----  
**N<sub>2</sub>CO<sub>2</sub>Et Pseudo-Exo R**

HF = -1489.4195728 hartrees

Zero-point correction= 0.409269 (Hartree/Particle)

Thermal correction to Gibbs Free Energy= 0.346066

Sum of electronic and zero-point Energies= -1489.010304

Sum of electronic and thermal Enthalpies= -1488.979568

Sum of electronic and thermal Free Energies= -1489.073507

Standard orientation:

-----

| Center<br>Number | Atomic<br>Number | Atomic<br>Type | Coordinates (Angstroms) |           |           |
|------------------|------------------|----------------|-------------------------|-----------|-----------|
|                  |                  |                | X                       | Y         | Z         |
| 1                | 6                | 0              | 1.406822                | 0.182642  | -1.161944 |
| 2                | 6                | 0              | 2.618927                | 0.515709  | -0.535141 |
| 3                | 6                | 0              | 3.285614                | -0.474541 | 0.198548  |
| 4                | 6                | 0              | 2.731816                | -1.757498 | 0.324784  |
| 5                | 6                | 0              | 1.486904                | -2.047196 | -0.250433 |
| 6                | 6                | 0              | 0.807426                | -1.072698 | -0.990147 |
| 7                | 1                | 0              | 0.905008                | 0.919739  | -1.777496 |
| 8                | 1                | 0              | 4.220636                | -0.239896 | 0.693846  |
| 9                | 1                | 0              | 1.050342                | -3.029946 | -0.107323 |
| 10               | 6                | 0              | 3.162469                | 1.906336  | -0.574193 |
| 11               | 6                | 0              | 2.362043                | 3.029457  | -0.190657 |

-----

|    |   |   |           |           |           |
|----|---|---|-----------|-----------|-----------|
| 12 | 6 | 0 | 4.500348  | 2.132467  | -0.921300 |
| 13 | 6 | 0 | 2.928912  | 4.317577  | -0.180562 |
| 14 | 6 | 0 | 5.048248  | 3.418930  | -0.915837 |
| 15 | 1 | 0 | 5.116209  | 1.286024  | -1.211955 |
| 16 | 6 | 0 | 4.260284  | 4.512992  | -0.545911 |
| 17 | 1 | 0 | 2.313005  | 5.159457  | 0.120366  |
| 18 | 1 | 0 | 6.086170  | 3.563514  | -1.201294 |
| 19 | 1 | 0 | 4.680777  | 5.514273  | -0.537967 |
| 20 | 6 | 0 | -0.526880 | -1.364493 | -1.596722 |
| 21 | 6 | 0 | -1.708406 | -0.666340 | -1.210574 |
| 22 | 6 | 0 | -0.621467 | -2.352000 | -2.587121 |
| 23 | 6 | 0 | -2.916563 | -0.950410 | -1.875351 |
| 24 | 6 | 0 | -1.831181 | -2.632235 | -3.227039 |
| 25 | 1 | 0 | 0.278137  | -2.891287 | -2.870590 |
| 26 | 6 | 0 | -2.978658 | -1.914610 | -2.879546 |
| 27 | 1 | 0 | -3.811120 | -0.404269 | -1.600729 |
| 28 | 1 | 0 | -1.872004 | -3.396153 | -3.998032 |
| 29 | 1 | 0 | -3.922677 | -2.110163 | -3.379710 |
| 30 | 6 | 0 | -1.667323 | 0.323207  | -0.151314 |
| 31 | 6 | 0 | -1.113404 | 1.342363  | 0.339297  |
| 32 | 6 | 0 | 1.004965  | 2.796840  | 0.183562  |
| 33 | 6 | 0 | -0.069116 | 2.223131  | 0.316012  |
| 34 | 6 | 0 | 3.412625  | -2.835839 | 1.096860  |
| 35 | 8 | 0 | 2.957322  | -3.959358 | 1.257046  |
| 36 | 8 | 0 | 4.596247  | -2.447150 | 1.606229  |
| 37 | 6 | 0 | 5.321395  | -3.434205 | 2.374154  |
| 38 | 1 | 0 | 6.233814  | -2.933352 | 2.697888  |
| 39 | 1 | 0 | 4.732546  | -3.752080 | 3.238580  |
| 40 | 1 | 0 | 5.560638  | -4.300599 | 1.751919  |
| 41 | 7 | 0 | -2.733317 | 0.626784  | 2.292675  |
| 42 | 7 | 0 | -2.086495 | 1.575569  | 2.385243  |
| 43 | 6 | 0 | -3.056076 | -0.404693 | 1.490943  |
| 44 | 6 | 0 | -4.461664 | -0.497394 | 1.030270  |
| 45 | 8 | 0 | -4.935483 | -1.528942 | 0.582395  |
| 46 | 8 | 0 | -5.102973 | 0.676352  | 1.104834  |
| 47 | 6 | 0 | -6.481505 | 0.709567  | 0.622795  |
| 48 | 1 | 0 | -6.484281 | 0.404882  | -0.427854 |
| 49 | 1 | 0 | -7.063702 | -0.015812 | 1.198911  |
| 50 | 6 | 0 | -6.985072 | 2.124269  | 0.808423  |
| 51 | 1 | 0 | -6.380208 | 2.834187  | 0.235181  |
| 52 | 1 | 0 | -8.019488 | 2.186382  | 0.454176  |
| 53 | 1 | 0 | -6.963311 | 2.413408  | 1.864047  |
| 54 | 1 | 0 | -2.571610 | -1.339999 | 1.757438  |

-----  
**N<sub>2</sub>CO<sub>2</sub>Et Pseudo-Exo S**

HF = -1489.4239634 hartrees

Zero-point correction= 0.409637 (Hartree/Particle)  
 Thermal correction to Gibbs Free Energy= 0.348111  
 Sum of electronic and zero-point Energies= -1489.014326  
 Sum of electronic and thermal Enthalpies= -1488.983783  
 Sum of electronic and thermal Free Energies= -1489.075852

Standard orientation:

| -----  |        |        |                         |           |           |
|--------|--------|--------|-------------------------|-----------|-----------|
| Center | Atomic | Atomic | Coordinates (Angstroms) |           |           |
| Number | Number | Type   | X                       | Y         | Z         |
| -----  |        |        |                         |           |           |
| 1      | 6      | 0      | 1.144030                | -0.389125 | 1.199616  |
| 2      | 6      | 0      | 2.325687                | 0.100665  | 0.618220  |
| 3      | 6      | 0      | 2.332263                | 1.410067  | 0.118512  |
| 4      | 6      | 0      | 1.172335                | 2.197035  | 0.175149  |
| 5      | 6      | 0      | -0.013563               | 1.664639  | 0.697152  |
| 6      | 6      | 0      | -0.040196               | 0.360221  | 1.203191  |
| 7      | 1      | 0      | 1.136036                | -1.379838 | 1.637890  |
| 8      | 1      | 0      | 3.230761                | 1.806953  | -0.339566 |
| 9      | 1      | 0      | -0.915298               | 2.267634  | 0.691201  |
| 10     | 6      | 0      | 3.537869                | -0.758140 | 0.461163  |
| 11     | 6      | 0      | 3.468428                | -2.044225 | -0.164208 |
| 12     | 6      | 0      | 4.792994                | -0.283283 | 0.862679  |
| 13     | 6      | 0      | 4.646135                | -2.792415 | -0.350501 |
| 14     | 6      | 0      | 5.953549                | -1.041552 | 0.680328  |
| 15     | 1      | 0      | 4.856745                | 0.692165  | 1.336499  |
| 16     | 6      | 0      | 5.879251                | -2.298860 | 0.073318  |
| 17     | 1      | 0      | 4.579770                | -3.761862 | -0.834601 |
| 18     | 1      | 0      | 6.910411                | -0.650078 | 1.013199  |
| 19     | 1      | 0      | 6.777652                | -2.891069 | -0.073772 |
| 20     | 6      | 0      | -1.316566               | -0.210719 | 1.728893  |
| 21     | 6      | 0      | -1.954460               | -1.331534 | 1.124655  |
| 22     | 6      | 0      | -1.931168               | 0.398991  | 2.832214  |
| 23     | 6      | 0      | -3.162407               | -1.806694 | 1.670633  |
| 24     | 6      | 0      | -3.126134               | -0.088177 | 3.365828  |
| 25     | 1      | 0      | -1.450652               | 1.262851  | 3.282848  |
| 26     | 6      | 0      | -3.738038               | -1.203245 | 2.786115  |
| 27     | 1      | 0      | -3.651688               | -2.655510 | 1.204080  |
| 28     | 1      | 0      | -3.573246               | 0.399216  | 4.227266  |
| 29     | 1      | 0      | -4.666565               | -1.594102 | 3.191803  |
| 30     | 6      | 0      | -1.381412               | -1.969698 | -0.044413 |
| 31     | 6      | 0      | -0.376592               | -2.448806 | -0.630510 |
| 32     | 6      | 0      | 2.194512                | -2.524055 | -0.590509 |
| 33     | 6      | 0      | 0.976220                | -2.607413 | -0.693925 |
| 34     | 6      | 0      | 1.139360                | 3.593384  | -0.345159 |
| 35     | 8      | 0      | 0.145731                | 4.306316  | -0.337416 |
| 36     | 8      | 0      | 2.327847                | 4.000967  | -0.826913 |

|    |   |   |           |           |           |
|----|---|---|-----------|-----------|-----------|
| 37 | 6 | 0 | 2.380690  | 5.346100  | -1.353739 |
| 38 | 1 | 0 | 3.407190  | 5.481742  | -1.694487 |
| 39 | 1 | 0 | 1.683099  | 5.455776  | -2.188072 |
| 40 | 1 | 0 | 2.138045  | 6.070684  | -0.571993 |
| 41 | 7 | 0 | -2.296553 | -2.659544 | -2.470052 |
| 42 | 7 | 0 | -1.265598 | -3.114161 | -2.702941 |
| 43 | 6 | 0 | -3.010016 | -1.952959 | -1.579065 |
| 44 | 1 | 0 | -3.862719 | -2.463557 | -1.145288 |
| 45 | 6 | 0 | -3.067962 | -0.495778 | -1.861854 |
| 46 | 8 | 0 | -2.390770 | 0.075522  | -2.700884 |
| 47 | 8 | 0 | -3.902263 | 0.099160  | -1.003501 |
| 48 | 6 | 0 | -3.906546 | 1.561031  | -1.001405 |
| 49 | 1 | 0 | -2.872088 | 1.904988  | -0.913825 |
| 50 | 1 | 0 | -4.308828 | 1.902342  | -1.959858 |
| 51 | 6 | 0 | -4.755847 | 2.003859  | 0.169621  |
| 52 | 1 | 0 | -4.336105 | 1.643912  | 1.113822  |
| 53 | 1 | 0 | -4.784512 | 3.098396  | 0.196895  |
| 54 | 1 | 0 | -5.781825 | 1.633687  | 0.074620  |

-----  
**TSA**

HF = -1050.8598628 hartrees

Zero-point correction= 0.334021 (Hartree/Particle)

Thermal correction to Gibbs Free Energy= 0.275747

Sum of electronic and zero-point Energies= -1050.525842

Sum of electronic and thermal Enthalpies= -1050.502670

Sum of electronic and thermal Free Energies= -1050.584116

Standard orientation:

-----

| Center<br>Number | Atomic<br>Number | Atomic<br>Type | Coordinates (Angstroms) |           |           |
|------------------|------------------|----------------|-------------------------|-----------|-----------|
|                  |                  |                | X                       | Y         | Z         |
| 1                | 6                | 0              | -0.932712               | 4.440809  | 0.737110  |
| 2                | 6                | 0              | -0.281355               | 3.207582  | 0.784672  |
| 3                | 6                | 0              | -0.728674               | 2.136867  | -0.017503 |
| 4                | 6                | 0              | -1.839131               | 2.331503  | -0.862679 |
| 5                | 6                | 0              | -2.479649               | 3.569677  | -0.908692 |
| 6                | 6                | 0              | -2.032345               | 4.627332  | -0.108226 |
| 7                | 1                | 0              | -0.580574               | 5.256685  | 1.362011  |
| 8                | 1                | 0              | 0.571794                | 3.062099  | 1.440233  |
| 9                | 1                | 0              | -2.187292               | 1.509354  | -1.479197 |
| 10               | 1                | 0              | -3.330687               | 3.708263  | -1.569491 |
| 11               | 1                | 0              | -2.536813               | 5.588629  | -0.142642 |
| 12               | 6                | 0              | -0.017582               | 0.883878  | 0.026168  |
| 13               | 6                | 0              | 1.032857                | 0.193938  | 0.035432  |
| 14               | 6                | 0              | 2.377268                | -0.054249 | -0.016985 |
| 15               | 6                | 0              | 3.575645                | -0.296868 | -0.055471 |

|    |   |   |           |           |           |
|----|---|---|-----------|-----------|-----------|
| 16 | 6 | 0 | 4.973402  | -0.567586 | -0.103721 |
| 17 | 6 | 0 | 5.439006  | -1.889259 | -0.281182 |
| 18 | 6 | 0 | 5.912299  | 0.479650  | 0.025554  |
| 19 | 6 | 0 | 6.807943  | -2.150527 | -0.328529 |
| 20 | 1 | 0 | 4.720952  | -2.697445 | -0.380700 |
| 21 | 6 | 0 | 7.278952  | 0.206625  | -0.020769 |
| 22 | 1 | 0 | 5.559437  | 1.497443  | 0.160740  |
| 23 | 6 | 0 | 7.731364  | -1.106354 | -0.198138 |
| 24 | 1 | 0 | 7.155019  | -3.170623 | -0.466162 |
| 25 | 1 | 0 | 7.992431  | 1.019501  | 0.080355  |
| 26 | 1 | 0 | 8.796859  | -1.314527 | -0.234598 |
| 27 | 7 | 0 | -0.888738 | -1.575887 | 0.250564  |
| 28 | 7 | 0 | -1.593507 | -0.541137 | 0.135567  |
| 29 | 7 | 0 | 0.227008  | -1.914826 | 0.177705  |
| 30 | 6 | 0 | -2.797220 | -0.392809 | 0.987646  |
| 31 | 1 | 0 | -3.008212 | 0.677735  | 0.970244  |
| 32 | 1 | 0 | -2.559750 | -0.683727 | 2.016378  |
| 33 | 6 | 0 | -3.975241 | -1.175368 | 0.450706  |
| 34 | 6 | 0 | -4.188392 | -2.498663 | 0.861067  |
| 35 | 6 | 0 | -4.845340 | -0.600236 | -0.486046 |
| 36 | 6 | 0 | -5.255352 | -3.238152 | 0.341951  |
| 37 | 1 | 0 | -3.516871 | -2.949295 | 1.588004  |
| 38 | 6 | 0 | -5.912891 | -1.337594 | -1.006396 |
| 39 | 1 | 0 | -4.686135 | 0.426660  | -0.805415 |
| 40 | 6 | 0 | -6.119138 | -2.658847 | -0.594075 |
| 41 | 1 | 0 | -5.412927 | -4.262312 | 0.668695  |
| 42 | 1 | 0 | -6.583450 | -0.881520 | -1.729533 |
| 43 | 1 | 0 | -6.949413 | -3.232049 | -0.997146 |

---

### TSB-Pseudo Exo

HF = -1508.6327564 hartrees

Zero-point correction= 0.436674 (Hartree/Particle)

Thermal correction to Gibbs Free Energy= 0.372246

Sum of electronic and zero-point Energies= -1508.196082

Sum of electronic and thermal Enthalpies= -1508.165427

Sum of electronic and thermal Free Energies= -1508.260510

Standard orientation:

| Center<br>Number | Atomic<br>Number | Atomic<br>Type | Coordinates (Angstroms) |           |           |
|------------------|------------------|----------------|-------------------------|-----------|-----------|
|                  |                  |                | X                       | Y         | Z         |
| 1                | 6                | 0              | 1.993064                | -0.187600 | 1.124206  |
| 2                | 6                | 0              | 3.171032                | -0.301659 | 0.366020  |
| 3                | 6                | 0              | 3.594698                | 0.804846  | -0.382368 |
| 4                | 6                | 0              | 2.839040                | 1.986402  | -0.392695 |
| 5                | 6                | 0              | 1.632904                | 2.055352  | 0.315979  |
| 6                | 6                | 0              | 1.192325                | 0.962564  | 1.072924  |
| 7                | 1                | 0              | 1.683272                | -1.011986 | 1.755070  |
| 8                | 1                | 0              | 4.497898                | 0.737635  | -0.977533 |
| 9                | 1                | 0              | 1.036673                | 2.959956  | 0.262511  |
| 10               | 6                | 0              | 3.939736                | -1.580167 | 0.285790  |
| 11               | 6                | 0              | 3.306494                | -2.814977 | -0.063626 |
| 12               | 6                | 0              | 5.327610                | -1.578121 | 0.476475  |
| 13               | 6                | 0              | 4.081753                | -3.981520 | -0.201831 |
| 14               | 6                | 0              | 6.084195                | -2.746716 | 0.346761  |
| 15               | 1                | 0              | 5.818981                | -0.646452 | 0.742158  |
| 16               | 6                | 0              | 5.459890                | -3.950527 | 0.006498  |
| 17               | 1                | 0              | 3.588200                | -4.908988 | -0.475379 |
| 18               | 1                | 0              | 7.157028                | -2.714557 | 0.513133  |
| 19               | 1                | 0              | 6.042852                | -4.860763 | -0.098327 |
| 20               | 6                | 0              | -0.102657               | 1.043443  | 1.813661  |
| 21               | 6                | 0              | -1.184558               | 0.144375  | 1.576725  |
| 22               | 6                | 0              | -0.274958               | 2.061653  | 2.762977  |
| 23               | 6                | 0              | -2.368961               | 0.283257  | 2.328865  |
| 24               | 6                | 0              | -1.456700               | 2.189799  | 3.495677  |
| 25               | 1                | 0              | 0.544098                | 2.753989  | 2.935907  |
| 26               | 6                | 0              | -2.503849               | 1.288353  | 3.283284  |
| 27               | 1                | 0              | -3.184714               | -0.407605 | 2.145431  |
| 28               | 1                | 0              | -1.554161               | 2.983411  | 4.230691  |
| 29               | 1                | 0              | -3.425293               | 1.370585  | 3.852264  |
| 30               | 6                | 0              | -1.068299               | -0.897385 | 0.587096  |
| 31               | 6                | 0              | -0.461194               | -1.808822 | -0.026860 |
| 32               | 6                | 0              | 1.893665                | -2.822736 | -0.261684 |
| 33               | 6                | 0              | 0.726763                | -2.454464 | -0.230050 |

|    |   |   |           |           |           |
|----|---|---|-----------|-----------|-----------|
| 34 | 6 | 0 | 3.259757  | 3.184127  | -1.174675 |
| 35 | 8 | 0 | 2.623881  | 4.227124  | -1.230138 |
| 36 | 8 | 0 | 4.426574  | 3.003825  | -1.820230 |
| 37 | 6 | 0 | 4.906292  | 4.118989  | -2.605198 |
| 38 | 1 | 0 | 5.846892  | 3.781065  | -3.040145 |
| 39 | 1 | 0 | 4.188696  | 4.367502  | -3.391470 |
| 40 | 1 | 0 | 5.071410  | 4.990990  | -1.967007 |
| 41 | 7 | 0 | -3.037108 | -0.912240 | -0.378270 |
| 42 | 7 | 0 | -2.774495 | -1.794182 | -1.227338 |
| 43 | 7 | 0 | -1.982892 | -2.593935 | -1.528865 |
| 44 | 6 | 0 | -3.733973 | 0.321407  | -0.821815 |
| 45 | 1 | 0 | -3.485962 | 1.058610  | -0.056533 |
| 46 | 1 | 0 | -3.316772 | 0.656939  | -1.776731 |
| 47 | 6 | 0 | -5.231429 | 0.128554  | -0.908386 |
| 48 | 6 | 0 | -5.814258 | -0.346620 | -2.091493 |
| 49 | 6 | 0 | -6.048319 | 0.391577  | 0.199827  |
| 50 | 6 | 0 | -7.194016 | -0.558383 | -2.165695 |
| 51 | 1 | 0 | -5.185593 | -0.550801 | -2.955048 |
| 52 | 6 | 0 | -7.428623 | 0.181304  | 0.127873  |
| 53 | 1 | 0 | -5.601580 | 0.763503  | 1.118470  |
| 54 | 6 | 0 | -8.003833 | -0.295719 | -1.055008 |
| 55 | 1 | 0 | -7.635963 | -0.924690 | -3.088153 |
| 56 | 1 | 0 | -8.053216 | 0.391816  | 0.991664  |
| 57 | 1 | 0 | -9.076459 | -0.458773 | -1.112258 |

---



**TSB**

HF = -1508.6335045 hartrees

Zero-point correction= 0.436586 (Hartree/Particle)

Thermal correction to Gibbs Free Energy= 0.373202

Sum of electronic and zero-point Energies= -1508.196919

Sum of electronic and thermal Enthalpies= -1508.166291

Sum of electronic and thermal Free Energies= -1508.260303

Standard orientation:

| Center<br>Number | Atomic<br>Number | Atomic<br>Type | Coordinates (Angstroms) |           |           |
|------------------|------------------|----------------|-------------------------|-----------|-----------|
|                  |                  |                | X                       | Y         | Z         |
| 1                | 6                | 0              | -1.441537               | -0.008798 | -1.061301 |
| 2                | 6                | 0              | -2.349106               | -0.994500 | -0.635705 |
| 3                | 6                | 0              | -3.500751               | -0.592728 | 0.053821  |
| 4                | 6                | 0              | -3.722108               | 0.763177  | 0.334994  |
| 5                | 6                | 0              | -2.771898               | 1.721709  | -0.038286 |
| 6                | 6                | 0              | -1.614508               | 1.343030  | -0.731027 |
| 7                | 1                | 0              | -0.576979               | -0.297560 | -1.646924 |
| 8                | 1                | 0              | -4.210552               | -1.336868 | 0.395491  |
| 9                | 1                | 0              | -2.934348               | 2.760791  | 0.227183  |
| 10               | 6                | 0              | -2.085513               | -2.451870 | -0.830782 |
| 11               | 6                | 0              | -0.859683               | -3.052678 | -0.402946 |
| 12               | 6                | 0              | -3.077758               | -3.283105 | -1.366279 |
| 13               | 6                | 0              | -0.680204               | -4.442685 | -0.529767 |
| 14               | 6                | 0              | -2.883289               | -4.661593 | -1.495945 |
| 15               | 1                | 0              | -4.012627               | -2.838437 | -1.695171 |
| 16               | 6                | 0              | -1.683058               | -5.242633 | -1.075590 |
| 17               | 1                | 0              | 0.252761                | -4.884300 | -0.193368 |
| 18               | 1                | 0              | -3.668046               | -5.277486 | -1.925488 |
| 19               | 1                | 0              | -1.528273               | -6.313218 | -1.171530 |
| 20               | 6                | 0              | -0.608342               | 2.380586  | -1.110295 |
| 21               | 6                | 0              | 0.751517                | 2.343204  | -0.674579 |
| 22               | 6                | 0              | -1.030419               | 3.462319  | -1.897118 |
| 23               | 6                | 0              | 1.624185                | 3.376763  | -1.073243 |
| 24               | 6                | 0              | -0.151162               | 4.474790  | -2.286557 |
| 25               | 1                | 0              | -2.067040               | 3.496469  | -2.219947 |
| 26               | 6                | 0              | 1.184358                | 4.425248  | -1.877739 |
| 27               | 1                | 0              | 2.654391                | 3.347037  | -0.737698 |
| 28               | 1                | 0              | -0.507736               | 5.292279  | -2.906438 |
| 29               | 1                | 0              | 1.880126                | 5.204276  | -2.175416 |
| 30               | 6                | 0              | 1.236477                | 1.267898  | 0.152450  |
| 31               | 6                | 0              | 1.267436                | 0.075666  | 0.540972  |
| 32               | 6                | 0              | 0.153024                | -2.207903 | 0.139546  |
| 33               | 6                | 0              | 0.774598                | -1.198049 | 0.440387  |
| 34               | 6                | 0              | -4.936775               | 1.228340  | 1.063762  |

|    |   |   |           |           |           |
|----|---|---|-----------|-----------|-----------|
| 35 | 8 | 0 | -5.172792 | 2.397811  | 1.331150  |
| 36 | 8 | 0 | -5.762007 | 0.219999  | 1.401386  |
| 37 | 6 | 0 | -6.964803 | 0.585246  | 2.115223  |
| 38 | 1 | 0 | -7.485560 | -0.354074 | 2.301629  |
| 39 | 1 | 0 | -6.713309 | 1.076745  | 3.058695  |
| 40 | 1 | 0 | -7.582063 | 1.250581  | 1.505864  |
| 41 | 7 | 0 | 2.802545  | 2.203936  | 1.515482  |
| 42 | 7 | 0 | 3.078951  | 1.205222  | 2.047243  |
| 43 | 7 | 0 | 2.724549  | 0.012106  | 2.189389  |
| 44 | 6 | 0 | 3.760300  | -1.049683 | 2.234031  |
| 45 | 1 | 0 | 4.251202  | -1.014791 | 3.212019  |
| 46 | 1 | 0 | 3.185834  | -1.976884 | 2.178989  |
| 47 | 6 | 0 | 4.760525  | -0.947982 | 1.105599  |
| 48 | 6 | 0 | 4.455692  | -1.466039 | -0.161600 |
| 49 | 6 | 0 | 5.978080  | -0.280090 | 1.296874  |
| 50 | 6 | 0 | 5.356255  | -1.322663 | -1.220105 |
| 51 | 1 | 0 | 3.509426  | -1.976900 | -0.316819 |
| 52 | 6 | 0 | 6.881055  | -0.135510 | 0.238419  |
| 53 | 1 | 0 | 6.219813  | 0.125888  | 2.276234  |
| 54 | 6 | 0 | 6.571193  | -0.656251 | -1.022106 |
| 55 | 1 | 0 | 5.110836  | -1.729969 | -2.197044 |
| 56 | 1 | 0 | 7.823339  | 0.381107  | 0.398780  |
| 57 | 1 | 0 | 7.272187  | -0.545313 | -1.844775 |

---

**TSD**

HF = -1864.0352728 hartrees

Zero-point correction= 0.492933 (Hartree/Particle)

Thermal correction to Gibbs Free Energy= 0.424285

Sum of electronic and zero-point Energies= -1863.542340

Sum of electronic and thermal Enthalpies= -1863.506944

Sum of electronic and thermal Free Energies= -1863.610988

Standard orientation:

| Center<br>Number | Atomic<br>Number | Atomic<br>Type | Coordinates (Angstroms) |           |           |
|------------------|------------------|----------------|-------------------------|-----------|-----------|
|                  |                  |                | X                       | Y         | Z         |
| 1                | 6                | 0              | 0.977053                | -1.411899 | -1.471278 |
| 2                | 6                | 0              | 2.206409                | -1.721142 | -0.869113 |
| 3                | 6                | 0              | 2.215700                | -2.623066 | 0.202688  |
| 4                | 6                | 0              | 1.015534                | -3.178735 | 0.672324  |
| 5                | 6                | 0              | -0.207748               | -2.806434 | 0.098827  |
| 6                | 6                | 0              | -0.234815               | -1.905582 | -0.970736 |
| 7                | 1                | 0              | 0.954821                | -0.758128 | -2.335082 |
| 8                | 1                | 0              | 3.151325                | -2.871335 | 0.689987  |
| 9                | 1                | 0              | -1.130453               | -3.209799 | 0.501864  |
| 10               | 6                | 0              | 3.467714                | -1.050503 | -1.301777 |
| 11               | 6                | 0              | 3.548688                | 0.373160  | -1.412218 |
| 12               | 6                | 0              | 4.625149                | -1.799100 | -1.547443 |
| 13               | 6                | 0              | 4.765709                | 0.982748  | -1.766306 |
| 14               | 6                | 0              | 5.827921                | -1.182606 | -1.906147 |
| 15               | 1                | 0              | 4.577848                | -2.881180 | -1.465476 |
| 16               | 6                | 0              | 5.898466                | 0.209352  | -2.016526 |
| 17               | 1                | 0              | 4.810932                | 2.065112  | -1.835656 |
| 18               | 1                | 0              | 6.706488                | -1.790800 | -2.100630 |
| 19               | 1                | 0              | 6.831519                | 0.691365  | -2.292556 |
| 20               | 6                | 0              | -1.518849               | -1.462723 | -1.587059 |
| 21               | 6                | 0              | -1.918761               | -0.094560 | -1.573491 |
| 22               | 6                | 0              | -2.336684               | -2.389473 | -2.243832 |
| 23               | 6                | 0              | -3.085079               | 0.298721  | -2.260688 |
| 24               | 6                | 0              | -3.502118               | -1.990477 | -2.903552 |
| 25               | 1                | 0              | -2.037942               | -3.433656 | -2.253741 |
| 26               | 6                | 0              | -3.866159               | -0.640412 | -2.927069 |
| 27               | 1                | 0              | -3.380285               | 1.341858  | -2.238047 |
| 28               | 1                | 0              | -4.116059               | -2.731049 | -3.407635 |
| 29               | 1                | 0              | -4.764144               | -0.321863 | -3.447263 |
| 30               | 6                | 0              | -1.157721               | 0.873557  | -0.838614 |
| 31               | 6                | 0              | -0.105864               | 1.510114  | -0.542970 |
| 32               | 6                | 0              | 2.380239                | 1.137521  | -1.126183 |
| 33               | 6                | 0              | 1.239654                | 1.473714  | -0.853626 |
| 34               | 6                | 0              | 0.987006                | -4.141725 | 1.810862  |

|    |   |   |           |           |           |
|----|---|---|-----------|-----------|-----------|
| 35 | 8 | 0 | -0.034457 | -4.635736 | 2.266304  |
| 36 | 8 | 0 | 2.212396  | -4.419519 | 2.291038  |
| 37 | 6 | 0 | 2.273660  | -5.337564 | 3.406328  |
| 38 | 1 | 0 | 3.333149  | -5.429453 | 3.645353  |
| 39 | 1 | 0 | 1.722628  | -4.934973 | 4.260213  |
| 40 | 1 | 0 | 1.859070  | -6.308686 | 3.123445  |
| 41 | 6 | 0 | -0.370808 | 2.803652  | 1.041330  |
| 42 | 6 | 0 | -2.574002 | 1.581289  | 0.862433  |
| 43 | 6 | 0 | -3.808282 | 0.775765  | 0.697503  |
| 44 | 6 | 0 | -3.814124 | -0.566045 | 1.104282  |
| 45 | 6 | 0 | -4.973098 | -1.315634 | 0.913951  |
| 46 | 1 | 0 | -2.928410 | -1.005212 | 1.548733  |
| 47 | 6 | 0 | -5.978032 | 0.642217  | -0.041824 |
| 48 | 6 | 0 | -6.081697 | -0.702054 | 0.329659  |
| 49 | 1 | 0 | -5.005155 | -2.359567 | 1.210379  |
| 50 | 1 | 0 | -6.821304 | 1.152335  | -0.501649 |
| 51 | 1 | 0 | -7.005056 | -1.246142 | 0.158507  |
| 52 | 6 | 0 | 0.930112  | 3.534005  | 1.130964  |
| 53 | 6 | 0 | 1.116872  | 4.738230  | 0.440981  |
| 54 | 6 | 0 | 2.363598  | 5.359084  | 0.515753  |
| 55 | 1 | 0 | 0.307701  | 5.170465  | -0.135822 |
| 56 | 6 | 0 | 3.087879  | 3.551022  | 1.915143  |
| 57 | 6 | 0 | 3.372813  | 4.757272  | 1.268059  |
| 58 | 1 | 0 | 2.541696  | 6.293692  | -0.007658 |
| 59 | 1 | 0 | 3.850761  | 3.047612  | 2.504460  |
| 60 | 1 | 0 | 4.359203  | 5.202346  | 1.351554  |
| 61 | 7 | 0 | -1.750936 | 1.235576  | 1.925240  |
| 62 | 7 | 0 | -0.644283 | 1.865764  | 2.041496  |
| 63 | 7 | 0 | -2.573909 | 2.909012  | 0.476893  |
| 64 | 7 | 0 | -1.465043 | 3.542091  | 0.590831  |
| 65 | 7 | 0 | -4.869326 | 1.371721  | 0.126071  |
| 66 | 7 | 0 | 1.897802  | 2.942832  | 1.848637  |

---

## Pseudo-Endo S

HF = -1489.5165663 hartrees

Zero-point correction= 0.414052 (Hartree/Particle)

Thermal correction to Gibbs Free Energy= 0.351188

Sum of electronic and zero-point Energies= -1489.102514

Sum of electronic and thermal Enthalpies= -1489.072876

Sum of electronic and thermal Free Energies= -1489.165378

Standard orientation:

| Center<br>Number | Atomic<br>Number | Atomic<br>Type | Coordinates (Angstroms) |           |           |
|------------------|------------------|----------------|-------------------------|-----------|-----------|
|                  |                  |                | X                       | Y         | Z         |
| 1                | 6                | 0              | 1.245217                | -0.051405 | -1.370931 |
| 2                | 6                | 0              | 2.151801                | 0.888171  | -0.860699 |
| 3                | 6                | 0              | 3.131484                | 0.459445  | 0.039951  |
| 4                | 6                | 0              | 3.159091                | -0.881224 | 0.460442  |
| 5                | 6                | 0              | 2.172146                | -1.778009 | 0.024870  |
| 6                | 6                | 0              | 1.200007                | -1.359903 | -0.889646 |
| 7                | 1                | 0              | 0.512402                | 0.261548  | -2.105861 |
| 8                | 1                | 0              | 3.839918                | 1.171077  | 0.448425  |
| 9                | 1                | 0              | 2.167383                | -2.793064 | 0.407654  |
| 10               | 6                | 0              | 1.912151                | 2.332536  | -1.124950 |
| 11               | 6                | 0              | 0.625763                | 2.878660  | -0.820096 |
| 12               | 6                | 0              | 2.912249                | 3.191303  | -1.588919 |
| 13               | 6                | 0              | 0.388144                | 4.252099  | -1.005231 |
| 14               | 6                | 0              | 2.660760                | 4.554663  | -1.776862 |
| 15               | 1                | 0              | 3.893494                | 2.783172  | -1.813696 |
| 16               | 6                | 0              | 1.398854                | 5.083515  | -1.488232 |
| 17               | 1                | 0              | -0.588897               | 4.657779  | -0.762050 |
| 18               | 1                | 0              | 3.450260                | 5.200960  | -2.149175 |
| 19               | 1                | 0              | 1.203036                | 6.141725  | -1.632884 |
| 20               | 6                | 0              | 0.106108                | -2.258549 | -1.365088 |
| 21               | 6                | 0              | -1.206257               | -2.218437 | -0.831991 |
| 22               | 6                | 0              | 0.394935                | -3.158944 | -2.402043 |
| 23               | 6                | 0              | -2.178123               | -3.087975 | -1.372207 |
| 24               | 6                | 0              | -0.580541               | -4.005799 | -2.929026 |
| 25               | 1                | 0              | 1.406271                | -3.185861 | -2.797507 |
| 26               | 6                | 0              | -1.878158               | -3.963084 | -2.413509 |
| 27               | 1                | 0              | -3.183934               | -3.070238 | -0.964902 |
| 28               | 1                | 0              | -0.328272               | -4.690269 | -3.733736 |
| 29               | 1                | 0              | -2.652620               | -4.611338 | -2.812803 |
| 30               | 6                | 0              | -1.658390               | -1.402240 | 0.321186  |
| 31               | 6                | 0              | -1.612592               | -0.083045 | 0.697824  |
| 32               | 6                | 0              | -0.369146               | 2.005024  | -0.282717 |
| 33               | 6                | 0              | -0.984297               | 1.041112  | 0.144395  |

|    |   |   |           |           |           |
|----|---|---|-----------|-----------|-----------|
| 34 | 6 | 0 | 4.186335  | -1.384033 | 1.416524  |
| 35 | 8 | 0 | 4.233840  | -2.532084 | 1.834272  |
| 36 | 8 | 0 | 5.071341  | -0.436668 | 1.778273  |
| 37 | 6 | 0 | 6.101865  | -0.841530 | 2.707903  |
| 38 | 1 | 0 | 6.701452  | 0.052304  | 2.880029  |
| 39 | 1 | 0 | 5.655679  | -1.188814 | 3.643368  |
| 40 | 1 | 0 | 6.714735  | -1.636042 | 2.274126  |
| 41 | 7 | 0 | -2.447973 | -2.113648 | 1.291163  |
| 42 | 7 | 0 | -2.874801 | -1.366997 | 2.209515  |
| 43 | 6 | 0 | -2.404490 | 0.009928  | 1.977388  |
| 44 | 6 | 0 | -3.602105 | 0.969373  | 1.919170  |
| 45 | 8 | 0 | -3.783896 | 1.870129  | 2.713326  |
| 46 | 8 | 0 | -4.395191 | 0.671967  | 0.891929  |
| 47 | 6 | 0 | -5.590618 | 1.496191  | 0.706793  |
| 48 | 1 | 0 | -5.269495 | 2.533893  | 0.578118  |
| 49 | 1 | 0 | -6.196659 | 1.424032  | 1.614468  |
| 50 | 6 | 0 | -6.313070 | 0.963455  | -0.510795 |
| 51 | 1 | 0 | -7.215590 | 1.559768  | -0.681657 |
| 52 | 1 | 0 | -5.681118 | 1.029632  | -1.402227 |
| 53 | 1 | 0 | -6.610752 | -0.079812 | -0.364822 |
| 54 | 1 | 0 | -1.781365 | 0.309527  | 2.826953  |

---

### **C (Pseudo-Endo R)**

HF = -1489.5195017 hartrees

Zero-point correction= 0.414524 (Hartree/Particle)

Thermal correction to Gibbs Free Energy= 0.354936

Sum of electronic and zero-point Energies= -1489.104978

Sum of electronic and thermal Enthalpies= -1489.075701

Sum of electronic and thermal Free Energies= -1489.164565

Standard orientation:

---

| Center<br>Number | Atomic<br>Number | Atomic<br>Type | Coordinates (Angstroms) |           |           |
|------------------|------------------|----------------|-------------------------|-----------|-----------|
|                  |                  |                | X                       | Y         | Z         |
| 1                | 6                | 0              | -0.168025               | -1.432903 | -1.361060 |
| 2                | 6                | 0              | -1.511779               | -1.105050 | -1.133586 |
| 3                | 6                | 0              | -1.929186               | 0.212912  | -1.338985 |
| 4                | 6                | 0              | -0.996882               | 1.190724  | -1.725996 |
| 5                | 6                | 0              | 0.362373                | 0.864539  | -1.841202 |
| 6                | 6                | 0              | 0.784956                | -0.453652 | -1.642296 |
| 7                | 1                | 0              | 0.158706                | -2.457565 | -1.221552 |
| 8                | 1                | 0              | -2.961441               | 0.488905  | -1.155751 |
| 9                | 1                | 0              | 1.081362                | 1.645530  | -2.064605 |
| 10               | 6                | 0              | -2.381438               | -2.103283 | -0.453169 |
| 11               | 6                | 0              | -1.949627               | -2.626265 | 0.806148  |

|    |   |   |           |           |           |
|----|---|---|-----------|-----------|-----------|
| 12 | 6 | 0 | -3.623601 | -2.499065 | -0.954865 |
| 13 | 6 | 0 | -2.765403 | -3.535133 | 1.501619  |
| 14 | 6 | 0 | -4.423662 | -3.409949 | -0.255912 |
| 15 | 1 | 0 | -3.960208 | -2.096738 | -1.906046 |
| 16 | 6 | 0 | -3.992824 | -3.930119 | 0.968311  |
| 17 | 1 | 0 | -2.432821 | -3.919280 | 2.460809  |
| 18 | 1 | 0 | -5.381384 | -3.712430 | -0.669318 |
| 19 | 1 | 0 | -4.613596 | -4.636662 | 1.511032  |
| 20 | 6 | 0 | 2.227330  | -0.843684 | -1.647028 |
| 21 | 6 | 0 | 2.998367  | -0.860062 | -0.458907 |
| 22 | 6 | 0 | 2.828121  | -1.223851 | -2.855690 |
| 23 | 6 | 0 | 4.352884  | -1.242144 | -0.533797 |
| 24 | 6 | 0 | 4.166824  | -1.615632 | -2.910761 |
| 25 | 1 | 0 | 2.230460  | -1.206309 | -3.762577 |
| 26 | 6 | 0 | 4.932087  | -1.626326 | -1.741598 |
| 27 | 1 | 0 | 4.951135  | -1.239091 | 0.372169  |
| 28 | 1 | 0 | 4.607966  | -1.905883 | -3.859948 |
| 29 | 1 | 0 | 5.975331  | -1.926792 | -1.768631 |
| 30 | 6 | 0 | 2.514107  | -0.414569 | 0.867790  |
| 31 | 6 | 0 | 1.455877  | -0.719872 | 1.683713  |
| 32 | 6 | 0 | -0.712872 | -2.147081 | 1.341062  |
| 33 | 6 | 0 | 0.336161  | -1.546853 | 1.513152  |
| 34 | 6 | 0 | -1.395676 | 2.607401  | -1.959101 |
| 35 | 8 | 0 | -0.656434 | 3.461420  | -2.426761 |
| 36 | 8 | 0 | -2.665985 | 2.859450  | -1.592670 |
| 37 | 6 | 0 | -3.137553 | 4.210952  | -1.794991 |
| 38 | 1 | 0 | -4.167438 | 4.212756  | -1.437884 |
| 39 | 1 | 0 | -2.532063 | 4.915921  | -1.220024 |
| 40 | 1 | 0 | -3.100045 | 4.472263  | -2.855759 |
| 41 | 7 | 0 | 3.350591  | 0.534605  | 1.550104  |
| 42 | 7 | 0 | 2.881921  | 0.866060  | 2.671410  |
| 43 | 6 | 0 | 1.626844  | 0.144536  | 2.912462  |
| 44 | 6 | 0 | 0.426570  | 1.092864  | 3.070241  |
| 45 | 8 | 0 | -0.467484 | 0.900777  | 3.869620  |
| 46 | 8 | 0 | 0.476382  | 2.082411  | 2.183126  |
| 47 | 6 | 0 | -0.670957 | 2.989680  | 2.120596  |
| 48 | 1 | 0 | -0.887834 | 3.343265  | 3.131998  |
| 49 | 1 | 0 | -1.526894 | 2.414144  | 1.754783  |
| 50 | 6 | 0 | -0.295194 | 4.118390  | 1.186566  |
| 51 | 1 | 0 | -1.148438 | 4.797111  | 1.083890  |
| 52 | 1 | 0 | 0.552709  | 4.686528  | 1.582087  |
| 53 | 1 | 0 | -0.032538 | 3.741759  | 0.194681  |
| 54 | 1 | 0 | 1.720669  | -0.433593 | 3.837237  |

---

### TSC Pseudo-Exo R

HF = -1489.5116077 hartrees

Zero-point correction= 0.414168 (Hartree/Particle)  
Thermal correction to Gibbs Free Energy= 0.352369  
Sum of electronic and zero-point Energies= -1489.097440  
Sum of electronic and thermal Enthalpies= -1489.067869  
Sum of electronic and thermal Free Energies= -1489.159239

Standard orientation:

| -----            |                  |                |                         |           |           |  |
|------------------|------------------|----------------|-------------------------|-----------|-----------|--|
| Center<br>Number | Atomic<br>Number | Atomic<br>Type | Coordinates (Angstroms) |           |           |  |
|                  |                  |                | X                       | Y         | Z         |  |
| -----            |                  |                |                         |           |           |  |
| 1                | 6                | 0              | -1.428831               | 0.364938  | 1.299651  |  |
| 2                | 6                | 0              | -2.640962               | 0.517400  | 0.614028  |  |
| 3                | 6                | 0              | -3.209696               | -0.601603 | -0.001883 |  |
| 4                | 6                | 0              | -2.535744               | -1.834963 | 0.024397  |  |
| 5                | 6                | 0              | -1.266107               | -1.935706 | 0.614344  |  |
| 6                | 6                | 0              | -0.702503               | -0.825678 | 1.249432  |  |
| 7                | 1                | 0              | -0.999146               | 1.217024  | 1.814203  |  |
| 8                | 1                | 0              | -4.145300               | -0.505674 | -0.540971 |  |
| 9                | 1                | 0              | -0.728330               | -2.876652 | 0.565636  |  |
| 10               | 6                | 0              | -3.158674               | 1.894265  | 0.388679  |  |
| 11               | 6                | 0              | -2.286012               | 2.863087  | -0.198958 |  |
| 12               | 6                | 0              | -4.475249               | 2.263539  | 0.677561  |  |
| 13               | 6                | 0              | -2.756892               | 4.162407  | -0.452665 |  |
| 14               | 6                | 0              | -4.931286               | 3.561168  | 0.421744  |  |
| 15               | 1                | 0              | -5.143918               | 1.528509  | 1.116468  |  |
| 16               | 6                | 0              | -4.071327               | 4.510471  | -0.138459 |  |
| 17               | 1                | 0              | -2.088806               | 4.888586  | -0.905048 |  |
| 18               | 1                | 0              | -5.955956               | 3.828785  | 0.662751  |  |
| 19               | 1                | 0              | -4.423541               | 5.518419  | -0.336313 |  |
| 20               | 6                | 0              | 0.666079                | -0.820688 | 1.848693  |  |
| 21               | 6                | 0              | 1.794658                | -0.341026 | 1.135971  |  |
| 22               | 6                | 0              | 0.819807                | -1.230451 | 3.180827  |  |
| 23               | 6                | 0              | 3.030462                | -0.264872 | 1.810598  |  |
| 24               | 6                | 0              | 2.053750                | -1.158458 | 3.828744  |  |
| 25               | 1                | 0              | -0.051397               | -1.601373 | 3.713185  |  |
| 26               | 6                | 0              | 3.160819                | -0.656848 | 3.141769  |  |
| 27               | 1                | 0              | 3.896932                | 0.133931  | 1.296091  |  |
| 28               | 1                | 0              | 2.144768                | -1.480844 | 4.861832  |  |
| 29               | 1                | 0              | 4.124996                | -0.573054 | 3.634240  |  |
| 30               | 6                | 0              | 1.778141                | -0.004761 | -0.310099 |  |
| 31               | 6                | 0              | 1.090307                | 0.896523  | -1.075089 |  |
| 32               | 6                | 0              | -0.965678               | 2.447125  | -0.566477 |  |
| 33               | 6                | 0              | 0.044806                | 1.801756  | -0.783843 |  |
| 34               | 6                | 0              | -3.104261               | -3.053992 | -0.618223 |  |



|    |   |   |           |           |           |
|----|---|---|-----------|-----------|-----------|
| 35 | 8 | 0 | -2.533616 | -4.134238 | -0.669620 |
| 36 | 8 | 0 | -4.327222 | -2.846924 | -1.140132 |
| 37 | 6 | 0 | -4.951512 | -3.979988 | -1.785566 |
| 38 | 1 | 0 | -5.915237 | -3.614357 | -2.139967 |
| 39 | 1 | 0 | -4.341267 | -4.324659 | -2.624395 |
| 40 | 1 | 0 | -5.090903 | -4.795481 | -1.071118 |
| 41 | 7 | 0 | 2.337652  | -0.137821 | -2.607581 |
| 42 | 7 | 0 | 1.488052  | 0.774278  | -2.458529 |
| 43 | 6 | 0 | 2.625830  | -0.763331 | -1.302832 |
| 44 | 6 | 0 | 4.146924  | -0.772521 | -1.094425 |
| 45 | 8 | 0 | 4.810458  | -1.785157 | -1.006374 |
| 46 | 8 | 0 | 4.623675  | 0.471007  | -1.043618 |
| 47 | 6 | 0 | 6.067618  | 0.627734  | -0.860830 |
| 48 | 1 | 0 | 6.353031  | 0.102189  | 0.055254  |
| 49 | 1 | 0 | 6.569264  | 0.153411  | -1.709146 |
| 50 | 6 | 0 | 6.346224  | 2.112310  | -0.782326 |
| 51 | 1 | 0 | 5.819792  | 2.565539  | 0.063768  |
| 52 | 1 | 0 | 7.421388  | 2.268528  | -0.644819 |
| 53 | 1 | 0 | 6.037990  | 2.618462  | -1.702566 |
| 54 | 1 | 0 | 2.305197  | -1.811016 | -1.356931 |

---

## TSC Pseudo-Exo S

HF = -1489.5145255 hartrees

Zero-point correction= 0.414206 (Hartree/Particle)

Thermal correction to Gibbs Free Energy= 0.352782

Sum of electronic and zero-point Energies= -1489.100320

Sum of electronic and thermal Enthalpies= -1489.070813

Sum of electronic and thermal Free Energies= -1489.161743

Standard orientation:

| -----  |        |        |                         |           |           |  |
|--------|--------|--------|-------------------------|-----------|-----------|--|
| Center | Atomic | Atomic | Coordinates (Angstroms) |           |           |  |
| Number | Number | Type   | X                       | Y         | Z         |  |
| -----  |        |        |                         |           |           |  |
| 1      | 6      | 0      | 1.273848                | -0.513186 | 1.262641  |  |
| 2      | 6      | 0      | 2.392884                | 0.174754  | 0.774808  |  |
| 3      | 6      | 0      | 2.252720                | 1.519510  | 0.417420  |  |
| 4      | 6      | 0      | 0.994525                | 2.140455  | 0.499686  |  |
| 5      | 6      | 0      | -0.134386               | 1.400808  | 0.882084  |  |
| 6      | 6      | 0      | 0.002757                | 0.061545  | 1.257329  |  |
| 7      | 1      | 0      | 1.379483                | -1.545242 | 1.577517  |  |
| 8      | 1      | 0      | 3.104503                | 2.068214  | 0.032077  |  |
| 9      | 1      | 0      | -1.110511               | 1.873809  | 0.871135  |  |
| 10     | 6      | 0      | 3.623046                | -0.601022 | 0.459135  |  |
| 11     | 6      | 0      | 3.510627                | -1.746730 | -0.389383 |  |
| 12     | 6      | 0      | 4.889831                | -0.222811 | 0.912679  |  |
| 13     | 6      | 0      | 4.662231                | -2.475901 | -0.732290 |  |
| 14     | 6      | 0      | 6.028030                | -0.958751 | 0.566154  |  |
| 15     | 1      | 0      | 4.980461                | 0.651071  | 1.551517  |  |
| 16     | 6      | 0      | 5.913306                | -2.086337 | -0.252489 |  |
| 17     | 1      | 0      | 4.567506                | -3.339363 | -1.383296 |  |
| 18     | 1      | 0      | 7.001274                | -0.651414 | 0.937644  |  |
| 19     | 1      | 0      | 6.795913                | -2.658612 | -0.522087 |  |
| 20     | 6      | 0      | -1.161930               | -0.806099 | 1.602109  |  |
| 21     | 6      | 0      | -1.769710               | -1.649315 | 0.639845  |  |
| 22     | 6      | 0      | -1.645509               | -0.810353 | 2.918151  |  |
| 23     | 6      | 0      | -2.841863               | -2.471783 | 1.043799  |  |
| 24     | 6      | 0      | -2.701213               | -1.638227 | 3.303359  |  |
| 25     | 1      | 0      | -1.177551               | -0.153740 | 3.646040  |  |
| 26     | 6      | 0      | -3.295271               | -2.481111 | 2.360713  |  |
| 27     | 1      | 0      | -3.317342               | -3.116768 | 0.311527  |  |
| 28     | 1      | 0      | -3.054451               | -1.624900 | 4.330271  |  |
| 29     | 1      | 0      | -4.114753               | -3.134834 | 2.644113  |  |
| 30     | 6      | 0      | -1.439078               | -1.662653 | -0.802699 |  |
| 31     | 6      | 0      | -0.320790               | -1.909377 | -1.550504 |  |
| 32     | 6      | 0      | 2.219743                | -2.077551 | -0.912147 |  |
| 33     | 6      | 0      | 1.038278                | -2.085797 | -1.210996 |  |

|    |   |   |           |           |           |
|----|---|---|-----------|-----------|-----------|
| 34 | 6 | 0 | 0.795798  | 3.570813  | 0.130122  |
| 35 | 8 | 0 | -0.277601 | 4.153254  | 0.191257  |
| 36 | 8 | 0 | 1.930171  | 4.167372  | -0.279667 |
| 37 | 6 | 0 | 1.822878  | 5.556217  | -0.666487 |
| 38 | 1 | 0 | 2.828702  | 5.849599  | -0.967126 |
| 39 | 1 | 0 | 1.126693  | 5.665377  | -1.502089 |
| 40 | 1 | 0 | 1.484010  | 6.161978  | 0.178090  |
| 41 | 7 | 0 | -1.875336 | -1.621546 | -3.128114 |
| 42 | 7 | 0 | -0.661797 | -1.898818 | -2.957216 |
| 43 | 6 | 0 | -2.518627 | -1.407767 | -1.832176 |
| 44 | 1 | 0 | -3.377028 | -2.084815 | -1.747062 |
| 45 | 6 | 0 | -3.015433 | 0.044451  | -1.703870 |
| 46 | 8 | 0 | -2.547066 | 0.984202  | -2.311314 |
| 47 | 8 | 0 | -3.976064 | 0.115411  | -0.784211 |
| 48 | 6 | 0 | -4.431004 | 1.453615  | -0.399342 |
| 49 | 1 | 0 | -3.549962 | 2.057995  | -0.166112 |
| 50 | 1 | 0 | -4.944495 | 1.896791  | -1.257393 |
| 51 | 6 | 0 | -5.342394 | 1.284258  | 0.795970  |
| 52 | 1 | 0 | -4.805900 | 0.825833  | 1.632614  |
| 53 | 1 | 0 | -5.704285 | 2.268119  | 1.112851  |
| 54 | 1 | 0 | -6.207622 | 0.661611  | 0.546830  |

---

**B (BnN<sub>3</sub> pseudo-Endo)**

HF = -1508.7686577 hartrees

Zero-point correction= 0.442549 (Hartree/Particle)

Thermal correction to Gibbs Free Energy= 0.380803

Sum of electronic and zero-point Energies= -1508.326109

Sum of electronic and thermal Enthalpies= -1508.296816

Sum of electronic and thermal Free Energies= -1508.387855

Standard orientation:

| Center<br>Number | Atomic<br>Number | Atomic<br>Type | Coordinates (Angstroms) |           |           |
|------------------|------------------|----------------|-------------------------|-----------|-----------|
|                  |                  |                | X                       | Y         | Z         |
| 1                | 6                | 0              | -1.507984               | -0.039415 | -1.389417 |
| 2                | 6                | 0              | -1.936044               | -1.287358 | -0.914477 |
| 3                | 6                | 0              | -2.911473               | -1.327817 | 0.086303  |
| 4                | 6                | 0              | -3.401892               | -0.131465 | 0.637001  |
| 5                | 6                | 0              | -2.878146               | 1.103091  | 0.224462  |
| 6                | 6                | 0              | -1.916889               | 1.152687  | -0.790384 |
| 7                | 1                | 0              | -0.787720               | 0.003298  | -2.198650 |
| 8                | 1                | 0              | -3.255079               | -2.282267 | 0.468449  |
| 9                | 1                | 0              | -3.221310               | 2.014314  | 0.702799  |
| 10               | 6                | 0              | -1.200541               | -2.508878 | -1.339662 |
| 11               | 6                | 0              | 0.221025                | -2.536072 | -1.192496 |
| 12               | 6                | 0              | -1.846743               | -3.652085 | -1.818755 |
| 13               | 6                | 0              | 0.939332                | -3.691716 | -1.544552 |
| 14               | 6                | 0              | -1.121140               | -4.796296 | -2.167188 |
| 15               | 1                | 0              | -2.927390               | -3.639122 | -1.928192 |
| 16               | 6                | 0              | 0.270684                | -4.814812 | -2.032842 |
| 17               | 1                | 0              | 2.018153                | -3.701234 | -1.424149 |
| 18               | 1                | 0              | -1.643549               | -5.669994 | -2.545882 |
| 19               | 1                | 0              | 0.834550                | -5.702188 | -2.304521 |
| 20               | 6                | 0              | -1.300726               | 2.431728  | -1.255994 |
| 21               | 6                | 0              | -0.025330               | 2.870302  | -0.822804 |
| 22               | 6                | 0              | -2.009530               | 3.204760  | -2.189058 |
| 23               | 6                | 0              | 0.489912                | 4.068456  | -1.358520 |
| 24               | 6                | 0              | -1.485140               | 4.389669  | -2.706557 |
| 25               | 1                | 0              | -2.988630               | 2.860783  | -2.510343 |
| 26               | 6                | 0              | -0.222755               | 4.819617  | -2.291351 |
| 27               | 1                | 0              | 1.466065                | 4.409357  | -1.029029 |
| 28               | 1                | 0              | -2.055686               | 4.966480  | -3.428825 |
| 29               | 1                | 0              | 0.206418                | 5.735263  | -2.687752 |
| 30               | 6                | 0              | 0.798357                | 2.237153  | 0.240626  |
| 31               | 6                | 0              | 1.300820                | 0.945693  | 0.481146  |
| 32               | 6                | 0              | 0.864116                | -1.385688 | -0.637708 |
| 33               | 6                | 0              | 1.122104                | -0.310195 | -0.128603 |
| 34               | 6                | 0              | -4.441722               | -0.127477 | 1.704975  |

|    |   |   |           |           |           |
|----|---|---|-----------|-----------|-----------|
| 35 | 8 | 0 | -4.868227 | 0.882039  | 2.246896  |
| 36 | 8 | 0 | -4.874623 | -1.363568 | 2.016907  |
| 37 | 6 | 0 | -5.884580 | -1.449851 | 3.047567  |
| 38 | 1 | 0 | -6.099742 | -2.513436 | 3.151314  |
| 39 | 1 | 0 | -5.504498 | -1.042767 | 3.988166  |
| 40 | 1 | 0 | -6.783333 | -0.905217 | 2.746636  |
| 41 | 7 | 0 | 1.313017  | 3.049758  | 1.214032  |
| 42 | 7 | 0 | 2.075459  | 2.359809  | 2.023542  |
| 43 | 7 | 0 | 2.076797  | 1.090947  | 1.601184  |
| 44 | 6 | 0 | 2.867329  | 0.067560  | 2.291077  |
| 45 | 1 | 0 | 3.147762  | 0.514460  | 3.247846  |
| 46 | 1 | 0 | 2.215286  | -0.786956 | 2.485985  |
| 47 | 6 | 0 | 4.089397  | -0.353282 | 1.498095  |
| 48 | 6 | 0 | 4.338420  | -1.709068 | 1.255156  |
| 49 | 6 | 0 | 4.986513  | 0.608719  | 1.012118  |
| 50 | 6 | 0 | 5.474548  | -2.102801 | 0.539899  |
| 51 | 1 | 0 | 3.638414  | -2.456899 | 1.618802  |
| 52 | 6 | 0 | 6.117141  | 0.217346  | 0.291439  |
| 53 | 1 | 0 | 4.795339  | 1.663553  | 1.192770  |
| 54 | 6 | 0 | 6.364950  | -1.140352 | 0.054961  |
| 55 | 1 | 0 | 5.657317  | -3.157860 | 0.355660  |
| 56 | 1 | 0 | 6.804922  | 0.970099  | -0.083689 |
| 57 | 1 | 0 | 7.244523  | -1.443935 | -0.505869 |

-----

**BnN3 Pseudo-exo**

HF = -1508.7673096 hartrees

Zero-point correction= 0.442683 (Hartree/Particle)

Thermal correction to Gibbs Free Energy= 0.381461

Sum of electronic and zero-point Energies= -1508.324627

Sum of electronic and thermal Enthalpies= -1508.295375

Sum of electronic and thermal Free Energies= -1508.385848

Standard orientation:

-----

| Center<br>Number | Atomic<br>Number | Atomic<br>Type | Coordinates (Angstroms) |           |           |
|------------------|------------------|----------------|-------------------------|-----------|-----------|
|                  |                  |                | X                       | Y         | Z         |
| 1                | 6                | 0              | 1.776789                | -0.410669 | 1.242513  |
| 2                | 6                | 0              | 3.018205                | -0.318057 | 0.600146  |
| 3                | 6                | 0              | 3.411803                | 0.918159  | 0.078049  |
| 4                | 6                | 0              | 2.544191                | 2.021482  | 0.154295  |
| 5                | 6                | 0              | 1.260719                | 1.877484  | 0.704128  |
| 6                | 6                | 0              | 0.869389                | 0.650441  | 1.245554  |
| 7                | 1                | 0              | 1.477415                | -1.353924 | 1.685041  |
| 8                | 1                | 0              | 4.366127                | 1.013275  | -0.427169 |
| 9                | 1                | 0              | 0.578664                | 2.721051  | 0.694354  |
| 10               | 6                | 0              | 3.775391                | -1.570959 | 0.332491  |

-----

|    |   |   |           |           |           |
|----|---|---|-----------|-----------|-----------|
| 11 | 6 | 0 | 3.107157  | -2.650837 | -0.324888 |
| 12 | 6 | 0 | 5.127091  | -1.714526 | 0.659606  |
| 13 | 6 | 0 | 3.811272  | -3.834034 | -0.606742 |
| 14 | 6 | 0 | 5.816287  | -2.897300 | 0.371726  |
| 15 | 1 | 0 | 5.638622  | -0.893599 | 1.154107  |
| 16 | 6 | 0 | 5.156907  | -3.957490 | -0.257332 |
| 17 | 1 | 0 | 3.298103  | -4.647053 | -1.110818 |
| 18 | 1 | 0 | 6.864214  | -2.989634 | 0.641984  |
| 19 | 1 | 0 | 5.689112  | -4.877467 | -0.480461 |
| 20 | 6 | 0 | -0.494939 | 0.375684  | 1.787749  |
| 21 | 6 | 0 | -1.486171 | -0.259786 | 1.001494  |
| 22 | 6 | 0 | -0.769827 | 0.654802  | 3.133774  |
| 23 | 6 | 0 | -2.701236 | -0.631715 | 1.605305  |
| 24 | 6 | 0 | -1.990590 | 0.303058  | 3.713789  |
| 25 | 1 | 0 | -0.005538 | 1.143359  | 3.731295  |
| 26 | 6 | 0 | -2.954059 | -0.357904 | 2.949015  |
| 27 | 1 | 0 | -3.453621 | -1.138689 | 1.011433  |
| 28 | 1 | 0 | -2.178972 | 0.530645  | 4.759008  |
| 29 | 1 | 0 | -3.900362 | -0.656511 | 3.390001  |
| 30 | 6 | 0 | -1.351669 | -0.489630 | -0.459694 |
| 31 | 6 | 0 | -0.528440 | -1.270238 | -1.287338 |
| 32 | 6 | 0 | 1.745752  | -2.462917 | -0.731666 |
| 33 | 6 | 0 | 0.652031  | -1.994224 | -0.991903 |
| 34 | 6 | 0 | 2.920100  | 3.354812  | -0.396030 |
| 35 | 8 | 0 | 2.183196  | 4.330803  | -0.397651 |
| 36 | 8 | 0 | 4.169114  | 3.380468  | -0.896176 |
| 37 | 6 | 0 | 4.609623  | 4.635410  | -1.462676 |
| 38 | 1 | 0 | 5.628517  | 4.454788  | -1.805216 |
| 39 | 1 | 0 | 3.969018  | 4.919620  | -2.301647 |
| 40 | 1 | 0 | 4.594969  | 5.422189  | -0.703943 |
| 41 | 7 | 0 | -2.223182 | 0.082706  | -1.342889 |
| 42 | 7 | 0 | -1.972903 | -0.309933 | -2.608390 |
| 43 | 7 | 0 | -0.959001 | -1.125888 | -2.583799 |
| 44 | 6 | 0 | -3.293601 | 1.056939  | -1.104575 |
| 45 | 1 | 0 | -2.988476 | 1.684906  | -0.266033 |
| 46 | 1 | 0 | -3.324599 | 1.681857  | -2.001345 |
| 47 | 6 | 0 | -4.651808 | 0.433167  | -0.839589 |
| 48 | 6 | 0 | -5.073159 | -0.724355 | -1.506939 |
| 49 | 6 | 0 | -5.513081 | 1.045006  | 0.080336  |
| 50 | 6 | 0 | -6.337598 | -1.264007 | -1.252233 |
| 51 | 1 | 0 | -4.414240 | -1.210190 | -2.220425 |
| 52 | 6 | 0 | -6.780831 | 0.510991  | 0.328967  |
| 53 | 1 | 0 | -5.185976 | 1.934247  | 0.613344  |
| 54 | 6 | 0 | -7.195673 | -0.648169 | -0.334897 |
| 55 | 1 | 0 | -6.651113 | -2.165050 | -1.772125 |
| 56 | 1 | 0 | -7.437480 | 0.993551  | 1.047608  |
| 57 | 1 | 0 | -8.177402 | -1.069431 | -0.137457 |

-----

**D**

HF = -1864.095677 hartrees

Zero-point correction= 0.495567 (Hartree/Particle)  
Thermal correction to Gibbs Free Energy= 0.428617  
Sum of electronic and zero-point Energies= -1863.600110  
Sum of electronic and thermal Enthalpies= -1863.565360  
Sum of electronic and thermal Free Energies= -1863.667060

Standard orientation:

| Center<br>Number | Atomic<br>Number | Atomic<br>Type | Coordinates (Angstroms) |           |           |
|------------------|------------------|----------------|-------------------------|-----------|-----------|
|                  |                  |                | X                       | Y         | Z         |
| 1                | 6                | 0              | 0.925522                | -1.821887 | -1.553779 |
| 2                | 6                | 0              | 2.122450                | -1.936848 | -0.836212 |
| 3                | 6                | 0              | 2.069318                | -2.353909 | 0.497176  |
| 4                | 6                | 0              | 0.825208                | -2.591613 | 1.107243  |
| 5                | 6                | 0              | -0.365567               | -2.343243 | 0.407250  |
| 6                | 6                | 0              | -0.317573               | -1.943697 | -0.930104 |
| 7                | 1                | 0              | 0.959153                | -1.507169 | -2.591144 |
| 8                | 1                | 0              | 2.981452                | -2.432905 | 1.077457  |
| 9                | 1                | 0              | -1.314458               | -2.441807 | 0.922776  |
| 10               | 6                | 0              | 3.351618                | -1.351834 | -1.439371 |
| 11               | 6                | 0              | 3.308944                | 0.019407  | -1.848249 |
| 12               | 6                | 0              | 4.548213                | -2.059168 | -1.577926 |
| 13               | 6                | 0              | 4.455921                | 0.616693  | -2.397468 |
| 14               | 6                | 0              | 5.682990                | -1.451659 | -2.127310 |
| 15               | 1                | 0              | 4.586281                | -3.097406 | -1.260652 |
| 16               | 6                | 0              | 5.634661                | -0.117154 | -2.540926 |
| 17               | 1                | 0              | 4.417530                | 1.659472  | -2.696772 |
| 18               | 1                | 0              | 6.601058                | -2.022273 | -2.233366 |
| 19               | 1                | 0              | 6.514237                | 0.354892  | -2.968470 |
| 20               | 6                | 0              | -1.503947               | -1.480571 | -1.710203 |
| 21               | 6                | 0              | -1.942615               | -0.138209 | -1.616927 |
| 22               | 6                | 0              | -2.119576               | -2.339303 | -2.631584 |
| 23               | 6                | 0              | -2.978296               | 0.300288  | -2.461057 |
| 24               | 6                | 0              | -3.155202               | -1.893511 | -3.454957 |
| 25               | 1                | 0              | -1.772890               | -3.366497 | -2.701174 |
| 26               | 6                | 0              | -3.577473               | -0.563794 | -3.376930 |
| 27               | 1                | 0              | -3.318256               | 1.328062  | -2.387009 |
| 28               | 1                | 0              | -3.621822               | -2.578063 | -4.157473 |
| 29               | 1                | 0              | -4.373208               | -0.199659 | -4.020123 |
| 30               | 6                | 0              | -1.413262               | 0.818634  | -0.604166 |
| 31               | 6                | 0              | -0.176999               | 1.371357  | -0.473593 |
| 32               | 6                | 0              | 2.108583                | 0.760802  | -1.598247 |
| 33               | 6                | 0              | 1.008888                | 1.094270  | -1.189435 |



|    |   |   |           |           |           |
|----|---|---|-----------|-----------|-----------|
| 34 | 6 | 0 | 0.716250  | -3.022087 | 2.529591  |
| 35 | 8 | 0 | -0.342790 | -3.210831 | 3.111471  |
| 36 | 8 | 0 | 1.914503  | -3.187259 | 3.119468  |
| 37 | 6 | 0 | 1.897551  | -3.586814 | 4.508373  |
| 38 | 1 | 0 | 2.945425  | -3.660463 | 4.799469  |
| 39 | 1 | 0 | 1.384503  | -2.835129 | 5.113835  |
| 40 | 1 | 0 | 1.400370  | -4.553890 | 4.621041  |
| 41 | 6 | 0 | -0.079022 | 2.301024  | 0.727757  |
| 42 | 6 | 0 | -2.342302 | 1.302135  | 0.496798  |
| 43 | 6 | 0 | -3.747746 | 0.750008  | 0.530691  |
| 44 | 6 | 0 | -3.980995 | -0.514992 | 1.080255  |
| 45 | 6 | 0 | -5.277441 | -1.027333 | 1.045093  |
| 46 | 1 | 0 | -3.167419 | -1.083400 | 1.516240  |
| 47 | 6 | 0 | -5.955921 | 0.996989  | -0.045010 |
| 48 | 6 | 0 | -6.289822 | -0.257025 | 0.471131  |
| 49 | 1 | 0 | -5.489641 | -2.009244 | 1.457258  |
| 50 | 1 | 0 | -6.716253 | 1.626984  | -0.500779 |
| 51 | 1 | 0 | -7.313377 | -0.614366 | 0.420518  |
| 52 | 6 | 0 | 1.259573  | 2.945694  | 0.980275  |
| 53 | 6 | 0 | 1.518304  | 4.266575  | 0.606650  |
| 54 | 6 | 0 | 2.804395  | 4.771266  | 0.811606  |
| 55 | 1 | 0 | 0.739677  | 4.877333  | 0.164809  |
| 56 | 6 | 0 | 3.410864  | 2.636324  | 1.720060  |
| 57 | 6 | 0 | 3.772728  | 3.942648  | 1.377935  |
| 58 | 1 | 0 | 3.042037  | 5.792807  | 0.530261  |
| 59 | 1 | 0 | 4.137173  | 1.958648  | 2.162562  |
| 60 | 1 | 0 | 4.785478  | 4.292265  | 1.551653  |
| 61 | 7 | 0 | -1.619631 | 0.958024  | 1.827443  |
| 62 | 7 | 0 | -0.510068 | 1.451541  | 1.939766  |
| 63 | 7 | 0 | -2.316759 | 2.809469  | 0.482604  |
| 64 | 7 | 0 | -1.191600 | 3.301440  | 0.594917  |
| 65 | 7 | 0 | -4.711788 | 1.496524  | -0.024419 |
| 66 | 7 | 0 | 2.182693  | 2.140111  | 1.526113  |

---

**1,4-diphenyl-1,3-butadiyne (A) and 3,5-TPDY 5 (B)**

HF = -1050.9990446 hartrees

Zero-point correction= 0.340369 (Hartree/Particle)

Thermal correction to Gibbs Free Energy= 0.285981

Sum of electronic and zero-point Energies= -1050.658676

Sum of electronic and thermal Enthalpies= -1050.636987

Sum of electronic and thermal Free Energies= -1050.713064

Standard orientation:

| -----  |        |        |                         |           |           |  |
|--------|--------|--------|-------------------------|-----------|-----------|--|
| Center | Atomic | Atomic | Coordinates (Angstroms) |           |           |  |
| Number | Number | Type   | X                       | Y         | Z         |  |
| -----  |        |        |                         |           |           |  |
| 1      | 6      | 0      | -0.605460               | 3.265950  | -0.873722 |  |
| 2      | 6      | 0      | -0.528644               | 1.893173  | -1.112264 |  |
| 3      | 6      | 0      | 0.525378                | 1.135671  | -0.568470 |  |
| 4      | 6      | 0      | 1.493979                | 1.777577  | 0.223343  |  |
| 5      | 6      | 0      | 1.412834                | 3.151722  | 0.456662  |  |
| 6      | 6      | 0      | 0.365381                | 3.899765  | -0.090453 |  |
| 7      | 1      | 0      | -1.421013               | 3.840283  | -1.303616 |  |
| 8      | 1      | 0      | -1.278287               | 1.405916  | -1.727260 |  |
| 9      | 1      | 0      | 2.295812                | 1.202788  | 0.672810  |  |
| 10     | 1      | 0      | 2.165361                | 3.634649  | 1.073322  |  |
| 11     | 1      | 0      | 0.304387                | 4.968477  | 0.094171  |  |
| 12     | 6      | 0      | 0.567020                | -0.310990 | -0.817683 |  |
| 13     | 6      | 0      | -0.453635               | -1.268319 | -0.766441 |  |
| 14     | 6      | 0      | -1.810075               | -1.084806 | -0.415846 |  |
| 15     | 6      | 0      | -2.970532               | -0.885218 | -0.108146 |  |
| 16     | 6      | 0      | -4.324264               | -0.616887 | 0.250660  |  |
| 17     | 6      | 0      | -5.278996               | -1.654695 | 0.293272  |  |
| 18     | 6      | 0      | -4.721680               | 0.700421  | 0.566203  |  |
| 19     | 6      | 0      | -6.599944               | -1.375436 | 0.643539  |  |
| 20     | 1      | 0      | -4.976650               | -2.668991 | 0.051647  |  |
| 21     | 6      | 0      | -6.045319               | 0.967269  | 0.914831  |  |
| 22     | 1      | 0      | -3.988034               | 1.500367  | 0.536275  |  |
| 23     | 6      | 0      | -6.987999               | -0.066991 | 0.954876  |  |
| 24     | 1      | 0      | -7.327809               | -2.181246 | 0.673937  |  |
| 25     | 1      | 0      | -6.341376               | 1.984141  | 1.156441  |  |
| 26     | 1      | 0      | -8.017863               | 0.145159  | 1.227307  |  |
| 27     | 7      | 0      | 1.348422                | -2.337526 | -1.356368 |  |
| 28     | 7      | 0      | 1.660957                | -1.032022 | -1.188613 |  |
| 29     | 7      | 0      | 0.078945                | -2.487815 | -1.100320 |  |
| 30     | 6      | 0      | 3.032208                | -0.591481 | -1.443082 |  |
| 31     | 1      | 0      | 2.983077                | 0.416290  | -1.860943 |  |
| 32     | 1      | 0      | 3.421615                | -1.258998 | -2.216856 |  |
| 33     | 6      | 0      | 3.927784                | -0.617273 | -0.216416 |  |
| 34     | 6      | 0      | 3.719910                | -1.514754 | 0.838270  |  |

|    |   |   |          |           |           |
|----|---|---|----------|-----------|-----------|
| 35 | 6 | 0 | 5.009138 | 0.272761  | -0.155087 |
| 36 | 6 | 0 | 4.581570 | -1.519236 | 1.940238  |
| 37 | 1 | 0 | 2.885116 | -2.208285 | 0.807480  |
| 38 | 6 | 0 | 5.874377 | 0.263350  | 0.942169  |
| 39 | 1 | 0 | 5.167772 | 0.982045  | -0.964072 |
| 40 | 6 | 0 | 5.661486 | -0.632807 | 1.995467  |
| 41 | 1 | 0 | 4.406715 | -2.217126 | 2.754326  |
| 42 | 1 | 0 | 6.706995 | 0.960485  | 0.977914  |
| 43 | 1 | 0 | 6.328810 | -0.637020 | 2.852702  |

---

## X-RAY CRYSTALLOGRAPHY

### 3,5-TPDY

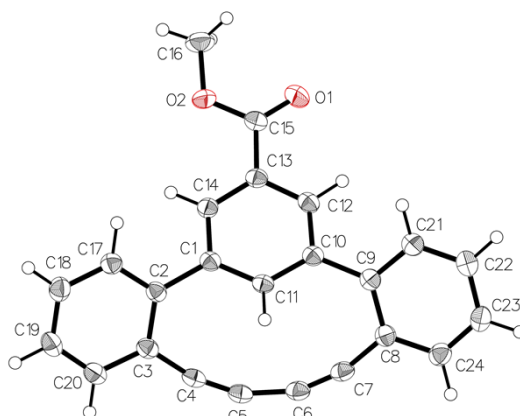

The data for **3,5-TPDY** crystallised from DCM/Et<sub>2</sub>O, were collected from a shock-cooled single crystal at 150 K on a Bruker Venture Metaljet k-geometry diffractometer with a Metal Jet using Helios MX Mirror Optics as monochromator and a Bruker CMOS Photon III detector. The diffractometer was equipped with an Oxford Cryostream 700 low temperature device and used Ga  $K_{\alpha}$  radiation ( $\lambda = 1.34139 \text{ \AA}$ ). All data were integrated with *SAINT* (2020) and a multi-scan absorption correction using *SADABS* 2016/2 was applied.<sup>6,7</sup> The structure was solved by dual methods with *XT* and refined by full-matrix least-squares methods against  $F^2$  using *XL*.<sup>8,9</sup> Structure solution and refinement cycles were performed within the graphical user interface of *OLEX2*. All non-hydrogen atoms were refined with anisotropic displacement parameters. The hydrogen atoms were located from difference Fourier map and refined isotropically.<sup>10</sup> This report and the CIF file were generated using *FinalCif*.<sup>11</sup>

Table S5. Crystal data and structure refinement for 3,5-TPDY

|                      |                                                |
|----------------------|------------------------------------------------|
| Empirical formula    | C <sub>24</sub> H <sub>14</sub> O <sub>2</sub> |
| Formula weight       | 334.35                                         |
| Temperature [K]      | 150                                            |
| Crystal system       | monoclinic                                     |
| Space group (number) | $P2_1/c$ (14)                                  |
| $a$ [Å]              | 3.8764(2)                                      |
| $b$ [Å]              | 38.1644(16)                                    |
| $c$ [Å]              | 10.9214(6)                                     |
| $\alpha$ [°]         | 90                                             |
| $\beta$ [°]          | 99.461(2)                                      |
| $\gamma$ [°]         | 90                                             |

<sup>6</sup> Bruker, *SAINT*, (2020), Bruker AXS Inc., Madison, Wisconsin, USA.

<sup>7</sup> L. Krause, R. Herbst-Irmer, G. M. Sheldrick, D. Stalke, *J. Appl. Cryst.* 2015, 48, 3–10, doi:10.1107/S1600576714022985.

<sup>8</sup> G. M. Sheldrick, *Acta Cryst.* 2015, A71, 3–8, doi:10.1107/S2053273314026370.

<sup>9</sup> G. M. Sheldrick, *Acta Cryst.* 2015, C71, 3–8, doi:10.1107/S2053229614024218.

<sup>10</sup> O. V. Dolomanov, L. J. Bourhis, R. J. Gildea, J. A. K. Howard & H. Puschmann, *J. Appl. Cryst.* 2009, 42, 339–341,

doi:10.1107/S0021889808042726

<sup>11</sup> D. Kratzert, *FinalCif*, V84, <https://www.xs3.uni-freiburg.de/research/finalcif>.

|                                                        |                                                                                |
|--------------------------------------------------------|--------------------------------------------------------------------------------|
| Volume [Å <sup>3</sup> ]                               | 1593.74(14)                                                                    |
| <i>Z</i>                                               | 4                                                                              |
| $\rho_{\text{calc}}$ [gcm <sup>-3</sup> ]              | 1.393                                                                          |
| $\mu$ [mm <sup>-1</sup> ]                              | 0.443                                                                          |
| <i>F</i> (000)                                         | 696                                                                            |
| Crystal size [mm <sup>3</sup> ]                        | 0.02×0.02×0.3                                                                  |
| Crystal colour                                         | clear light colourless                                                         |
| Crystal shape                                          | Needle                                                                         |
| Radiation                                              | Ga <i>K</i> <sub>α</sub> (λ=1.34139 Å)                                         |
| 2θ range [°]                                           | 4.03 to 113.91 (0.80 Å)                                                        |
| Index ranges                                           | -4 ≤ <i>h</i> ≤ 4<br>-45 ≤ <i>k</i> ≤ 47<br>-13 ≤ <i>l</i> ≤ 13                |
| Reflections collected                                  | 14884                                                                          |
| Independent reflections                                | 3171<br><i>R</i> <sub>int</sub> = 0.0525<br><i>R</i> <sub>sigma</sub> = 0.0457 |
| Completeness to<br>θ = 53.594°                         | 100.0 %                                                                        |
| Data / Restraints /<br>Parameters                      | 3171 / 0 / 292                                                                 |
| Goodness-of-fit on <i>F</i> <sup>2</sup>               | 1.054                                                                          |
| Final <i>R</i> indexes<br>[ <i>I</i> ≥ 2σ( <i>I</i> )] | <i>R</i> <sub>1</sub> = 0.0452<br>w <i>R</i> <sub>2</sub> = 0.1017             |
| Final <i>R</i> indexes<br>[all data]                   | <i>R</i> <sub>1</sub> = 0.0737<br>w <i>R</i> <sub>2</sub> = 0.1134             |
| Largest peak/hole [eÅ <sup>-3</sup> ]                  | 0.25/-0.18                                                                     |
| Extinction coefficient                                 | 0.0034(5)                                                                      |

Table S6. Atomic coordinates and *U*<sub>eq</sub> [Å<sup>2</sup>] for 3,5-TPDY

| Atom | <i>x</i>   | <i>y</i>   | <i>z</i>    | <i>U</i> <sub>eq</sub> |
|------|------------|------------|-------------|------------------------|
| O1   | -0.0166(4) | 0.72812(3) | 0.62060(13) | 0.0414(4)              |
| O2   | 0.1030(4)  | 0.69897(3) | 0.80075(11) | 0.0342(4)              |
| C1   | 0.4569(5)  | 0.61153(4) | 0.63393(16) | 0.0239(4)              |
| C2   | 0.5315(5)  | 0.57862(4) | 0.70878(16) | 0.0242(4)              |
| C3   | 0.4162(5)  | 0.54509(4) | 0.66197(17) | 0.0262(4)              |
| C4   | 0.2508(5)  | 0.54262(4) | 0.53539(18) | 0.0278(4)              |
| C5   | 0.1553(5)  | 0.54790(4) | 0.42597(18) | 0.0279(4)              |
| C6   | 0.1468(5)  | 0.56668(5) | 0.31805(17) | 0.0287(4)              |
| C7   | 0.2256(5)  | 0.59050(5) | 0.25602(17) | 0.0282(4)              |
| C8   | 0.3617(5)  | 0.62283(5) | 0.21693(16) | 0.0261(4)              |
| C9   | 0.4584(5)  | 0.64908(5) | 0.30824(16) | 0.0253(4)              |
| C10  | 0.4211(5)  | 0.64508(4) | 0.44125(16) | 0.0244(4)              |
| C11  | 0.5165(5)  | 0.61480(4) | 0.51158(16) | 0.0225(4)              |
| H11  | 0.630(5)   | 0.5956(5)  | 0.4759(16)  | 0.022(5)               |
| C12  | 0.2838(5)  | 0.67308(5) | 0.49973(17) | 0.0257(4)              |
| H12  | 0.215(5)   | 0.6949(5)  | 0.4551(17)  | 0.031(5)               |
| C13  | 0.2381(5)  | 0.67109(4) | 0.62301(17) | 0.0253(4)              |
| C14  | 0.3186(5)  | 0.64009(5) | 0.68907(17) | 0.0252(4)              |
| H14  | 0.276(5)   | 0.6377(4)  | 0.7740(17)  | 0.019(4)               |
| C15  | 0.0928(5)  | 0.70227(5) | 0.67809(17) | 0.0283(4)              |
| C16  | -0.0152(7) | 0.72892(6) | 0.8629(2)   | 0.0415(6)              |
| H16A | 0.113(7)   | 0.7501(7)  | 0.842(2)    | 0.059(7)               |
| H16B | 0.055(7)   | 0.7247(6)  | 0.951(3)    | 0.066(8)               |

|      |           |            |             |           |
|------|-----------|------------|-------------|-----------|
| H16C | -0.263(9) | 0.7338(7)  | 0.835(2)    | 0.071(9)  |
| C17  | 0.6996(5) | 0.58073(5) | 0.83099(17) | 0.0279(4) |
| H17  | 0.778(5)  | 0.6047(5)  | 0.8661(17)  | 0.031(5)  |
| C18  | 0.7591(6) | 0.55124(5) | 0.90602(19) | 0.0323(5) |
| H18  | 0.873(5)  | 0.5536(5)  | 0.9929(19)  | 0.033(5)  |
| C19  | 0.6471(5) | 0.51871(5) | 0.85939(19) | 0.0321(5) |
| H19  | 0.679(6)  | 0.4976(6)  | 0.9111(19)  | 0.041(6)  |
| C20  | 0.4750(5) | 0.51561(5) | 0.73876(18) | 0.0302(5) |
| H20  | 0.391(5)  | 0.4928(5)  | 0.7053(17)  | 0.026(5)  |
| C21  | 0.5814(5) | 0.68089(5) | 0.26850(18) | 0.0289(4) |
| H21  | 0.646(5)  | 0.6993(5)  | 0.3325(18)  | 0.034(5)  |
| C22  | 0.6182(5) | 0.68662(5) | 0.14621(18) | 0.0326(5) |
| H22  | 0.712(6)  | 0.7098(5)  | 0.1210(18)  | 0.036(5)  |
| C23  | 0.5305(6) | 0.66033(5) | 0.05875(18) | 0.0337(5) |
| H23  | 0.562(5)  | 0.6647(5)  | -0.0282(19) | 0.032(5)  |
| C24  | 0.4019(5) | 0.62883(5) | 0.09401(18) | 0.0312(5) |
| H24  | 0.338(6)  | 0.6100(5)  | 0.0298(19)  | 0.041(6)  |

$U_{\text{eq}}$  is defined as 1/3 of the trace of the orthogonalized  $U_{ij}$  tensor.

Table S7 Bond lengths and angles for 3,5-TPDY

| Atom–Atom | Length [Å] | Atom–Atom–Atom | Angle [°]  |
|-----------|------------|----------------|------------|
| O1–C15    | 1.208(2)   | C21–C9–C10     | 118.91(16) |
| O2–C15    | 1.340(2)   | C11–C10–C9     | 123.94(16) |
| O2–C16    | 1.442(2)   | C12–C10–C9     | 118.26(16) |
| C1–C2     | 1.501(2)   | C12–C10–C11    | 117.81(16) |
| C1–C11    | 1.398(2)   | C1–C11–C10     | 121.75(16) |
| C1–C14    | 1.394(2)   | C1–C11–H11     | 118.3(10)  |
| C2–C3     | 1.422(2)   | C10–C11–H11    | 120.0(10)  |
| C2–C17    | 1.388(3)   | C10–C12–H12    | 121.2(11)  |
| C3–C4     | 1.428(3)   | C13–C12–C10    | 121.43(17) |
| C3–C20    | 1.400(3)   | C13–C12–H12    | 117.4(11)  |
| C4–C5     | 1.208(3)   | C12–C13–C14    | 119.65(17) |
| C5–C6     | 1.375(3)   | C12–C13–C15    | 117.78(16) |
| C6–C7     | 1.203(3)   | C14–C13–C15    | 122.54(16) |
| C7–C8     | 1.434(3)   | C1–C14–H14     | 118.4(10)  |
| C8–C9     | 1.419(2)   | C13–C14–C1     | 120.60(17) |
| C8–C24    | 1.396(3)   | C13–C14–H14    | 121.0(10)  |
| C9–C10    | 1.491(2)   | O1–C15–O2      | 123.14(17) |
| C9–C21    | 1.399(3)   | O1–C15–C13     | 124.60(17) |
| C10–C11   | 1.403(2)   | O2–C15–C13     | 112.25(15) |
| C10–C12   | 1.394(2)   | O2–C16–H16A    | 109.2(15)  |
| C11–H11   | 0.970(18)  | O2–C16–H16B    | 106.0(16)  |
| C12–H12   | 0.98(2)    | O2–C16–H16C    | 112.2(16)  |
| C12–C13   | 1.389(3)   | H16A–C16–H16B  | 107(2)     |
| C13–C14   | 1.394(2)   | H16A–C16–H16C  | 106(2)     |
| C13–C15   | 1.486(2)   | H16B–C16–H16C  | 116(2)     |
| C14–H14   | 0.972(18)  | C2–C17–H17     | 118.5(11)  |
| C16–H16A  | 0.99(3)    | C2–C17–C18     | 121.78(18) |
| C16–H16B  | 0.97(3)    | C18–C17–H17    | 119.7(11)  |
| C16–H16C  | 0.98(3)    | C17–C18–H18    | 120.1(11)  |
| C17–H17   | 1.02(2)    | C19–C18–C17    | 119.86(19) |
| C17–C18   | 1.389(3)   | C19–C18–H18    | 120.0(11)  |
| C18–H18   | 0.98(2)    | C18–C19–H19    | 121.5(12)  |
| C18–C19   | 1.384(3)   | C20–C19–C18    | 120.08(18) |
| C19–H19   | 0.98(2)    | C20–C19–H19    | 118.3(12)  |
| C19–C20   | 1.380(3)   | C3–C20–H20     | 118.7(11)  |
| C20–H20   | 0.978(19)  | C19–C20–C3     | 120.56(18) |
| C21–H21   | 0.99(2)    | C19–C20–H20    | 120.8(11)  |
| C21–C22   | 1.384(3)   | C9–C21–H21     | 117.1(11)  |
| C22–H22   | 1.01(2)    | C22–C21–C9     | 122.07(18) |
| C22–C23   | 1.388(3)   | C22–C21–H21    | 120.9(11)  |
| C23–H23   | 0.99(2)    | C21–C22–H22    | 120.0(11)  |

|                       |                  |             |            |
|-----------------------|------------------|-------------|------------|
| C23–C24               | 1.380(3)         | C21–C22–C23 | 119.83(18) |
| C24–H24               | 1.01(2)          | C23–C22–H22 | 120.2(11)  |
|                       |                  | C22–C23–H23 | 118.9(11)  |
| <b>Atom–Atom–Atom</b> | <b>Angle [°]</b> | C24–C23–C22 | 119.75(18) |
| C15–O2–C16            | 115.89(16)       | C24–C23–H23 | 121.3(11)  |
| C11–C1–C2             | 123.21(16)       | C8–C24–H24  | 120.0(12)  |
| C14–C1–C2             | 118.18(16)       | C23–C24–C8  | 120.91(18) |
| C14–C1–C11            | 118.60(16)       | C23–C24–H24 | 119.1(12)  |
| C3–C2–C1              | 122.43(16)       |             |            |
| C17–C2–C1             | 119.55(16)       |             |            |
| C17–C2–C3             | 117.89(16)       |             |            |
| C2–C3–C4              | 118.15(16)       |             |            |
| C20–C3–C2             | 119.82(17)       |             |            |
| C20–C3–C4             | 122.00(17)       |             |            |
| C5–C4–C3              | 164.18(19)       |             |            |
| C4–C5–C6              | 153.46(19)       |             |            |
| C7–C6–C5              | 154.71(19)       |             |            |
| C6–C7–C8              | 163.29(19)       |             |            |
| C9–C8–C7              | 117.73(16)       |             |            |
| C24–C8–C7             | 122.14(17)       |             |            |
| C24–C8–C9             | 120.13(17)       |             |            |
| C8–C9–C10             | 123.76(16)       |             |            |
| C21–C9–C8             | 117.28(17)       |             |            |

Table S8. Torsion angles for 3,5-TPDY

| <b>Atom–Atom–Atom–Atom</b> | <b>Torsion Angle [°]</b> |
|----------------------------|--------------------------|
| C1–C2–C3–C4                | 5.6(3)                   |
| C1–C2–C3–C20               | –176.09(17)              |
| C1–C2–C17–C18              | 176.77(17)               |
| C2–C1–C11–C10              | 175.43(17)               |
| C2–C1–C14–C13              | –178.76(17)              |
| C2–C3–C4–C5                | 23.0(8)                  |
| C2–C3–C20–C19              | –0.6(3)                  |
| C2–C17–C18–C19             | –0.5(3)                  |
| C3–C2–C17–C18              | 0.7(3)                   |
| C3–C4–C5–C6                | –0.3(11)                 |
| C4–C3–C20–C19              | 177.61(18)               |
| C4–C5–C6–C7                | 0.4(8)                   |
| C5–C6–C7–C8                | –10.9(11)                |
| C6–C7–C8–C9                | –14.9(8)                 |
| C6–C7–C8–C24               | 164.8(6)                 |
| C7–C8–C9–C10               | –1.0(3)                  |
| C7–C8–C9–C21               | –178.21(17)              |
| C7–C8–C24–C23              | 179.38(19)               |



|                 |             |
|-----------------|-------------|
| C8-C9-C10-C11   | 44.6(3)     |
| C8-C9-C10-C12   | -135.56(19) |
| C8-C9-C21-C22   | -1.8(3)     |
| C9-C8-C24-C23   | -0.9(3)     |
| C9-C10-C11-C1   | -176.08(17) |
| C9-C10-C12-C13  | 179.29(17)  |
| C9-C21-C22-C23  | 0.2(3)      |
| C10-C9-C21-C22  | -179.13(18) |
| C10-C12-C13-C14 | -2.4(3)     |
| C10-C12-C13-C15 | 179.52(17)  |
| C11-C1-C2-C3    | -48.8(3)    |
| C11-C1-C2-C17   | 135.40(19)  |
| C11-C1-C14-C13  | 0.7(3)      |
| C11-C10-C12-C13 | -0.8(3)     |
| C12-C10-C11-C1  | 4.0(3)      |
| C12-C13-C14-C1  | 2.4(3)      |
| C12-C13-C15-O1  | 6.7(3)      |
| C12-C13-C15-O2  | -171.90(16) |
| C14-C1-C2-C3    | 130.66(19)  |
| C14-C1-C2-C17   | -45.2(2)    |
| C14-C1-C11-C10  | -4.0(3)     |
| C14-C13-C15-O1  | -171.34(19) |
| C14-C13-C15-O2  | 10.0(3)     |
| C15-C13-C14-C1  | -179.54(17) |
| C16-O2-C15-O1   | -2.0(3)     |
| C16-O2-C15-C13  | 176.67(18)  |
| C17-C2-C3-C4    | -178.47(17) |
| C17-C2-C3-C20   | -0.2(3)     |
| C17-C18-C19-C20 | -0.3(3)     |
| C18-C19-C20-C3  | 0.9(3)      |
| C20-C3-C4-C5    | -155.2(7)   |
| C21-C9-C10-C11  | -138.25(19) |
| C21-C9-C10-C12  | 41.6(3)     |
| C21-C22-C23-C24 | 1.0(3)      |
| C22-C23-C24-C8  | -0.7(3)     |
| C24-C8-C9-C10   | 179.32(18)  |
| C24-C8-C9-C21   | 2.1(3)      |

## 3,5-Triazole-Reg2

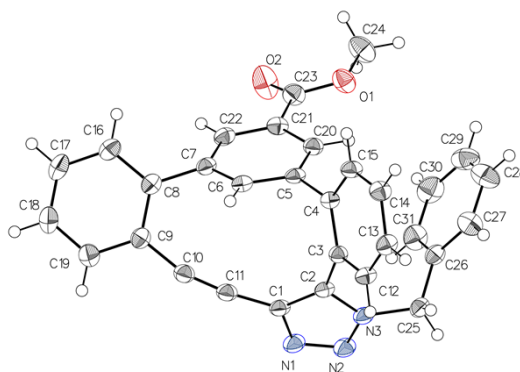

The data for 3,5-Triazole-Reg2, crystallised from DCM/Et<sub>2</sub>O, were collected from a shock-cooled single crystal at 150 K on a Bruker Venture Metaljet k-geometry diffractometer with a Metal Jet using Helios MX Mirror Optics as monochromator and a Bruker CMOS Photon III detector. The diffractometer was equipped with an Oxford Cryostream 700 low temperature device and used Ga  $K_{\alpha}$  radiation ( $\lambda = 1.34139 \text{ \AA}$ ). All data were integrated with *SAINT* (2020) and a multi-scan absorption correction using *SADABS* 2016/2 was applied.<sup>12,13</sup> The structure was solved by dual methods with *XT* and refined by full-matrix least-squares methods against  $F^2$  using *XL*.<sup>14,15</sup> Structure solution and refinement cycles were performed within the graphical user interface of *OLEX2*. All non-hydrogen atoms were refined with anisotropic displacement parameters. The hydrogen atoms were located from difference Fourier map and refined isotropically.<sup>16</sup> This report and the CIF file were generated using FinalCif.<sup>17</sup>

Table S9. Crystal data and structure refinement for 3,5-Triazole-Reg2

|                                           |                                                               |
|-------------------------------------------|---------------------------------------------------------------|
| Empirical formula                         | C <sub>31</sub> H <sub>21</sub> N <sub>3</sub> O <sub>2</sub> |
| Formula weight                            | 467.51                                                        |
| Temperature [K]                           | 150                                                           |
| Crystal system                            | triclinic                                                     |
| Space group (number)                      | $P\bar{1}$ (2)                                                |
| $a$ [Å]                                   | 9.1237(13)                                                    |
| $b$ [Å]                                   | 10.4155(15)                                                   |
| $c$ [Å]                                   | 12.6877(19)                                                   |
| $\alpha$ [°]                              | 100.575(6)                                                    |
| $\beta$ [°]                               | 91.287(6)                                                     |
| $\gamma$ [°]                              | 93.604(6)                                                     |
| Volume [Å <sup>3</sup> ]                  | 1182.2(3)                                                     |
| $Z$                                       | 2                                                             |
| $\rho_{\text{calc}}$ [gcm <sup>-3</sup> ] | 1.313                                                         |
| $\mu$ [mm <sup>-1</sup> ]                 | 0.423                                                         |

<sup>12</sup> Bruker, SAINT, (2020), Bruker AXS Inc., Madison, Wisconsin, USA.

<sup>13</sup> L. Krause, R. Herbst-Irmer, G. M. Sheldrick, D. Stalke, *J. Appl. Cryst.* 2015, 48, 3–10, doi:10.1107/S1600576714022985.

<sup>14</sup> G. M. Sheldrick, *Acta Cryst.* 2015, A71, 3–8, doi:10.1107/S2053273314026370.

<sup>15</sup> G. M. Sheldrick, *Acta Cryst.* 2015, C71, 3–8, doi:10.1107/S2053229614024218.

<sup>16</sup> O. V. Dolomanov, L. J. Bourhis, R. J. Gildea, J. A. K. Howard & H. Puschmann, *J. Appl. Cryst.* 2009, 42, 339–341,

doi:10.1107/S0021889808042726

<sup>17</sup> D. Kratzert, FinalCif, V84, <https://www.xs3.uni-freiburg.de/research/finalcif>.

|                                           |                                                                  |
|-------------------------------------------|------------------------------------------------------------------|
| $F(000)$                                  | 488                                                              |
| Crystal size [mm <sup>3</sup> ]           | 0.11×0.15×0.16                                                   |
| Crystal colour                            | clear light colourless                                           |
| Crystal shape                             | Block                                                            |
| Radiation                                 | Ga $K_{\alpha}$ ( $\lambda=1.34139$ Å)                           |
| 2 $\theta$ range [°]                      | 6.17 to 114.03<br>(0.80 Å)                                       |
| Index ranges                              | -11 ≤ h ≤ 11<br>-12 ≤ k ≤ 12<br>-15 ≤ l ≤ 15                     |
| Reflections collected                     | 45392                                                            |
| Independent reflections                   | 4777<br>$R_{\text{int}} = 0.0292$<br>$R_{\text{sigma}} = 0.0169$ |
| Completeness to $\theta = 53.594^{\circ}$ | 99.1 %                                                           |
| Data / Restraints / Parameters            | 4777 / 0 / 327                                                   |
| Goodness-of-fit on $F^2$                  | 1.032                                                            |
| Final $R$ indexes [ $I \geq 2\sigma(I)$ ] | $R_1 = 0.0350$<br>$wR_2 = 0.0907$                                |
| Final $R$ indexes [all data]              | $R_1 = 0.0385$<br>$wR_2 = 0.0930$                                |
| Largest peak/hole [eÅ <sup>-3</sup> ]     | 0.25/-0.18                                                       |
| Extinction coefficient                    | 0.0117(12)                                                       |

Table S10. Atomic coordinates and  $U_{\text{eq}}$  [Å<sup>2</sup>] for 3,5-Triazole-Reg2

| Atom | $x$         | $y$          | $z$        | $U_{\text{eq}}$ |
|------|-------------|--------------|------------|-----------------|
| O1   | 0.15694(10) | 0.53286(8)   | 0.95431(6) | 0.0365(2)       |
| C1   | 0.48365(11) | 0.11700(10)  | 0.60471(9) | 0.0260(2)       |
| N1   | 0.62407(10) | 0.11664(9)   | 0.64530(8) | 0.0318(2)       |
| O2   | 0.24689(14) | 0.68273(9)   | 0.86332(8) | 0.0591(3)       |
| N2   | 0.62080(10) | 0.05520(10)  | 0.72614(8) | 0.0319(2)       |
| C2   | 0.38860(11) | 0.05039(10)  | 0.66364(8) | 0.0235(2)       |
| N3   | 0.48000(9)  | 0.01395(9)   | 0.73754(7) | 0.0259(2)       |
| C3   | 0.22969(11) | 0.00773(10)  | 0.66190(8) | 0.0228(2)       |
| C4   | 0.11832(11) | 0.09576(10)  | 0.68387(8) | 0.0227(2)       |
| C5   | 0.14799(10) | 0.23858(10)  | 0.68437(8) | 0.0232(2)       |
| C6   | 0.16732(11) | 0.27584(10)  | 0.58577(9) | 0.0245(2)       |
| H6   | 0.153167    | 0.211467     | 0.522211   | 0.029           |
| C7   | 0.20701(11) | 0.40531(10)  | 0.57716(9) | 0.0255(2)       |
| C8   | 0.25406(12) | 0.43658(10)  | 0.47281(9) | 0.0269(2)       |
| C9   | 0.36228(12) | 0.36261(10)  | 0.41537(9) | 0.0276(2)       |
| C10  | 0.42259(12) | 0.26020(11)  | 0.46197(9) | 0.0281(2)       |
| C11  | 0.45392(11) | 0.18791(10)  | 0.52139(9) | 0.0273(2)       |
| C12  | 0.19244(12) | -0.12662(10) | 0.64908(9) | 0.0269(2)       |
| H12  | 0.266148    | -0.186636    | 0.631066   | 0.032           |
| C13  | 0.04983(12) | -0.17377(10) | 0.66220(9) | 0.0285(2)       |
| H13  | 0.026376    | -0.265338    | 0.653680   | 0.034           |

|      |              |              |             |           |
|------|--------------|--------------|-------------|-----------|
| C14  | -0.05859(11) | -0.08663(11) | 0.68784(9)  | 0.0288(2) |
| H14  | -0.155940    | -0.118192    | 0.698903    | 0.035     |
| C15  | -0.02423(11) | 0.04678(10)  | 0.69724(9)  | 0.0272(2) |
| H15  | -0.099397    | 0.105802     | 0.713096    | 0.033     |
| C16  | 0.20093(13)  | 0.54102(11)  | 0.43259(9)  | 0.0317(3) |
| H16  | 0.128221     | 0.590631     | 0.470283    | 0.038     |
| C17  | 0.25266(15)  | 0.57380(11)  | 0.33813(10) | 0.0371(3) |
| H17  | 0.215664     | 0.645538     | 0.311760    | 0.045     |
| C18  | 0.35832(15)  | 0.50162(12)  | 0.28249(10) | 0.0377(3) |
| H18  | 0.394084     | 0.524466     | 0.218175    | 0.045     |
| C19  | 0.41235(13)  | 0.39599(12)  | 0.32016(9)  | 0.0333(3) |
| H19  | 0.483718     | 0.346281     | 0.280904    | 0.040     |
| C20  | 0.15774(11)  | 0.33393(10)  | 0.77723(9)  | 0.0255(2) |
| H20  | 0.143731     | 0.310201     | 0.845294    | 0.031     |
| C21  | 0.18837(11)  | 0.46514(10)  | 0.76933(9)  | 0.0271(2) |
| C22  | 0.21486(11)  | 0.49996(10)  | 0.66995(9)  | 0.0271(2) |
| H22  | 0.238401     | 0.589031     | 0.665874    | 0.033     |
| C23  | 0.20122(13)  | 0.57203(11)  | 0.86499(10) | 0.0328(3) |
| C24  | 0.16333(16)  | 0.63285(14)  | 1.04978(10) | 0.0440(3) |
| H24A | 0.098735     | 0.701572     | 1.039519    | 0.066     |
| H24B | 0.264491     | 0.670770     | 1.063779    | 0.066     |
| H24C | 0.131113     | 0.594138     | 1.110899    | 0.066     |
| C25  | 0.44281(12)  | -0.04244(11) | 0.83198(9)  | 0.0280(2) |
| H25A | 0.533745     | -0.066436    | 0.865436    | 0.034     |
| H25B | 0.378098     | -0.123238    | 0.809482    | 0.034     |
| C26  | 0.36589(12)  | 0.05306(11)  | 0.91354(9)  | 0.0279(2) |
| C27  | 0.24242(13)  | 0.01146(13)  | 0.96249(10) | 0.0374(3) |
| H27  | 0.203640     | -0.076779    | 0.943186    | 0.045     |
| C28  | 0.17464(15)  | 0.09837(15)  | 1.03997(11) | 0.0464(3) |
| H28  | 0.090309     | 0.068927     | 1.073697    | 0.056     |
| C29  | 0.22922(15)  | 0.22682(14)  | 1.06797(11) | 0.0458(3) |
| H29  | 0.182487     | 0.286088     | 1.120540    | 0.055     |
| C30  | 0.35220(17)  | 0.26875(13)  | 1.01914(11) | 0.0469(3) |
| H30  | 0.390438     | 0.357165     | 1.038322    | 0.056     |
| C31  | 0.42023(15)  | 0.18247(12)  | 0.94222(11) | 0.0400(3) |
| H31  | 0.504758     | 0.212224     | 0.908874    | 0.048     |

$U_{eq}$  is defined as 1/3 of the trace of the orthogonalized  $U_{ij}$  tensor.

Table S11. Anisotropic displacement parameters ( $\text{\AA}^2$ ) for 3,5-Triazole-Reg2. The anisotropic displacement factor exponent takes the form:  $-2\pi^2[h^2(a^*)^2U_{11} + k^2(b^*)^2U_{22} + \dots + 2hka^*b^*U_{12}]$

| Atom | $U_{11}$  | $U_{22}$  | $U_{33}$  | $U_{23}$   | $U_{13}$  | $U_{12}$   |
|------|-----------|-----------|-----------|------------|-----------|------------|
| O1   | 0.0447(5) | 0.0311(4) | 0.0306(4) | -0.0013(3) | 0.0073(4) | -0.0026(4) |
| C1   | 0.0197(5) | 0.0239(5) | 0.0353(6) | 0.0066(4)  | 0.0035(4) | 0.0049(4)  |
| N1   | 0.0203(4) | 0.0329(5) | 0.0454(6) | 0.0145(4)  | 0.0028(4) | 0.0047(4)  |
| O2   | 0.0997(9) | 0.0281(5) | 0.0439(5) | -0.0028(4) | 0.0162(5) | -0.0166(5) |
| N2   | 0.0189(4) | 0.0346(5) | 0.0451(6) | 0.0144(4)  | 0.0010(4) | 0.0031(4)  |
| C2   | 0.0201(5) | 0.0210(5) | 0.0297(5) | 0.0042(4)  | 0.0014(4) | 0.0056(4)  |
| N3   | 0.0181(4) | 0.0268(4) | 0.0343(5) | 0.0088(4)  | 0.0010(3) | 0.0038(3)  |
| C3   | 0.0196(5) | 0.0233(5) | 0.0257(5) | 0.0049(4)  | 0.0013(4) | 0.0023(4)  |
| C4   | 0.0208(5) | 0.0229(5) | 0.0242(5) | 0.0034(4)  | 0.0005(4) | 0.0028(4)  |

|     |           |           |           |            |            |            |
|-----|-----------|-----------|-----------|------------|------------|------------|
| C5  | 0.0155(4) | 0.0227(5) | 0.0318(5) | 0.0050(4)  | 0.0017(4)  | 0.0040(4)  |
| C6  | 0.0202(5) | 0.0236(5) | 0.0293(5) | 0.0026(4)  | -0.0002(4) | 0.0044(4)  |
| C7  | 0.0212(5) | 0.0254(5) | 0.0309(5) | 0.0068(4)  | 0.0000(4)  | 0.0048(4)  |
| C8  | 0.0270(5) | 0.0237(5) | 0.0296(5) | 0.0050(4)  | -0.0030(4) | -0.0001(4) |
| C9  | 0.0282(5) | 0.0251(5) | 0.0294(5) | 0.0059(4)  | -0.0016(4) | 0.0000(4)  |
| C10 | 0.0243(5) | 0.0286(5) | 0.0318(6) | 0.0058(4)  | 0.0055(4)  | 0.0035(4)  |
| C11 | 0.0212(5) | 0.0269(5) | 0.0346(6) | 0.0064(4)  | 0.0061(4)  | 0.0040(4)  |
| C12 | 0.0244(5) | 0.0234(5) | 0.0331(6) | 0.0040(4)  | 0.0012(4)  | 0.0055(4)  |
| C13 | 0.0278(5) | 0.0216(5) | 0.0354(6) | 0.0048(4)  | -0.0009(4) | -0.0012(4) |
| C14 | 0.0203(5) | 0.0294(6) | 0.0362(6) | 0.0061(5)  | 0.0009(4)  | -0.0021(4) |
| C15 | 0.0198(5) | 0.0272(5) | 0.0348(6) | 0.0050(4)  | 0.0027(4)  | 0.0040(4)  |
| C16 | 0.0352(6) | 0.0251(5) | 0.0347(6) | 0.0054(5)  | -0.0035(5) | 0.0038(4)  |
| C17 | 0.0490(7) | 0.0272(6) | 0.0366(6) | 0.0113(5)  | -0.0081(5) | 0.0013(5)  |
| C18 | 0.0496(7) | 0.0348(6) | 0.0302(6) | 0.0116(5)  | 0.0001(5)  | -0.0026(5) |
| C19 | 0.0363(6) | 0.0326(6) | 0.0312(6) | 0.0066(5)  | 0.0026(5)  | 0.0003(5)  |
| C20 | 0.0213(5) | 0.0258(5) | 0.0297(5) | 0.0051(4)  | 0.0032(4)  | 0.0036(4)  |
| C21 | 0.0245(5) | 0.0241(5) | 0.0319(6) | 0.0021(4)  | 0.0028(4)  | 0.0030(4)  |
| C22 | 0.0252(5) | 0.0210(5) | 0.0355(6) | 0.0056(4)  | 0.0018(4)  | 0.0036(4)  |
| C23 | 0.0351(6) | 0.0268(6) | 0.0352(6) | 0.0025(5)  | 0.0044(5)  | 0.0003(5)  |
| C24 | 0.0483(8) | 0.0443(7) | 0.0330(7) | -0.0073(5) | 0.0060(5)  | -0.0061(6) |
| C25 | 0.0255(5) | 0.0275(5) | 0.0332(6) | 0.0107(4)  | -0.0007(4) | 0.0039(4)  |
| C26 | 0.0254(5) | 0.0295(5) | 0.0293(5) | 0.0072(4)  | -0.0048(4) | 0.0030(4)  |
| C27 | 0.0317(6) | 0.0392(7) | 0.0383(6) | 0.0013(5)  | 0.0017(5)  | -0.0038(5) |
| C28 | 0.0331(6) | 0.0602(9) | 0.0409(7) | -0.0033(6) | 0.0047(5)  | 0.0001(6)  |
| C29 | 0.0462(8) | 0.0492(8) | 0.0379(7) | -0.0064(6) | -0.0050(6) | 0.0167(6)  |
| C30 | 0.0603(9) | 0.0311(6) | 0.0460(8) | -0.0003(5) | -0.0040(6) | 0.0025(6)  |
| C31 | 0.0429(7) | 0.0332(6) | 0.0425(7) | 0.0057(5)  | 0.0013(5)  | -0.0036(5) |

Table S12. Bond lengths and angles for 3,5-Triazole-Reg2

| Atom-Atom | Length [Å] | Atom-Atom-Atom | Angle [°]  |
|-----------|------------|----------------|------------|
| O1-C23    | 1.3355(14) | C23-O1-C24     | 115.71(9)  |
| O1-C24    | 1.4428(14) | N1-C1-C2       | 108.75(9)  |
| C1-N1     | 1.3705(14) | N1-C1-C11      | 120.46(9)  |
| C1-C2     | 1.3915(15) | C2-C1-C11      | 130.57(10) |
| C1-C11    | 1.4268(15) | N2-N1-C1       | 108.79(9)  |
| N1-N2     | 1.3047(14) | N1-N2-N3       | 107.77(8)  |
| O2-C23    | 1.2051(15) | C1-C2-C3       | 138.21(10) |
| N2-N3     | 1.3482(12) | N3-C2-C1       | 103.20(9)  |
| C2-N3     | 1.3616(13) | N3-C2-C3       | 118.50(9)  |
| C2-C3     | 1.4880(14) | N2-N3-C2       | 111.48(9)  |
| N3-C25    | 1.4654(14) | N2-N3-C25      | 118.77(9)  |
| C3-C4     | 1.4096(14) | C2-N3-C25      | 128.99(9)  |
| C3-C12    | 1.3979(15) | C4-C3-C2       | 123.24(9)  |
| C4-C5     | 1.4939(14) | C12-C3-C2      | 117.38(9)  |
| C4-C15    | 1.3924(14) | C12-C3-C4      | 119.01(9)  |
| C5-C6     | 1.3879(15) | C3-C4-C5       | 121.21(9)  |
| C5-C20    | 1.3918(15) | C15-C4-C3      | 119.05(9)  |
| C6-H6     | 0.9500     | C15-C4-C5      | 119.56(9)  |

|          |            |             |            |
|----------|------------|-------------|------------|
| C6-C7    | 1.3986(15) | C6-C5-C4    | 117.05(9)  |
| C7-C8    | 1.4864(15) | C6-C5-C20   | 119.26(9)  |
| C7-C22   | 1.3873(15) | C20-C5-C4   | 123.70(9)  |
| C8-C9    | 1.4218(15) | C5-C6-H6    | 119.0      |
| C8-C16   | 1.3920(15) | C5-C6-C7    | 121.98(10) |
| C9-C10   | 1.4425(15) | C7-C6-H6    | 119.0      |
| C9-C19   | 1.3956(16) | C6-C7-C8    | 120.06(9)  |
| C10-C11  | 1.2011(16) | C22-C7-C6   | 118.21(10) |
| C12-H12  | 0.9500     | C22-C7-C8   | 121.43(10) |
| C12-C13  | 1.3862(15) | C9-C8-C7    | 119.20(9)  |
| C13-H13  | 0.9500     | C16-C8-C7   | 121.72(10) |
| C13-C14  | 1.3882(15) | C16-C8-C9   | 118.98(10) |
| C14-H14  | 0.9500     | C8-C9-C10   | 118.03(10) |
| C14-C15  | 1.3877(15) | C19-C9-C8   | 119.40(10) |
| C15-H15  | 0.9500     | C19-C9-C10  | 122.46(10) |
| C16-H16  | 0.9500     | C11-C10-C9  | 164.25(11) |
| C16-C17  | 1.3896(17) | C10-C11-C1  | 171.22(11) |
| C17-H17  | 0.9500     | C3-C12-H12  | 119.4      |
| C17-C18  | 1.3856(19) | C13-C12-C3  | 121.14(9)  |
| C18-H18  | 0.9500     | C13-C12-H12 | 119.4      |
| C18-C19  | 1.3901(17) | C12-C13-H13 | 120.1      |
| C19-H19  | 0.9500     | C12-C13-C14 | 119.72(10) |
| C20-H20  | 0.9500     | C14-C13-H13 | 120.1      |
| C20-C21  | 1.3997(15) | C13-C14-H14 | 120.1      |
| C21-C22  | 1.3965(16) | C15-C14-C13 | 119.75(10) |
| C21-C23  | 1.4858(16) | C15-C14-H14 | 120.1      |
| C22-H22  | 0.9500     | C4-C15-H15  | 119.4      |
| C24-H24A | 0.9800     | C14-C15-C4  | 121.25(9)  |
| C24-H24B | 0.9800     | C14-C15-H15 | 119.4      |
| C24-H24C | 0.9800     | C8-C16-H16  | 119.5      |
| C25-H25A | 0.9900     | C17-C16-C8  | 120.99(11) |
| C25-H25B | 0.9900     | C17-C16-H16 | 119.5      |
| C25-C26  | 1.5151(15) | C16-C17-H17 | 120.1      |
| C26-C27  | 1.3825(16) | C18-C17-C16 | 119.84(11) |
| C26-C31  | 1.3867(17) | C18-C17-H17 | 120.1      |
| C27-H27  | 0.9500     | C17-C18-H18 | 119.8      |
| C27-C28  | 1.3925(18) | C17-C18-C19 | 120.44(11) |
| C28-H28  | 0.9500     | C19-C18-H18 | 119.8      |
| C28-C29  | 1.378(2)   | C9-C19-H19  | 119.8      |
| C29-H29  | 0.9500     | C18-C19-C9  | 120.33(11) |
| C29-C30  | 1.379(2)   | C18-C19-H19 | 119.8      |
| C30-H30  | 0.9500     | C5-C20-H20  | 120.3      |
| C30-C31  | 1.3859(19) | C5-C20-C21  | 119.34(10) |
| C31-H31  | 0.9500     | C21-C20-H20 | 120.3      |
|          |            | C20-C21-C23 | 122.31(10) |

|  |  |               |            |
|--|--|---------------|------------|
|  |  | C22–C21–C20   | 120.56(10) |
|  |  | C22–C21–C23   | 117.07(10) |
|  |  | C7–C22–C21    | 120.42(10) |
|  |  | C7–C22–H22    | 119.8      |
|  |  | C21–C22–H22   | 119.8      |
|  |  | O1–C23–C21    | 112.91(10) |
|  |  | O2–C23–O1     | 122.93(11) |
|  |  | O2–C23–C21    | 124.16(11) |
|  |  | O1–C24–H24A   | 109.5      |
|  |  | O1–C24–H24B   | 109.5      |
|  |  | O1–C24–H24C   | 109.5      |
|  |  | H24A–C24–H24B | 109.5      |
|  |  | H24A–C24–H24C | 109.5      |
|  |  | H24B–C24–H24C | 109.5      |
|  |  |               |            |
|  |  | N3–C25–H25A   | 109.4      |
|  |  | N3–C25–H25B   | 109.4      |
|  |  | N3–C25–C26    | 111.37(9)  |
|  |  | H25A–C25–H25B | 108.0      |
|  |  | C26–C25–H25A  | 109.4      |
|  |  | C26–C25–H25B  | 109.4      |
|  |  | C27–C26–C25   | 120.36(10) |
|  |  | C27–C26–C31   | 119.02(11) |
|  |  | C31–C26–C25   | 120.60(10) |
|  |  | C26–C27–H27   | 119.9      |
|  |  | C26–C27–C28   | 120.28(12) |
|  |  | C28–C27–H27   | 119.9      |
|  |  | C27–C28–H28   | 119.8      |
|  |  | C29–C28–C27   | 120.36(13) |
|  |  | C29–C28–H28   | 119.8      |
|  |  | C28–C29–H29   | 120.2      |
|  |  | C28–C29–C30   | 119.53(12) |
|  |  | C30–C29–H29   | 120.2      |
|  |  | C29–C30–H30   | 119.9      |
|  |  | C29–C30–C31   | 120.29(13) |
|  |  | C31–C30–H30   | 119.9      |
|  |  | C26–C31–H31   | 119.7      |
|  |  | C30–C31–C26   | 120.52(12) |
|  |  | C30–C31–H31   | 119.7      |

Table S13. Torsion angles for 3,5-Triazole-Reg2

| Atom–Atom–Atom–Atom | Torsion Angle [°] | Atom–Atom–Atom–Atom | Torsion Angle [°] |
|---------------------|-------------------|---------------------|-------------------|
| C1–N1–N2–N3         | 0.88(12)          | C11–C1–C2–C3        | 9.6(2)            |

|                |             |                 |             |
|----------------|-------------|-----------------|-------------|
| C1-C2-N3-N2    | 0.36(11)    | C12-C3-C4-C5    | -172.05(10) |
| C1-C2-N3-C25   | 170.10(10)  | C12-C3-C4-C15   | 3.03(15)    |
| C1-C2-C3-C4    | -67.96(17)  | C12-C13-C14-C15 | 1.76(17)    |
| C1-C2-C3-C12   | 119.09(14)  | C13-C14-C15-C4  | -1.51(17)   |
| N1-C1-C2-N3    | 0.18(11)    | C15-C4-C5-C6    | -102.93(11) |
| N1-C1-C2-C3    | -175.92(11) | C15-C4-C5-C20   | 77.42(13)   |
| N1-N2-N3-C2    | -0.79(12)   | C16-C8-C9-C10   | 176.11(10)  |
| N1-N2-N3-C25   | -171.71(9)  | C16-C8-C9-C19   | -0.17(16)   |
| N2-N3-C25-C26  | 104.40(11)  | C16-C17-C18-C19 | 0.41(19)    |
| C2-C1-N1-N2    | -0.67(12)   | C17-C18-C19-C9  | -0.94(18)   |
| C2-N3-C25-C26  | -64.71(14)  | C19-C9-C10-C11  | 168.0(4)    |
| C2-C3-C4-C5    | 15.10(15)   | C20-C5-C6-C7    | 4.78(15)    |
| C2-C3-C4-C15   | -169.82(10) | C20-C21-C22-C7  | 1.86(16)    |
| C2-C3-C12-C13  | 170.45(10)  | C20-C21-C23-O1  | -10.47(16)  |
| N3-C2-C3-C4    | 116.36(11)  | C20-C21-C23-O2  | 169.37(12)  |
| N3-C2-C3-C12   | -56.59(13)  | C22-C7-C8-C9    | 124.37(11)  |
| N3-C25-C26-C27 | 135.15(11)  | C22-C7-C8-C16   | -52.04(15)  |
| N3-C25-C26-C31 | -46.48(14)  | C22-C21-C23-O1  | 172.36(10)  |
| C3-C2-N3-N2    | 177.41(9)   | C22-C21-C23-O2  | -7.80(18)   |
| C3-C2-N3-C25   | -12.85(16)  | C23-C21-C22-C7  | 179.08(10)  |
| C3-C4-C5-C6    | 72.12(13)   | C24-O1-C23-O2   | 1.56(18)    |
| C3-C4-C5-C20   | -107.53(12) | C24-O1-C23-C21  | -178.59(10) |
| C3-C4-C15-C14  | -0.91(16)   | C25-C26-C27-C28 | 177.92(11)  |
| C3-C12-C13-C14 | 0.42(17)    | C25-C26-C31-C30 | -178.10(11) |
| C4-C3-C12-C13  | -2.82(16)   | C26-C27-C28-C29 | 0.5(2)      |
| C4-C5-C6-C7    | -174.88(9)  | C27-C26-C31-C30 | 0.28(19)    |
| C4-C5-C20-C21  | 178.96(9)   | C27-C28-C29-C30 | -0.4(2)     |
| C5-C4-C15-C14  | 174.25(10)  | C28-C29-C30-C31 | 0.2(2)      |
| C5-C6-C7-C8    | 168.36(9)   | C29-C30-C31-C26 | -0.1(2)     |
| C5-C6-C7-C22   | -5.46(15)   | C31-C26-C27-C28 | -0.47(18)   |
| C5-C20-C21-C22 | -2.58(15)   |                 |             |
| C5-C20-C21-C23 | -179.65(10) |                 |             |
| C6-C5-C20-C21  | -0.69(15)   |                 |             |
| C6-C7-C8-C9    | -49.24(14)  |                 |             |
| C6-C7-C8-C16   | 134.35(11)  |                 |             |
| C6-C7-C22-C21  | 2.08(15)    |                 |             |
| C7-C8-C9-C10   | -0.41(15)   |                 |             |
| C7-C8-C9-C19   | -176.68(10) |                 |             |
| C7-C8-C16-C17  | 176.08(10)  |                 |             |
| C8-C7-C22-C21  | -171.65(10) |                 |             |
| C8-C9-C10-C11  | -8.1(5)     |                 |             |
| C8-C9-C19-C18  | 0.81(17)    |                 |             |
| C8-C16-C17-C18 | 0.23(18)    |                 |             |
| C9-C8-C16-C17  | -0.35(16)   |                 |             |
| C10-C9-C19-C18 | -175.30(11) |                 |             |



|              |             |  |  |
|--------------|-------------|--|--|
| C11–C1–N1–N2 | 174.51(10)  |  |  |
| C11–C1–C2–N3 | –174.35(11) |  |  |

Table S14. Hydrogen bonds for 3,5-Triazole-Reg2

| <b>D–H···A [Å]</b>          | <b>d(D–H) [Å]</b> | <b>d(H···A) [Å]</b> | <b>d(D···A) [Å]</b> | <b>&lt;(DHA) [°]</b> |
|-----------------------------|-------------------|---------------------|---------------------|----------------------|
| C25–H25B···O2 <sup>#1</sup> | 0.99              | 2.49                | 3.3696(15)          | 147.2                |

Symmetry transformations used to generate equivalent atoms:

#1: +X, -1+Y, +Z;
